# Supplementary material for: Injury and Illness in Non-Football Collegiate Athletics: a Single University, 8-Year Retrospective Analysis
Source: Research Square preprint supplement (doi:10.21203/rs.3.rs-7652417/v1), 2025-10-30
Supplement: Supplementary file 1 [file 238ea1b295abd63150da26f5.pdf]

**Table S1:** Injury rate comparisons between genders only. GEE model on injury rate per season.  
Reference level: Gender = Male

|             | Estimate | Std.err | Incidence Rate Ratio | 95% CI         | p-value |
|-------------|----------|---------|----------------------|----------------|---------|
| (Intercept) | 0.025    | 0.022   | 1.025                | (0.982, 1.070) | 0.254   |
| genderF     | 0.100    | 0.031   | 1.105                | (1.040, 1.175) | 0.001** |

**Table S2:** Main effects analysis using GEE models on injury rate per week with up to two-way interactions between gender, sport, body region, and training hours

|                                                                | P.Value    |
|----------------------------------------------------------------|------------|
| <b>Main effects with body region x total hours interaction</b> |            |
| Gender                                                         | 0.111      |
| Sport                                                          | 0.005      |
| Body Region                                                    | < 0.001*** |
| Total Hours                                                    | < 0.001*** |
| Academic Year                                                  | 0.314      |
| Body Region x Total Hours                                      | 0.729      |
| <b>All two-way interactions</b>                                |            |
| Gender                                                         | 0.456      |
| Sport                                                          | 0.031      |
| Body Region                                                    | < 0.001*** |
| Total Hours                                                    | < 0.001*** |
| Academic Year                                                  | 0.230      |
| Gender x Sport                                                 | 0.568      |
| Gender x Body Region                                           | 0.999      |
| Gender x Total Hours                                           | 0.294      |
| Sport x Body Region                                            | 0.428      |
| Sport x Total Hours                                            | 0.440      |
| Body Region x Total Hours                                      | 0.764      |
| <b>Remove gender x body region</b>                             |            |
| Gender                                                         | 0.456      |
| Sport                                                          | 0.032      |
| Body Region                                                    | < 0.001*** |
| Total Hours                                                    | < 0.001*** |
| Academic Year                                                  | 0.231      |
| Gender x Sport                                                 | 0.554      |
| Gender x Total Hours                                           | 0.292      |
| Sport x Body Region                                            | 0.424      |
| Sport x Total Hours                                            | 0.440      |
| Body Region x Total Hours                                      | 0.758      |
| <b>Remove total hours x body region</b>                        |            |
| Gender                                                         | 0.450      |
| Sport                                                          | 0.033      |
| Body Region                                                    | < 0.001*** |
| Total Hours                                                    | < 0.001*** |
| Academic Year                                                  | 0.238      |
| Gender x Sport                                                 | 0.558      |
| Gender x Total Hours                                           | 0.294      |
| Sport x Body Region                                            | 0.391      |
| Sport x Total Hours                                            | 0.439      |
| <b>Remove gender x sport</b>                                   |            |
| Gender                                                         | 0.452      |
| Sport                                                          | 0.032      |
| Body Region                                                    | < 0.001*** |
| Total Hours                                                    | < 0.001*** |
| Academic Year                                                  | 0.250      |
| Gender x Total Hours                                           | 0.128      |
| Sport x Body Region                                            | 0.407      |
| Sport x Total Hours                                            | 0.428      |
| <b>Remove total hours x sport</b>                              |            |
| Gender                                                         | 0.572      |
| Sport                                                          | 0.037      |
| Body Region                                                    | < 0.001*** |
| Total Hours                                                    | < 0.001*** |
| Academic Year                                                  | 0.220      |
| Gender x Total Hours                                           | 0.076      |
| Sport x Body Region                                            | 0.420      |
| <b>Remove sport x body region</b>                              |            |
| Gender                                                         | 0.575      |
| Sport                                                          | 0.077      |
| Body Region                                                    | < 0.001*** |
| Total Hours                                                    | < 0.001*** |
| Academic Year                                                  | 0.295      |
| Gender x Total Hours                                           | 0.077      |
| <b>Remove academic year</b>                                    |            |
| Gender                                                         | 0.589      |
| Sport                                                          | 0.075      |
| Body Region                                                    | < 0.001*** |
| Total Hours                                                    | < 0.001*** |
| Gender x Total Hours                                           | 0.077      |

**Table S3:** Comparisons of injury rate between genders by sport

|                 | Unadjusted P-value | P-value<br>(Bonferroni) | Difference<br>(%) | 95% CI<br>Adjusted by Bonferroni |
|-----------------|--------------------|-------------------------|-------------------|----------------------------------|
| Baseball        | 0.261              | >0.99                   | 12.09             | (-18.4, 42.57)                   |
| Basketball      | 0.668              | >0.99                   | 7.22              | (-40.5, 54.94)                   |
| Crew            | <0.001***          | 0.001**                 | 30.16             | (8.12, 52.19)                    |
| Cross Country   | 0.005**            | 0.055                   | 29.58             | (-0.34, 59.49)                   |
| Fencing         | 0.059              | 0.645                   | 24.09             | (-12.07, 60.24)                  |
| Soccer          | 0.428              | >0.99                   | 7.49              | (-19.31, 34.29)                  |
| Swimming/Diving | <0.001***          | 0.009**                 | 34.9              | (5.39, 64.41)                    |
| Tennis          | 0.608              | >0.99                   | -8.33             | (-54.41, 37.74)                  |
| Track and Field | 0.199              | >0.99                   | -10.3             | (-33.04, 12.43)                  |
| Volleyball      | 0.126              | >0.99                   | -19.94            | (-56.95, 17.07)                  |
| Water Polo      | 0.381              | >0.99                   | 9.84              | (-22.02, 41.71)                  |

**Percentage of Athletes with Given Number of Injuries Per Academic Year**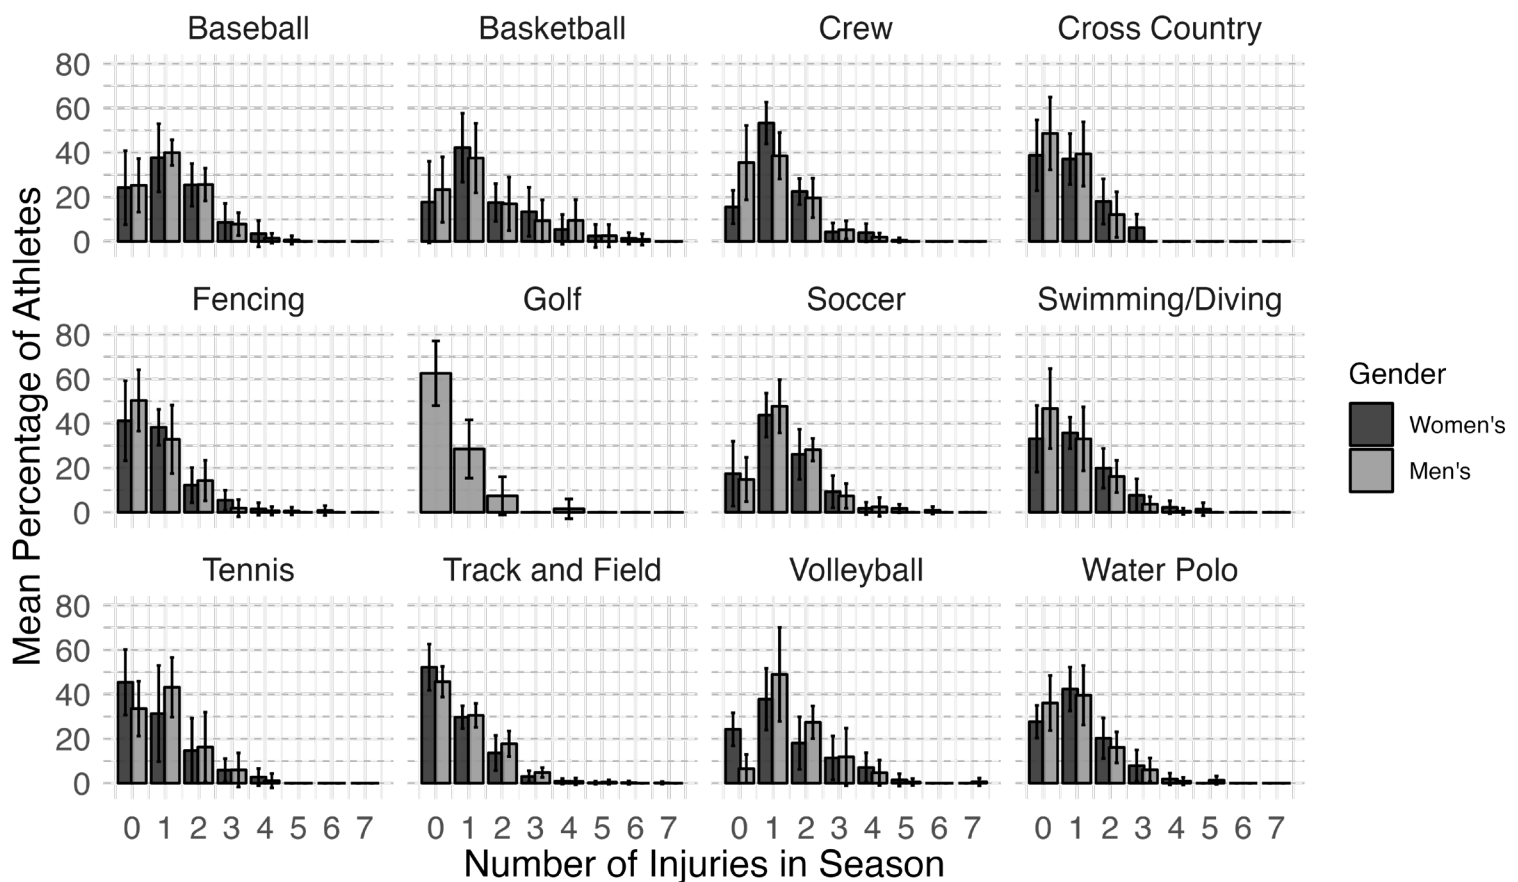**Figure S1:** Average percentage of athletes who incurred a specific number of injuries per season across the eight seasons for each of the participating sports.**Table S4:** Comparisons of injury rate between genders by body region

|                 | Unadjusted P-value | P-value<br>(Bonferroni) | P-value<br>(Bonferroni-Holm) | Difference<br>(%) | 95% CI<br>Adjusted by Bonferroni |
|-----------------|--------------------|-------------------------|------------------------------|-------------------|----------------------------------|
| Head            | 0.317              | 1.000                   | 0.469                        | 0.92              | (-1.51, 3.34)                    |
| Lower Extremity | <0.001***          | <0.001***               | <0.001***                    | 8.76              | (3.3, 14.21)                     |
| Miscellaneous   | 0.052              | 0.314                   | 0.262                        | 0.61              | (-0.21, 1.43)                    |
| Spine           | 0.111              | 0.664                   | 0.442                        | 1.08              | (-0.72, 2.88)                    |
| Trunk           | 0.234              | 1.000                   | 0.469                        | 1.9               | (-2.33, 6.13)                    |
| Upper Extremity | 0.141              | 0.848                   | 0.442                        | -2.21             | (-6.14, 1.73)                    |

**Table S5:** GEE model on injury rate per week per season adjusting for academic year.  
Reference levels: Gender = Male, Sport = Baseball/Softball, academicYear = 2012-2013.

|                       | Estimate | Std.err | Incidence Rate Ratio | 95% CI         | p-value   | $\chi^2$ value         | Pr(> $\chi^2$ ) |
|-----------------------|----------|---------|----------------------|----------------|-----------|------------------------|-----------------|
| (Intercept)           | -2.533   | 0.094   | 0.079                | (0.066, 0.095) | <0.001*** |                        |                 |
| week                  | -0.044   | 0.001   | 0.957                | (0.955, 0.959) | <0.001*** |                        |                 |
| genderF               | 0.101    | 0.055   | 1.106                | (0.994, 1.232) | 0.065     |                        |                 |
| sportBasketball       | 0.223    | 0.137   | 1.250                | (0.955, 1.636) | 0.103     | $\chi^2_{11} = 83.358$ | <0.001***       |
| sportCrew             | -0.084   | 0.102   | 0.920                | (0.752, 1.124) | 0.412     |                        |                 |
| sportCross Country    | -0.478   | 0.134   | 0.620                | (0.477, 0.806) | <0.001*** |                        |                 |
| sportFencing          | -0.425   | 0.143   | 0.654                | (0.494, 0.865) | 0.003**   |                        |                 |
| sportGolf             | -0.883   | 0.281   | 0.413                | (0.238, 0.718) | 0.002**   |                        |                 |
| sportSoccer           | 0.111    | 0.112   | 1.118                | (0.898, 1.391) | 0.319     |                        |                 |
| sportSwimming/Diving  | -0.275   | 0.119   | 0.760                | (0.601, 0.961) | 0.021*    |                        |                 |
| sportTennis           | -0.271   | 0.162   | 0.763                | (0.555, 1.049) | 0.095     |                        |                 |
| sportTrack and Field  | -0.448   | 0.110   | 0.639                | (0.514, 0.793) | <0.001*** |                        |                 |
| sportVolleyball       | 0.231    | 0.123   | 1.259                | (0.989, 1.603) | 0.060     |                        |                 |
| sportWater Polo       | -0.164   | 0.124   | 0.849                | (0.665, 1.083) | 0.185     |                        |                 |
| academicYear2013-2014 | -0.421   | 0.064   | 0.656                | (0.579, 0.744) | <0.001*** | $\chi^2_7 = 63.490$    | <0.001***       |
| academicYear2014-2015 | -0.232   | 0.073   | 0.793                | (0.687, 0.916) | 0.001**   |                        |                 |
| academicYear2015-2016 | -0.428   | 0.077   | 0.652                | (0.560, 0.758) | <0.001*** |                        |                 |
| academicYear2016-2017 | -0.381   | 0.079   | 0.683                | (0.585, 0.797) | <0.001*** |                        |                 |
| academicYear2017-2018 | -0.268   | 0.076   | 0.765                | (0.658, 0.888) | <0.001*** |                        |                 |
| academicYear2018-2019 | -0.275   | 0.079   | 0.760                | (0.651, 0.887) | <0.001*** |                        |                 |
| academicYear2019-2020 | -0.395   | 0.079   | 0.674                | (0.576, 0.787) | <0.001*** |                        |                 |

Each week of training was associated with having a 4.3% lower injury rate compared to the previous week, adjusting for gender, sport, and academic year, and this difference was significant (IRR = 0.957,  $P < 0.001$ ).

**Table S6:** GEE model on injury rate per week per season where variable of interest is total training hours.  
Reference levels: Gender = Male, Sport = Baseball/Softball, academicYear = 2012-2013.

|                       | Estimate | Std.err | Incidence Rate Ratio | 95% CI         | p-value   | $\chi^2$ value         | Pr(> $\chi^2$ ) |
|-----------------------|----------|---------|----------------------|----------------|-----------|------------------------|-----------------|
| (Intercept)           | -4.754   | 0.109   | 0.009                | (0.007, 0.011) | <0.001*** |                        |                 |
| total.hours           | 0.080    | 0.002   | 1.083                | (1.079, 1.087) | <0.001*** |                        |                 |
| genderF               | 0.034    | 0.059   | 1.035                | (0.922, 1.161) | 0.562     |                        |                 |
| sportBasketball       | 0.583    | 0.138   | 1.791                | (1.367, 2.347) | <0.001*** | $\chi^2_{10} = 68.508$ | <0.001***       |
| sportCrew             | 0.222    | 0.102   | 1.248                | (1.021, 1.525) | 0.030*    |                        |                 |
| sportCross Country    | 0.331    | 0.137   | 1.392                | (1.063, 1.822) | 0.016*    |                        |                 |
| sportFencing          | 0.054    | 0.144   | 1.055                | (0.795, 1.400) | 0.710     |                        |                 |
| sportGolf             | -0.357   | 0.283   | 0.700                | (0.401, 1.220) | 0.207     |                        |                 |
| sportSoccer           | 0.690    | 0.114   | 1.993                | (1.592, 2.495) | <0.001*** |                        |                 |
| sportSwimming/Diving  | 0.563    | 0.124   | 1.756                | (1.375, 2.243) | <0.001*** |                        |                 |
| sportTennis           | 0.220    | 0.163   | 1.247                | (0.904, 1.719) | 0.178     |                        |                 |
| sportVolleyball       | 0.556    | 0.124   | 1.744                | (1.368, 2.224) | <0.001*** |                        |                 |
| sportWater Polo       | 0.292    | 0.125   | 1.339                | (1.047, 1.714) | 0.020*    |                        |                 |
| academicYear2013-2014 | -0.413   | 0.069   | 0.661                | (0.577, 0.758) | <0.001*** | $\chi^2_7 = 56.863$    | <0.001***       |
| academicYear2014-2015 | -0.250   | 0.079   | 0.779                | (0.666, 0.910) | 0.002**   |                        |                 |
| academicYear2015-2016 | -0.450   | 0.083   | 0.638                | (0.542, 0.751) | <0.001*** |                        |                 |
| academicYear2016-2017 | -0.404   | 0.084   | 0.667                | (0.565, 0.788) | <0.001*** |                        |                 |
| academicYear2017-2018 | -0.248   | 0.081   | 0.780                | (0.665, 0.915) | 0.002**   |                        |                 |
| academicYear2018-2019 | -0.254   | 0.084   | 0.775                | (0.658, 0.914) | 0.002**   |                        |                 |
| academicYear2019-2020 | -0.403   | 0.085   | 0.668                | (0.566, 0.790) | <0.001*** |                        |                 |

Each additional hour of training (either workout, practice, or game) was associated with a 8.3% increase in injury rate (IRR = 1.083,  $P < 0.001$ ) after adjusting for gender, sport, and year.
