# Supplementary material for: Injury and Illness in Non-Football Collegiate Athletics: a Single University, 8-Year Retrospective Analysis
Source: Research Square preprint supplement (doi:10.21203/rs.3.rs-7652417/v1), 2025-10-30
Supplement: Supplementary file 1 [file Injury_Data_Full.xlsx]

## Sheet: Injury_Dataset - Injury_Data_Fu
ID	Injury Date	Gender	Sport	Body Area	Asssessment	Injury Diagnosis	Diagnosis Summary	Occurrence	Side (code)	Type of injury	Injury Classification	Academic Year
1	2018-09-23	M	Baseball	Elbow	ATR: Forearm manual treatments Weight Room: as tolerated Baseball: as tolerated				L	Pain	Upper Extremity	2018-2019
19	2012-02-20	M	Baseball	Elbow	I saw the pt. this week and he stated his shoulder was feeling much better. I want to keep and eye in this injury as it may have implications on his recovering elbow.				R	Sprains / Strains	Upper Extremity	2011-2012
31	2012-04-26	M	Baseball	Lower Back	Pt. has been working with me on core strengthening as a preventative measure due to his history of back injury. He has made much improvement in the ATR. We will continue to work with him on his core strength and stability. He is full participation.				N	Strain	Trunk	2011-2012
50	2012-08-06	M	Baseball	Chest					L	Strain	Trunk	2012-2013
58	2012-08-13	M	Baseball	Hip	Pt. followed up with Dr. Robertson this week. He is feeling 75% better in terms of shoulder pain. She believes that he should throw a bit this week to test it out. She ordered and MRI and told him it was his decision whether he wanted to have the imaging. He is talk with his parents about this decision. He will still work with me 3x weekly for his shoulder. Pt. is to participate as tolerated in t…				B	"Cartilage Injury (Articular. labrum. meniscus. rib)"	Lower Extremity	2012-2013
113	2012-08-30	M	Baseball	Elbow	ATR: Core Strengthening/ Low back Treatments. Weight Room:As tolerated Baseball: no hitting				L	"Strain (Muscle. tendon)"	Upper Extremity	2012-2013
182	2012-09-27	M	Baseball	Thigh	ATR: Hand treatments Weight room: As tolerated Baseball: as tolerated				L	Strain	Trunk	2012-2013
195	2012-10-01	M	Baseball	Shoulder	Pt. has been very consistent with his rehab and is doing well. I have him seeing acupuncture and chiropractic to work on some scapular trigger points to see if that will help with his shoulder function.				L	"Cartilage Injury (Articular. labrum. meniscus. rib)"	Upper Extremity	2012-2013
58	2012-10-01	M	Baseball	Finger	Pt. followed up with Dr. Robertson this week. He is feeling 75% better in terms of shoulder pain. She believes that he should throw a bit this week to test it out. She ordered and MRI and told him it was his decision whether he wanted to have the imaging. He is talk with his parents about this decision. He will still work with me 3x weekly for his shoulder. Pt. is to participate as tolerated in t…				R	Fracture	Upper Extremity	2012-2013
213	2012-10-03	M	Baseball	Head	Pt. c/o of pain over his left carpal bone. I think it is just a bruise. I have him coming in 3x weekly to work on it. Pt. is still able to participate full go with the help of a wrist tape.				N	Concussion	Head	2012-2013
213	2012-10-10	M	Baseball	Calf	Pt. c/o of pain over his left carpal bone. I think it is just a bruise. I have him coming in 3x weekly to work on it. Pt. is still able to participate full go with the help of a wrist tape.				R	Sprain/Strain	Lower Extremity	2012-2013
258	2012-10-11	M	Baseball	Head	ATR: Back Treatments Weight Room: No Heavy Lifting. Avoid Back extension exercises. Baseball: As tolerated				N	Concussion	Head	2012-2013
261	2012-10-11	M	Baseball	Wrist	ATR: acute treatments Weight Room: as tolerated Baseball: as tolerated				R	Sprain	Upper Extremity	2012-2013
268	2012-10-12	M	Baseball	Elbow	ATR: Back/Hamstring Manual treatments Weight Room: As tolerated Baseball: As tolerated				R	Nerve	Upper Extremity	2012-2013
269	2012-10-13	M	Baseball	Knee	Pt. came in last week with some swelling in his knee. He states that this is not a new issue and that this happens frequently when he dives. I believe that he has some fat pad syndrome that is causing this. I am more than happy to work with him on this but he has not returned to the ATR. I will contact him and see if this injury is still bothering him.				R	bursitis	Lower Extremity	2012-2013
276	2012-10-15	M	Baseball	Ankle	"ATR: saw him for thoracic spasms. will continue as needed Weight room: be careful of back concentrated lifts Baseball: no limitations"				R	Inflammation	Lower Extremity	2012-2013
19	2012-10-15	M	Baseball	Ankle	I saw the pt. this week and he stated his shoulder was feeling much better. I want to keep and eye in this injury as it may have implications on his recovering elbow.				R	Sprain	Lower Extremity	2012-2013
258	2012-10-19	M	Baseball	Knee	ATR: Back Treatments Weight Room: No Heavy Lifting. Avoid Back extension exercises. Baseball: As tolerated				L	"Cartilage Injury (Articular. labrum. meniscus. rib)"	Lower Extremity	2012-2013
312	2012-10-22	M	Baseball	Head	"ATR: working on posture to relieve shoulder pain Weight room: avoid too much pec strengthening. focus on posterior strength Baseball: as tolerated. be cautious of change in pain to sharp pain"				L	Concussion	Head	2012-2013
31	2012-10-22	M	Baseball	Patella	Pt. has been working with me on core strengthening as a preventative measure due to his history of back injury. He has made much improvement in the ATR. We will continue to work with him on his core strength and stability. He is full participation.				R	Patella Femoral Pain Syndrome	Lower Extremity	2012-2013
317	2012-10-23	M	Baseball	Lower Back	ATR: maintaining back health with core rehab Weight room: be cautious of heavy loads Baseball: as tolerated				N	Pain	Trunk	2012-2013
320	2012-10-23	M	Baseball	Head					N	Concussion	Head	2012-2013
31	2012-10-25	M	Baseball	Head	Pt. has been working with me on core strengthening as a preventative measure due to his history of back injury. He has made much improvement in the ATR. We will continue to work with him on his core strength and stability. He is full participation.				B		Head	2012-2013
353	2012-11-01	M	Baseball	Eye					L	Contusion (Hematoma)	Head	2012-2013
366	2012-11-04	M	Baseball	Lower Back	ATR: Has f/u appointment with Dr. Robertson Today Weight room: Can do upper body strengthening. Baseball: Can throw.				B	Pain	Trunk	2012-2013
213	2012-11-09	M	Baseball	Shins	Pt. c/o of pain over his left carpal bone. I think it is just a bruise. I have him coming in 3x weekly to work on it. Pt. is still able to participate full go with the help of a wrist tape.			Acute	L	Abrasion	Lower Extremity	2012-2013
392	2012-11-09	M	Baseball	Hand	"ATR: Manual treatments. Neural Flossing. Stretching Weight Room: as tolerated Baseball: Limited to three innings if painful. If he feels like he can pitch he can continue."				L	Bruise	Upper Extremity	2012-2013
213	2012-11-16	M	Baseball	Wrist	Pt. c/o of pain over his left carpal bone. I think it is just a bruise. I have him coming in 3x weekly to work on it. Pt. is still able to participate full go with the help of a wrist tape.				L	Contusion	Upper Extremity	2012-2013
425	2012-11-19	M	Baseball	Hand	ATR: Acute management Weight Room: as tolerated Baseball: as tolerated				L	Contusion	Upper Extremity	2012-2013
276	2012-11-26	M	Baseball	Foot	"ATR: saw him for thoracic spasms. will continue as needed Weight room: be careful of back concentrated lifts Baseball: no limitations"				L	Plantar Fascitis	Lower Extremity	2012-2013
182	2012-12-07	M	Baseball	Neck	ATR: Hand treatments Weight room: As tolerated Baseball: as tolerated				R	Sprain	Head	2012-2013
486	2013-01-10	M	Baseball	Ankle	ATR: Shoulder Program. Weight room: No overhead activity Baseball: No throwing during the week.				L	Sprain	Lower Extremity	2012-2013
195	2013-01-11	M	Baseball	Knee	Pt. has been very consistent with his rehab and is doing well. I have him seeing acupuncture and chiropractic to work on some scapular trigger points to see if that will help with his shoulder function.				R	Pain	Lower Extremity	2012-2013
491	2013-01-12	M	Baseball	Shoulder	4 months p/o RC repair. Limited as per surgeons orders.				R	"Cartilage Injury (Articular. labrum. meniscus. rib)"	Upper Extremity	2012-2013
495	2013-01-14	M	Baseball	Shoulder	ATR: Wrist Treatments Weight room: As tolerated Baseball: as tolerated			Sub-Acute	R	Pain	Upper Extremity	2012-2013
510	2013-01-16	M	Baseball	Thigh	"ATR: came into ATR on Tuesday. but has not been back since Weight room: cautious of hamstring involved exercises Baseball: be cautious of speed work"			Acute	R	Strain	Trunk	2012-2013
276	2013-01-17	M	Baseball	Back	"ATR: saw him for thoracic spasms. will continue as needed Weight room: be careful of back concentrated lifts Baseball: no limitations"			Acute	U	Pain	Trunk	2012-2013
516	2013-01-17	M	Baseball	Wrist	ATR: treatment to promote healing Weight room: be cautious of loading into wrist extension Baseball: as tolerated and needs to tape before participation				L	Contusion (Hematoma)	Upper Extremity	2012-2013
312	2013-01-18	M	Baseball	Shoulder	"ATR: working on posture to relieve shoulder pain Weight room: avoid too much pec strengthening. focus on posterior strength Baseball: as tolerated. be cautious of change in pain to sharp pain"			Sub-Acute	R	Impingement	Upper Extremity	2012-2013
495	2013-01-19	M	Baseball	Rib	ATR: Wrist Treatments Weight room: As tolerated Baseball: as tolerated			Acute	R	Pain	Trunk	2012-2013
182	2013-01-24	M	Baseball	Shoulder	ATR: Hand treatments Weight room: As tolerated Baseball: as tolerated				R	Pain	Upper Extremity	2012-2013
353	2013-01-30	M	Baseball	Face					R	Contusion	Head	2012-2013
510	2013-01-30	M	Baseball	Shoulder	"ATR: came into ATR on Tuesday. but has not been back since Weight room: cautious of hamstring involved exercises Baseball: be cautious of speed work"			Acute	R	Pain	Upper Extremity	2012-2013
366	2013-02-04	M	Baseball	Shoulder	ATR: Has f/u appointment with Dr. Robertson Today Weight room: Can do upper body strengthening. Baseball: Can throw.				L	Impingement	Upper Extremity	2012-2013
556	2013-02-04	M	Baseball	Foot					L	Pain	Lower Extremity	2012-2013
353	2013-02-04	M	Baseball	Shins					L	stress reaction	Lower Extremity	2012-2013
560	2013-02-05	M	Baseball	Lower Leg					L	Pain	Lower Extremity	2012-2013
320	2013-02-07	M	Baseball	Face				Acute	L	Laceration	Head	2012-2013
268	2013-02-12	M	Baseball	Rib	ATR: Back/Hamstring Manual treatments Weight Room: As tolerated Baseball: As tolerated			Acute	R	Subluxation	Trunk	2012-2013
591	2013-02-19	M	Baseball	SI joint	"ATR: We will continue to stretch and relieve muscle spasm Weight room: Limit strenuous back concentrated lifts. Baseball: Should begin throwing again this week. allow for steady build up"				L	Pain	Spine	2012-2013
392	2013-02-20	M	Baseball	Bicep	"ATR: Manual treatments. Neural Flossing. Stretching Weight Room: as tolerated Baseball: Limited to three innings if painful. If he feels like he can pitch he can continue."			Chronic	R	Unspecified Injury	Upper Extremity	2012-2013
276	2013-03-07	M	Baseball	Shoulder	"ATR: saw him for thoracic spasms. will continue as needed Weight room: be careful of back concentrated lifts Baseball: no limitations"			Acute	L	Impingement	Upper Extremity	2012-2013
591	2013-03-26	M	Baseball	Face	"ATR: We will continue to stretch and relieve muscle spasm Weight room: Limit strenuous back concentrated lifts. Baseball: Should begin throwing again this week. allow for steady build up"			Acute	R	Contusion	Head	2012-2013
486	2013-04-02	M	Baseball	Back	ATR: Shoulder Program. Weight room: No overhead activity Baseball: No throwing during the week.				B		Trunk	2012-2013
650	2013-04-04	M	Baseball	Knee				Acute	L	Bursitis/Tendonitis	Lower Extremity	2012-2013
666	2013-04-15	M	Baseball	Elbow	ATR: knee treatments Weight Room: As tolerated Baseball: As tolerated			Chronic	R	Pain	Upper Extremity	2012-2013
670	2013-04-16	M	Baseball	Foot	"ATR: Manual elbow treatments. with shoulder program. Weight Room: As tolerated Baseball: No Restrictions"			Chronic	R	Contusion	Lower Extremity	2012-2013
672	2013-04-16	M	Baseball	Lower Leg	ATR:Posterior Cuff manual treatments and Neuromuscular control exercises. Weight Room: No restrictions Baseball: Throw first Bullpen.				R	Strain	Lower Extremity	2012-2013
670	2013-04-22	M	Baseball	Arm	"ATR: Manual elbow treatments. with shoulder program. Weight Room: As tolerated Baseball: No Restrictions"				R	bursitis	Upper Extremity	2012-2013
58	2013-04-23	M	Baseball	Mouth	Pt. followed up with Dr. Robertson this week. He is feeling 75% better in terms of shoulder pain. She believes that he should throw a bit this week to test it out. She ordered and MRI and told him it was his decision whether he wanted to have the imaging. He is talk with his parents about this decision. He will still work with me 3x weekly for his shoulder. Pt. is to participate as tolerated in t…			Acute	N	Laceration	Head	2012-2013
650	2013-04-26	M	Baseball	Finger					R	Inflammation	Upper Extremity	2012-2013
687	2013-05-01	M	Baseball	Rib					R	Subluxation	Trunk	2012-2013
486	2013-05-04	M	Baseball	Bicep	ATR: Shoulder Program. Weight room: No overhead activity Baseball: No throwing during the week.			Chronic	R	Tendinosis	Upper Extremity	2012-2013
268	2013-05-23	M	Baseball	Knee	ATR: Back/Hamstring Manual treatments Weight Room: As tolerated Baseball: As tolerated			Acute	R	Tendinitis	Lower Extremity	2012-2013
747	2013-09-16	M	Baseball	Unspecified	ATR: work on soft tissue Weight Room: As tolerated Baseball: As tolerated				N	Unspecified Injury	Miscellaneous	2013-2014
268	2013-09-17	M	Baseball	Hand	ATR: Back/Hamstring Manual treatments Weight Room: As tolerated Baseball: As tolerated				L		Upper Extremity	2013-2014
672	2013-09-21	M	Baseball	Shoulder	ATR:Posterior Cuff manual treatments and Neuromuscular control exercises. Weight Room: No restrictions Baseball: Throw first Bullpen.				R	Strain	Upper Extremity	2013-2014
752	2013-09-23	M	Baseball	Knee	ATR: Lower Body Strengthening. Weight Room: as tolerated Baseball:as tolerated				L	Osteochondropathy	Lower Extremity	2013-2014
754	2013-09-23	M	Baseball	Elbow	"ATR: Shoulder/elbow prehab 2x a week. Elbow manual therapy. Will have surgery on Thursday. Weight Room: As tolerated- modified push ups but no pull ups Baseball: SLOW progression to throwing."			Chronic	R		Upper Extremity	2013-2014
758	2013-09-27	M	Baseball	Hamstring	ATR: Soft Tissue work/Stretching Program/Glute activation Weight Room: as tolerated Baseball: No sprinting				L	Strain	Lower Extremity	2013-2014
777	2013-10-07	M	Baseball	Ankle				Acute	L	Sprain	Lower Extremity	2013-2014
258	2013-10-16	M	Baseball	Hand	ATR: Back Treatments Weight Room: No Heavy Lifting. Avoid Back extension exercises. Baseball: As tolerated				L	Bone	Upper Extremity	2013-2014
819	2013-10-25	M	Baseball	Neck	ATR: Manual Treatments Weight Room: As tolerated Sport: As tolerated				L	Spasm	Head	2013-2014
828	2013-10-31	M	Baseball	Shoulder	ATR: Shoulder program Weight Room: No overhead activities Baseball: Can long toss to 120-150ft couple of times a week.				R	Impingement	Upper Extremity	2013-2014
834	2013-11-04	M	Baseball	Hand	ATR: Cryotherapy Weight Room: No excessive load on knee Baseball: Light Running.				L	Bruise	Upper Extremity	2013-2014
666	2013-11-04	M	Baseball	Head	ATR: knee treatments Weight Room: As tolerated Baseball: As tolerated				N	Concussion	Head	2013-2014
353	2013-11-11	M	Baseball	Shoulder					L	Contusion	Upper Extremity	2013-2014
856	2013-11-13	M	Baseball	Hamstring	ATR: Soft Tissue work/ Stretching program Weight Room: As tolerated Baseball: As tolerated				R	Strain	Lower Extremity	2013-2014
495	2013-12-06	M	Baseball	Head	ATR: Wrist Treatments Weight room: As tolerated Baseball: as tolerated				R	Pain	Head	2013-2014
891	2014-01-08	M	Baseball	Hand	ATR: Shoulder manual treatments. Weight room: No pull ups or overhead activities. Baseball:Throwing. Limit to 90 feet.				L		Upper Extremity	2013-2014
113	2014-01-08	M	Baseball	Back	ATR: Core Strengthening/ Low back Treatments. Weight Room:As tolerated Baseball: no hitting				R	Spasm	Trunk	2013-2014
666	2014-01-11	M	Baseball	Hamstring	ATR: knee treatments Weight Room: As tolerated Baseball: As tolerated				R	Strain	Lower Extremity	2013-2014
366	2014-01-14	M	Baseball	Knee	ATR: Has f/u appointment with Dr. Robertson Today Weight room: Can do upper body strengthening. Baseball: Can throw.				L	Pain	Lower Extremity	2013-2014
834	2014-01-15	M	Baseball	Knee	ATR: Cryotherapy Weight Room: No excessive load on knee Baseball: Light Running.				R	Contusion	Lower Extremity	2013-2014
926	2014-01-23	M	Baseball	Hamstring	ATR: Concussion RTP protocol Weight Room: Can start lifting by Wednesday Baseball: Can start hitting of the cage on Tuesday. Full contact practice by Thursday.				L	Tendonitis	Lower Extremity	2013-2014
258	2014-02-05	M	Baseball	Back	ATR: Back Treatments Weight Room: No Heavy Lifting. Avoid Back extension exercises. Baseball: As tolerated				B	Pain	Trunk	2013-2014
950	2014-02-10	M	Baseball	Knee	ATR: treating Inflammation Weight Room: Cautious with deep squatting Baseball: No Running.				L	bursitis	Lower Extremity	2013-2014
969	2014-02-24	M	Baseball	Back	ATR: Soft Tissue and Stretching program Weight Room: As tolerated Baseball: as tolerated				R	Muscular Imbalance	Trunk	2013-2014
495	2014-02-26	M	Baseball	Wrist	ATR: Wrist Treatments Weight room: As tolerated Baseball: as tolerated				L	Bruise	Upper Extremity	2013-2014
971	2014-02-26	M	Baseball	Elbow	ATR: Rest Weight Room: Modified upper/ can do lower body Baseball: No throw				R		Upper Extremity	2013-2014
666	2014-02-26	M	Baseball	Knee	ATR: knee treatments Weight Room: As tolerated Baseball: As tolerated				L	Bursitis/Tendonitis	Lower Extremity	2013-2014
819	2014-03-07	M	Baseball	Tricep	ATR: Manual Treatments Weight Room: As tolerated Sport: As tolerated				L	Spasm	Upper Extremity	2013-2014
926	2014-03-07	M	Baseball	Chest	ATR: Concussion RTP protocol Weight Room: Can start lifting by Wednesday Baseball: Can start hitting of the cage on Tuesday. Full contact practice by Thursday.				L	Bruise	Trunk	2013-2014
926	2014-03-07	M	Baseball	Head	ATR: Concussion RTP protocol Weight Room: Can start lifting by Wednesday Baseball: Can start hitting of the cage on Tuesday. Full contact practice by Thursday.				N	Concussion	Head	2013-2014
392	2014-03-17	M	Baseball	Shins	"ATR: Manual treatments. Neural Flossing. Stretching Weight Room: as tolerated Baseball: Limited to three innings if painful. If he feels like he can pitch he can continue."				L	Inflammation	Lower Extremity	2013-2014
268	2014-03-18	M	Baseball	Back	ATR: Back/Hamstring Manual treatments Weight Room: As tolerated Baseball: As tolerated				L	Spasm	Trunk	2013-2014
856	2014-03-18	M	Baseball	Back	ATR: Soft Tissue work/ Stretching program Weight Room: As tolerated Baseball: As tolerated				B	Pain	Trunk	2013-2014
486	2014-03-21	M	Baseball	Shoulder	ATR: Shoulder Program. Weight room: No overhead activity Baseball: No throwing during the week.				L	Pain	Upper Extremity	2013-2014
392	2014-03-26	M	Baseball	Abdomen	"ATR: Manual treatments. Neural Flossing. Stretching Weight Room: as tolerated Baseball: Limited to three innings if painful. If he feels like he can pitch he can continue."				L	Spasm	Trunk	2013-2014
261	2014-03-31	M	Baseball	Calcaneus	ATR: acute treatments Weight Room: as tolerated Baseball: as tolerated				L	Bruise	Lower Extremity	2013-2014
747	2014-04-05	M	Baseball	Shoulder	ATR: work on soft tissue Weight Room: As tolerated Baseball: As tolerated				R	Pain	Upper Extremity	2013-2014
856	2014-04-14	M	Baseball	Knee	ATR: Soft Tissue work/ Stretching program Weight Room: As tolerated Baseball: As tolerated				L		Lower Extremity	2013-2014
969	2014-05-23	M	Baseball	Thigh	ATR: Soft Tissue and Stretching program Weight Room: As tolerated Baseball: as tolerated			Sub-Acute	L	Strain	Trunk	2013-2014
182	2014-09-13	M	Baseball	Knee	ATR: Hand treatments Weight room: As tolerated Baseball: as tolerated				L	Pain	Lower Extremity	2014-2015
1076	2014-09-16	M	Baseball	Shoulder					R		Upper Extremity	2014-2015
1089	2014-09-29	M	Baseball	Ankle					R	Sprain	Lower Extremity	2014-2015
1090	2014-09-30	M	Baseball	Hamstring	Field: Can throw live BP Spanos: No agility work				L		Lower Extremity	2014-2015
856	2014-09-30	M	Baseball	Elbow	ATR: Soft Tissue work/ Stretching program Weight Room: As tolerated Baseball: As tolerated				R		Upper Extremity	2014-2015
495	2014-10-01	M	Baseball	Hamstring	ATR: Wrist Treatments Weight room: As tolerated Baseball: as tolerated				L	Strain	Lower Extremity	2014-2015
1	2014-10-07	M	Baseball	Hamstring	ATR: Forearm manual treatments Weight Room: as tolerated Baseball: as tolerated				L		Lower Extremity	2014-2015
1101	2014-10-07	M	Baseball	Lumbar spine					L	"Disc Injury (herniation. degeneration)"	Spine	2014-2015
926	2014-10-10	M	Baseball	Groin	ATR: Concussion RTP protocol Weight Room: Can start lifting by Wednesday Baseball: Can start hitting of the cage on Tuesday. Full contact practice by Thursday.			Chronic	R	Pain	Trunk	2014-2015
261	2014-10-10	M	Baseball	Back	ATR: acute treatments Weight Room: as tolerated Baseball: as tolerated				N		Trunk	2014-2015
950	2014-10-22	M	Baseball	Hamstring	ATR: treating Inflammation Weight Room: Cautious with deep squatting Baseball: No Running.				R		Lower Extremity	2014-2015
1165	2014-10-23	M	Baseball	Elbow	Field: No Limitations Spanos: No Limitations				R	Tendonitis	Upper Extremity	2014-2015
1169	2014-10-24	M	Baseball	Elbow					R	Sprain/Strain	Upper Extremity	2014-2015
1185	2014-10-30	M	Baseball	Shoulder	Field: No Limitations Spanos: No Limitations			Chronic	R	Impingement	Upper Extremity	2014-2015
1197	2014-11-10	M	Baseball	Ankle					L	Sprain	Lower Extremity	2014-2015
1090	2014-11-11	M	Baseball	Shoulder	Field: Can throw live BP Spanos: No agility work			Acute	R	Impingement Syndrome	Upper Extremity	2014-2015
1201	2014-11-12	M	Baseball	Back					R	Spasm	Trunk	2014-2015
1204	2014-11-14	M	Baseball	Shoulder					L	Pain	Upper Extremity	2014-2015
1205	2014-11-17	M	Baseball	Shoulder					R		Upper Extremity	2014-2015
1220	2014-12-01	M	Baseball	Back					N		Trunk	2014-2015
392	2014-12-11	M	Baseball	Thoracic spine	"ATR: Manual treatments. Neural Flossing. Stretching Weight Room: as tolerated Baseball: Limited to three innings if painful. If he feels like he can pitch he can continue."				N		Spine	2014-2015
1	2015-01-08	M	Baseball	Back	ATR: Forearm manual treatments Weight Room: as tolerated Baseball: as tolerated				L		Trunk	2014-2015
1165	2015-01-10	M	Baseball	Knee	Field: No Limitations Spanos: No Limitations				B	Tendinitis	Lower Extremity	2014-2015
366	2015-01-14	M	Baseball	Arm	ATR: Has f/u appointment with Dr. Robertson Today Weight room: Can do upper body strengthening. Baseball: Can throw.				N	Bruise	Upper Extremity	2014-2015
1254	2015-01-16	M	Baseball	Groin				Acute	L	Strain	Trunk	2014-2015
1257	2015-01-16	M	Baseball	Forearm				Acute	R	Impingement	Upper Extremity	2014-2015
1201	2015-01-20	M	Baseball	Lower Leg					B		Lower Extremity	2014-2015
754	2015-01-26	M	Baseball	Back	"ATR: Shoulder/elbow prehab 2x a week. Elbow manual therapy. Will have surgery on Thursday. Weight Room: As tolerated- modified push ups but no pull ups Baseball: SLOW progression to throwing."				N		Trunk	2014-2015
754	2015-02-20	M	Baseball	SI joint	"ATR: Shoulder/elbow prehab 2x a week. Elbow manual therapy. Will have surgery on Thursday. Weight Room: As tolerated- modified push ups but no pull ups Baseball: SLOW progression to throwing."			Chronic	N		Spine	2014-2015
366	2015-03-03	M	Baseball	Hamstring	ATR: Has f/u appointment with Dr. Robertson Today Weight room: Can do upper body strengthening. Baseball: Can throw.				R		Lower Extremity	2014-2015
1201	2015-03-03	M	Baseball	Back				Acute	B	Strain	Trunk	2014-2015
1220	2015-03-09	M	Baseball	Lower Limb				Acute	R	"Strain (Muscle. tendon)"	Lower Extremity	2014-2015
495	2015-03-10	M	Baseball	Toes	ATR: Wrist Treatments Weight room: As tolerated Baseball: as tolerated			Acute	R	Contusion	Lower Extremity	2014-2015
1254	2015-03-13	M	Baseball	Thumb				Acute	R	Strain	Upper Extremity	2014-2015
819	2015-03-13	M	Baseball	Hamstring	ATR: Manual Treatments Weight Room: As tolerated Sport: As tolerated				L	Strain	Lower Extremity	2014-2015
747	2015-03-13	M	Baseball	Lumbar spine	ATR: work on soft tissue Weight Room: As tolerated Baseball: As tolerated				B		Spine	2014-2015
392	2015-03-17	M	Baseball	Knee	"ATR: Manual treatments. Neural Flossing. Stretching Weight Room: as tolerated Baseball: Limited to three innings if painful. If he feels like he can pitch he can continue."			Acute	R	ITB Syndrome	Lower Extremity	2014-2015
1090	2015-03-18	M	Baseball	Lower Back	Field: Can throw live BP Spanos: No agility work				L	Strain	Trunk	2014-2015
1169	2015-03-18	M	Baseball	Back				Acute	L	Spasm	Trunk	2014-2015
366	2015-03-31	M	Baseball	Elbow	ATR: Has f/u appointment with Dr. Robertson Today Weight room: Can do upper body strengthening. Baseball: Can throw.				R	Sprain/Strain	Upper Extremity	2014-2015
1089	2015-04-01	M	Baseball	Finger					L	Sprain	Upper Extremity	2014-2015
1333	2015-04-02	M	Baseball	Elbow				Acute	L	Sprain/Strain	Upper Extremity	2014-2015
1205	2015-04-14	M	Baseball	Lower Back					R	Sprain/Strain	Trunk	2014-2015
926	2015-04-24	M	Baseball	Thumb	ATR: Concussion RTP protocol Weight Room: Can start lifting by Wednesday Baseball: Can start hitting of the cage on Tuesday. Full contact practice by Thursday.				R		Upper Extremity	2014-2015
1185	2015-05-28	M	Baseball	Unspecified	Field: No Limitations Spanos: No Limitations				N	Unspecified Injury	Miscellaneous	2014-2015
1220	2015-08-05	M	Baseball	Elbow					R		Upper Extremity	2015-2016
1205	2015-08-21	M	Baseball	Elbow					L	Strain	Upper Extremity	2015-2016
1402	2015-09-20	M	Baseball	Kidney					N	Unclassified	Trunk	2015-2016
320	2015-09-20	M	Baseball	Shoulder					R	Impingement	Upper Extremity	2015-2016
1201	2015-09-22	M	Baseball	Elbow					R	Tendon	Upper Extremity	2015-2016
1410	2015-09-22	M	Baseball	Ankle					L	Instability	Lower Extremity	2015-2016
1415	2015-09-24	M	Baseball	Hamstring	Field: No running Spanos: No running				L	Strain	Lower Extremity	2015-2016
1430	2015-09-30	M	Baseball	Thigh					B	Strain	Trunk	2015-2016
1169	2015-10-01	M	Baseball	Nose					N	Dislocation	Head	2015-2016
1436	2015-10-02	M	Baseball	Foot	Field: Batting as tolerated Spanos: No Limitations				L	Contusion	Lower Extremity	2015-2016
1442	2015-10-06	M	Baseball	Groin					L	"Strain (Muscle. tendon)"	Trunk	2015-2016
1448	2015-10-08	M	Baseball	Biceps				Chronic	R	Tendinitis	Upper Extremity	2015-2016
856	2015-10-08	M	Baseball	Chest	ATR: Soft Tissue work/ Stretching program Weight Room: As tolerated Baseball: As tolerated			Acute	R	Tendinitis	Trunk	2015-2016
495	2015-10-08	M	Baseball	Neck	ATR: Wrist Treatments Weight room: As tolerated Baseball: as tolerated				N		Head	2015-2016
1454	2015-10-09	M	Baseball	Hamstring				Acute	L	Strain	Lower Extremity	2015-2016
1468	2015-10-12	M	Baseball	Shoulder				Chronic	L	Strain	Upper Extremity	2015-2016
1090	2015-10-20	M	Baseball	Back	Field: Can throw live BP Spanos: No agility work			Acute	R	Strain	Trunk	2015-2016
1516	2015-10-28	M	Baseball	Wrist	Field: No Limitations Spanos: No Limitations			Acute	R	"Cartilage Injury (Articular. labrum. meniscus. rib)"	Upper Extremity	2015-2016
1430	2015-10-29	M	Baseball	Thigh				Acute	L	Spasm	Trunk	2015-2016
758	2015-11-03	M	Baseball	Knee	ATR: Soft Tissue work/Stretching Program/Glute activation Weight Room: as tolerated Baseball: No sprinting			Acute	R	Unclassified	Lower Extremity	2015-2016
819	2015-11-13	M	Baseball	Shoulder	ATR: Manual Treatments Weight Room: As tolerated Sport: As tolerated			Acute	R	Sprain	Upper Extremity	2015-2016
1415	2015-11-30	M	Baseball	Wrist	Field: No running Spanos: No running				L		Upper Extremity	2015-2016
1436	2016-01-28	M	Baseball	Back	Field: Batting as tolerated Spanos: No Limitations			Acute	R	Muscle	Trunk	2015-2016
1205	2016-02-08	M	Baseball	Hamstring				Acute	R	Strain	Lower Extremity	2015-2016
1442	2016-03-02	M	Baseball	Back				Chronic	R	Muscle	Trunk	2015-2016
1672	2016-03-07	M	Baseball	Shoulder				Acute	R	"Cartilage Injury (Articular. labrum. meniscus. rib)"	Upper Extremity	2015-2016
495	2016-03-07	M	Baseball	Shins	ATR: Wrist Treatments Weight room: As tolerated Baseball: as tolerated				B	Muscle	Lower Extremity	2015-2016
1694	2016-04-14	M	Baseball	Shoulder					L	"Cartilage Injury (Articular. labrum. meniscus. rib)"	Upper Extremity	2015-2016
261	2016-04-15	M	Baseball	Head	ATR: acute treatments Weight Room: as tolerated Baseball: as tolerated			Acute	N	Concussion	Head	2015-2016
1516	2016-04-29	M	Baseball	Lower Limb	Field: No Limitations Spanos: No Limitations			Acute	R	Sprain	Lower Extremity	2015-2016
1757	2016-09-20	M	Baseball	Shoulder					L		Upper Extremity	2016-2017
1767	2016-09-27	M	Baseball	Shoulder					R	Pain	Upper Extremity	2016-2017
1772	2016-09-28	M	Baseball	Shoulder	Field: No Limitations Spanos: Extra rotator cuff exercises				R		Upper Extremity	2016-2017
1774	2016-09-29	M	Baseball	Rotator Cuff					R	Tendinitis	Upper Extremity	2016-2017
1442	2016-10-05	M	Baseball	Back					U		Trunk	2016-2017
1516	2016-10-06	M	Baseball	Back	Field: No Limitations Spanos: No Limitations				N		Trunk	2016-2017
1430	2016-10-08	M	Baseball	Elbow					L	Unspecified Injury	Upper Extremity	2016-2017
1813	2016-10-14	M	Baseball	Head	Field: No Limitations Spanos: No Limitations				N		Head	2016-2017
1415	2016-10-16	M	Baseball	Lower Back	Field: No running Spanos: No running				N	Pain	Trunk	2016-2017
1818	2016-10-19	M	Baseball	Wrist					B		Upper Extremity	2016-2017
1822	2016-10-22	M	Baseball	Tricep					R	Tendonitis	Upper Extremity	2016-2017
1436	2016-10-25	M	Baseball	Shins	Field: Batting as tolerated Spanos: No Limitations				B	Pain	Lower Extremity	2016-2017
1856	2016-11-05	M	Baseball	Rib					R	Contusion / strain / sprain / fracture	Trunk	2016-2017
1860	2016-11-08	M	Baseball	Back					R	Spasm	Trunk	2016-2017
1856	2016-12-08	M	Baseball	Wrist					L		Upper Extremity	2016-2017
1922	2017-01-14	M	Baseball	Shins					R	Contusion	Lower Extremity	2016-2017
1757	2017-01-15	M	Baseball	Shoulder					R	Strain	Upper Extremity	2016-2017
1923	2017-01-15	M	Baseball	Hamstring	Field: As Tolerated Spanos: As Tolerated				L	Strain	Lower Extremity	2016-2017
320	2017-01-18	M	Baseball	Abdomen					R	Strain	Trunk	2016-2017
1672	2017-01-18	M	Baseball	Tricep					L	Spasm	Upper Extremity	2016-2017
1672	2017-01-24	M	Baseball	Back					L		Trunk	2016-2017
1454	2017-01-25	M	Baseball	Back					R	Strain	Trunk	2016-2017
1415	2017-02-03	M	Baseball	Head	Field: No running Spanos: No running				N	Laceration	Head	2016-2017
1923	2017-02-07	M	Baseball	Shoulder	Field: As Tolerated Spanos: As Tolerated				L	Sprain/Strain	Upper Extremity	2016-2017
1818	2017-02-08	M	Baseball	Head					L		Head	2016-2017
1822	2017-02-16	M	Baseball	Face					N	Fracture	Head	2016-2017
1333	2017-02-24	M	Baseball	Hand					R	Fracture	Upper Extremity	2016-2017
1922	2017-03-01	M	Baseball	Elbow					R	Sprain	Upper Extremity	2016-2017
1694	2017-03-08	M	Baseball	Back					L	Strain	Trunk	2016-2017
1989	2017-03-08	M	Baseball	Forearm					L	Fracture	Upper Extremity	2016-2017
1813	2017-03-09	M	Baseball	Rotator Cuff	Field: No Limitations Spanos: No Limitations				R	Strain	Upper Extremity	2016-2017
2009	2017-03-30	M	Baseball	Shoulder	Field: As tolerated Spanos: As tolerated				R	Impingement	Upper Extremity	2016-2017
2024	2017-04-16	M	Baseball	Unspecified	Field: As tolerated Spanos: No Limitations				N	General Medicine	Miscellaneous	2016-2017
2036	2017-04-26	M	Baseball	Knee	Field: No Limitations Spanos: No Limitations				R	"Disorders of synovium. tendon and bursa"	Lower Extremity	2016-2017
2040	2017-05-02	M	Baseball	Head					N	Unspecified Injury	Head	2016-2017
1468	2017-05-28	M	Baseball	Shoulder					R	Unspecified Injury	Upper Extremity	2016-2017
1923	2017-07-20	M	Baseball	Shoulder	Field: As Tolerated Spanos: As Tolerated				R		Upper Extremity	2016-2017
2088	2017-08-30	M	Baseball	Shoulder	Field: As tolerated for pain Spanos: No Limitations				R	Impingement	Upper Extremity	2017-2018
2101	2017-09-19	M	Baseball	Knee	Field: No Limitations Spanos: No Limitations				L	Foreign Body	Lower Extremity	2017-2018
1185	2017-09-27	M	Baseball	Hamstring	Field: No Limitations Spanos: No Limitations				L	"Strain (Muscle. tendon)"	Lower Extremity	2017-2018
2112	2017-10-02	M	Baseball	Elbow	Field: Throwing Program 4x/week Spanos: No Limitations				L	Sprain/Strain	Upper Extremity	2017-2018
1165	2017-10-04	M	Baseball	Neck/Cervical Spine	Field: No Limitations Spanos: No Limitations				B	Spasm	Spine	2017-2018
2024	2017-10-04	M	Baseball	Shoulder	Field: As tolerated Spanos: No Limitations				R	Impingement	Upper Extremity	2017-2018
2122	2017-10-05	M	Baseball	Shoulder	Field: No Limitations Spanos: Extra rotator cuff and scap work				L	Subluxation / Dislocation	Upper Extremity	2017-2018
2036	2017-10-10	M	Baseball	Elbow	Field: No Limitations Spanos: No Limitations				L	Tendinitis	Upper Extremity	2017-2018
2088	2017-10-10	M	Baseball	Face	Field: As tolerated for pain Spanos: No Limitations				B	Laceration	Head	2017-2018
2137	2017-10-11	M	Baseball	Rotator Cuff	Field: As tolerated Spanos: Extra rotator cuff exercises				R	Strain	Upper Extremity	2017-2018
2145	2017-10-12	M	Baseball	Shoulder	Field: As tolerated Spanos: As tolerated				R	Strain	Upper Extremity	2017-2018
2148	2017-10-13	M	Baseball	Rotator Cuff	Field: As tolerated Spanos: Extra rotator cuff exercises				R	Strain	Upper Extremity	2017-2018
2152	2017-10-14	M	Baseball	Shoulder	Field: No Participation Spanos: Can do some lower body/core work outs				R	Sprain	Upper Extremity	2017-2018
2160	2017-10-17	M	Baseball	Lower Back	Field: As tolerated Spanos: Needs extra core exercises				B	Pain	Trunk	2017-2018
2168	2017-10-20	M	Baseball	Abdomen	Field: As tolerated Spanos: No Limitations				R	Strain	Trunk	2017-2018
1415	2017-10-21	M	Baseball	Thigh	Field: No running Spanos: No running				R	Spasm	Trunk	2017-2018
1436	2017-10-24	M	Baseball	Wrist	Field: Batting as tolerated Spanos: No Limitations				L	Sprain	Upper Extremity	2017-2018
2122	2017-10-28	M	Baseball	Hip	Field: No Limitations Spanos: Extra rotator cuff and scap work				R	Spasm	Lower Extremity	2017-2018
2197	2017-10-31	M	Baseball	Elbow	Field: As tolerated Spanos: No Restrictions				R	Tendinitis	Upper Extremity	2017-2018
2088	2017-11-02	M	Baseball	Lower Back	Field: As tolerated for pain Spanos: No Limitations				R	Strain	Trunk	2017-2018
2207	2017-11-02	M	Baseball	Hamstring	Field: As tolerated Spanos: As tolerated				R	Strain	Lower Extremity	2017-2018
2208	2017-11-02	M	Baseball	Hip	Field: As tolerated Spanos: Needs extra core exercises				R	Strain	Lower Extremity	2017-2018
2209	2017-11-03	M	Baseball	Ankle	Field: As tolerated Spanos: As tolerated				R	Sprain	Lower Extremity	2017-2018
1813	2017-11-06	M	Baseball	Shins	Field: No Limitations Spanos: No Limitations				R	Pain	Lower Extremity	2017-2018
2145	2017-11-08	M	Baseball	Back	Field: As tolerated Spanos: As tolerated				R	Strain	Trunk	2017-2018
2009	2017-11-08	M	Baseball	Ankle	Field: As tolerated Spanos: As tolerated				R	Sprain	Lower Extremity	2017-2018
1090	2017-12-01	M	Baseball	Shoulder	Field: Can throw live BP Spanos: No agility work				L	Dislocation	Upper Extremity	2017-2018
2137	2017-12-07	M	Baseball	Lower Back	Field: As tolerated Spanos: Extra rotator cuff exercises				R	Strain	Trunk	2017-2018
1767	2018-01-18	M	Baseball	Head					N	Concussion	Head	2017-2018
2313	2018-01-29	M	Baseball	Hip					B	Muscular Imbalance	Lower Extremity	2017-2018
2122	2018-01-31	M	Baseball	Ankle / foot	Field: No Limitations Spanos: Extra rotator cuff and scap work				L		Lower Extremity	2017-2018
2112	2018-02-06	M	Baseball	Toe	Field: Throwing Program 4x/week Spanos: No Limitations				L	Strain	Lower Extremity	2017-2018
2324	2018-02-06	M	Baseball	Forearm					L	Nerve	Upper Extremity	2017-2018
2036	2018-02-12	M	Baseball	Hamstring	Field: No Limitations Spanos: No Limitations				L	Strain	Lower Extremity	2017-2018
2334	2018-02-13	M	Baseball	Elbow					R	Strain	Upper Extremity	2017-2018
2313	2018-02-15	M	Baseball	Neck					N	Contusion	Head	2017-2018
2101	2018-02-16	M	Baseball	Foot	Field: No Limitations Spanos: No Limitations				R	Open Wound	Lower Extremity	2017-2018
1415	2018-02-19	M	Baseball	Hamstring	Field: No running Spanos: No running				R	Strain	Lower Extremity	2017-2018
2341	2018-02-19	M	Baseball	Shoulder					R	Tendinitis	Upper Extremity	2017-2018
2145	2018-02-20	M	Baseball	Shins	Field: As tolerated Spanos: As tolerated				B	Pain	Lower Extremity	2017-2018
2208	2018-02-28	M	Baseball	Elbow	Field: As tolerated Spanos: Needs extra core exercises				R	Nerve	Upper Extremity	2017-2018
2324	2018-03-14	M	Baseball	Back					R	Spasm	Trunk	2017-2018
2365	2018-03-21	M	Baseball	Elbow					R	Strain	Upper Extremity	2017-2018
2324	2018-04-02	M	Baseball	Head					N	Concussion	Head	2017-2018
2145	2018-04-16	M	Baseball	Hamstring	Field: As tolerated Spanos: As tolerated				R	Strain	Lower Extremity	2017-2018
2160	2018-04-17	M	Baseball	Patella	Field: As tolerated Spanos: Needs extra core exercises				L	Pain	Lower Extremity	2017-2018
2386	2018-04-18	M	Baseball	Head					N	Concussion	Head	2017-2018
2197	2018-04-23	M	Baseball	Back	Field: As tolerated Spanos: No Restrictions				R	Pain	Trunk	2017-2018
2209	2018-05-07	M	Baseball	Thigh	Field: As tolerated Spanos: As tolerated				L	Pain	Trunk	2017-2018
2148	2018-05-16	M	Baseball	Elbow	Field: As tolerated Spanos: Extra rotator cuff exercises				R	Pain	Upper Extremity	2017-2018
2334	2018-07-12	M	Baseball	Hamstring					R	Strain	Lower Extremity	2017-2018
2168	2018-08-17	M	Baseball	Elbow	Field: As tolerated Spanos: No Limitations				L	Tendinitis	Upper Extremity	2018-2019
2334	2018-08-22	M	Baseball	Hamstring					L	Spasm/Cramp	Lower Extremity	2018-2019
2466	2018-09-24	M	Baseball	Wrist					R	Fracture	Upper Extremity	2018-2019
2467	2018-09-25	M	Baseball	Thigh					R	Muscle	Trunk	2018-2019
2486	2018-10-02	M	Baseball	Shoulder					L	Impingement	Upper Extremity	2018-2019
1923	2018-10-05	M	Baseball	Thoracic spine	Field: As Tolerated Spanos: As Tolerated				L	Spasm	Spine	2018-2019
2498	2018-10-09	M	Baseball	Hamstring					R	Strain	Lower Extremity	2018-2019
2503	2018-10-10	M	Baseball	Shoulder					R	Pain	Upper Extremity	2018-2019
2506	2018-10-10	M	Baseball	Head				Acute	N	Concussion	Head	2018-2019
2508	2018-10-10	M	Baseball	MCL					R	Sprain	Lower Extremity	2018-2019
2512	2018-10-11	M	Baseball	Shoulder					N	Impingement	Upper Extremity	2018-2019
2514	2018-10-11	M	Baseball	Shoulder					R	Impingement	Upper Extremity	2018-2019
2514	2018-10-15	M	Baseball	Ankle				Sub-Acute	B	Pain	Lower Extremity	2018-2019
2508	2018-10-30	M	Baseball	Calcaneus				Sub-Acute	L	Contusion	Lower Extremity	2018-2019
2313	2018-11-01	M	Baseball	Toe					R	Fracture	Lower Extremity	2018-2019
2569	2018-11-05	M	Baseball	Shoulder					R	Pain	Upper Extremity	2018-2019
2571	2018-11-05	M	Baseball	Wrist					R	Fracture	Upper Extremity	2018-2019
2591	2018-11-12	M	Baseball	Knee					R	Tendonitis	Lower Extremity	2018-2019
2024	2018-11-20	M	Baseball	Back	Field: As tolerated Spanos: No Limitations				L	Pain	Trunk	2018-2019
2486	2018-11-28	M	Baseball	Hip					L	Sprain/Strain	Lower Extremity	2018-2019
2591	2019-01-10	M	Baseball	Lower Back					R	Pain	Trunk	2018-2019
2641	2019-01-12	M	Baseball	Hamstring				Acute	R	"Strain (Muscle. tendon)"	Lower Extremity	2018-2019
2503	2019-01-14	M	Baseball	Hamstring					L	Strain	Lower Extremity	2018-2019
2514	2019-01-17	M	Baseball	Back				Acute	W	"Strain (Muscle. tendon)"	Trunk	2018-2019
1923	2019-01-25	M	Baseball	Groin	Field: As Tolerated Spanos: As Tolerated				R	Strain	Trunk	2018-2019
2486	2019-01-25	M	Baseball	Shins					R	stress reaction	Lower Extremity	2018-2019
2207	2019-01-31	M	Baseball	Brain	Field: As tolerated Spanos: As tolerated				N	Concussion	Head	2018-2019
2641	2019-02-02	M	Baseball	Abdomen					N	Pain	Trunk	2018-2019
2692	2019-02-19	M	Baseball	Wrist					R	Sprain/Strain	Upper Extremity	2018-2019
2694	2019-02-19	M	Baseball	Elbow					R	Strain	Upper Extremity	2018-2019
2313	2019-03-03	M	Baseball	Elbow					L		Upper Extremity	2018-2019
2692	2019-03-11	M	Baseball	Hamstring				Acute	N	Strain	Lower Extremity	2018-2019
2209	2019-03-19	M	Baseball	Ankle	Field: As tolerated Spanos: As tolerated				L	Sprain	Lower Extremity	2018-2019
2148	2019-03-29	M	Baseball	Foot	Field: As tolerated Spanos: Extra rotator cuff exercises				L	Strain	Lower Extremity	2018-2019
2467	2019-04-02	M	Baseball	Wrist					R	Contusion	Upper Extremity	2018-2019
2514	2019-04-03	M	Baseball	Hip					L	Pain	Lower Extremity	2018-2019
2467	2019-04-15	M	Baseball	Knee					R	bursitis	Lower Extremity	2018-2019
2498	2019-04-24	M	Baseball	Lower Back					L	Pain	Trunk	2018-2019
2591	2019-04-29	M	Baseball	Shoulder					L	Impingement	Upper Extremity	2018-2019
2148	2019-05-01	M	Baseball	Groin	Field: As tolerated Spanos: Extra rotator cuff exercises				R	Hernia	Trunk	2018-2019
2508	2019-05-13	M	Baseball	Back				Chronic	B	Spasm	Trunk	2018-2019
2207	2019-05-23	M	Baseball	Abdomen	Field: As tolerated Spanos: As tolerated				N		Trunk	2018-2019
2148	2019-05-28	M	Baseball	Ankle / foot	Field: As tolerated Spanos: Extra rotator cuff exercises			Acute	R	Sprain	Lower Extremity	2018-2019
2781	2019-08-21	M	Baseball	Shoulder					L	Pain	Upper Extremity	2019-2020
2793	2019-08-26	M	Baseball	Shoulder					L	Pain	Upper Extremity	2019-2020
2795	2019-08-28	M	Baseball	Ankle				Acute	R	Sprain	Lower Extremity	2019-2020
2137	2019-10-03	M	Baseball	Hamstring	Field: As tolerated Spanos: Extra rotator cuff exercises				R	Strain	Lower Extremity	2019-2020
2694	2019-10-05	M	Baseball	Shins					B	Pain	Lower Extremity	2019-2020
2854	2019-10-08	M	Baseball	Neck					L	Spasm	Head	2019-2020
2857	2019-10-08	M	Baseball	Lower Back					L	Pain	Trunk	2019-2020
2865	2019-10-09	M	Baseball	Groin					L	Pain	Trunk	2019-2020
2795	2019-10-10	M	Baseball	Achilles tendon					L	Pain	Lower Extremity	2019-2020
2878	2019-10-14	M	Baseball	Knee					R	Pain	Lower Extremity	2019-2020
2889	2019-10-17	M	Baseball	Hip					L	Strain	Lower Extremity	2019-2020
2591	2019-10-21	M	Baseball	Thoracic spine					R	Pain	Spine	2019-2020
2905	2019-10-22	M	Baseball	Ankle					L	Sprain	Lower Extremity	2019-2020
2916	2019-10-25	M	Baseball	Shoulder					R	Pain	Upper Extremity	2019-2020
2905	2019-10-29	M	Baseball	Shoulder					L	Sprain	Upper Extremity	2019-2020
2467	2019-11-05	M	Baseball	Elbow					L	Hyperextension	Upper Extremity	2019-2020
2955	2019-11-13	M	Baseball	Lower Back					B	Pain	Trunk	2019-2020
2781	2019-11-20	M	Baseball	Back					B	Pain	Trunk	2019-2020
2506	2019-11-26	M	Baseball	Shoulder					R	Subluxation	Upper Extremity	2019-2020
2995	2020-01-06	M	Baseball	Shoulder					N		Upper Extremity	2019-2020
2854	2020-01-08	M	Baseball	Thigh					L	Pain	Trunk	2019-2020
2857	2020-01-10	M	Baseball	Shoulder					R	Pain	Upper Extremity	2019-2020
2506	2020-01-13	M	Baseball	Hamstring					R	Strain	Lower Extremity	2019-2020
2498	2020-01-14	M	Baseball	Shoulder					R	Contusion	Upper Extremity	2019-2020
2313	2020-01-15	M	Baseball	Hip					L	Pain	Lower Extremity	2019-2020
2512	2020-01-20	M	Baseball	Elbow					L	Pain	Upper Extremity	2019-2020
2878	2020-01-22	M	Baseball	Shoulder					R	Muscular Imbalance	Upper Extremity	2019-2020
2905	2020-01-22	M	Baseball	Ankle / foot					R	Pain	Lower Extremity	2019-2020
2854	2020-01-24	M	Baseball	Mouth					N		Head	2019-2020
2995	2020-01-30	M	Baseball	Ankle					R	Sprain	Lower Extremity	2019-2020
2591	2020-02-05	M	Baseball	Back					L	Strain	Trunk	2019-2020
3041	2020-02-05	M	Baseball	Shoulder					L	Contusion	Upper Extremity	2019-2020
3047	2020-02-11	M	Baseball	Shoulder					R	Pain	Upper Extremity	2019-2020
2197	2020-02-11	M	Baseball	Hamstring	Field: As tolerated Spanos: No Restrictions				L	Spasm	Lower Extremity	2019-2020
2514	2020-02-12	M	Baseball	Shoulder					L	Pain	Upper Extremity	2019-2020
1516	2020-02-17	M	Baseball	Lower Back	Field: No Limitations Spanos: No Limitations				L	Pain	Trunk	2019-2020
3077	2020-03-03	M	Baseball	Groin					L	Pain	Trunk	2019-2020
3081	2020-03-03	M	Baseball	Knee					L	Pain	Lower Extremity	2019-2020
2512	2020-04-29	M	Baseball	Knee					L	Tendon	Lower Extremity	2019-2020
2508	2020-07-07	M	Baseball	Neck					L	Pain	Head	2019-2020
3093	2022-05-03	M	Baseball	Left Lower Leg Foot	Posterior Tibialis Tendinopathy						Lower Extremity	2021-2022
3096	2022-03-11	M	Baseball	Right Lower Arm Hand	R UCL Injury						Upper Extremity	2021-2022
3277	2022-02-28	M	Baseball	Right Upper Arm							Upper Extremity	2021-2022
3104	2022-03-22	M	Baseball	Left Lower Arm Hand	UCL injury						Upper Extremity	2021-2022
3093	2022-03-24	M	Baseball	Right Upper Arm	Wrist Flexor/Pronator Strain vs. UCL Injury						Upper Extremity	2021-2022
3114	2022-01-21	M	Baseball		Moderate UCL Spain						Upper Extremity	2021-2022
2508	2022-01-28	M	Baseball		Moderate UCL Sprain						Upper Extremity	2021-2022
2955	2022-01-24	M	Baseball	Right Lower Arm Hand	Suspected hamate Fx.						Upper Extremity	2021-2022
3203	2022-01-20	M	Baseball		Overuse and tightness in scapular stabilizer muscles						Upper Extremity	2021-2022
3081	2022-01-24	M	Baseball	Left Posterior Upper Leg	Grade I/II Bicep Femoris Strain						Lower Extremity	2021-2022
3217	2021-04-10	M	Baseball	Right Upper Arm	UCL Tear vs. Flexor/Pronator Strain						Upper Extremity	2020-2021
3183	2021-10-18	M	Baseball								Lower Extremity	2021-2022
3189	2021-10-06	M	Baseball	Right Lower Leg Foot	Medial Malleolus Bruise		Medial Malleolus Bruise				Lower Extremity	2021-2022
2508	2021-09-23	M	Baseball	Right Upper Arm							Upper Extremity	2021-2022
2878	2021-09-20	M	Baseball	Right Pelvis							Trunk	2021-2022
2878	2021-09-20	M	Baseball	Right Upper Leg							Lower Extremity	2021-2022
3203	2021-08-25	M	Baseball	Right Upper Arm	Ulnar nerve impingement.						Upper Extremity	2021-2022
3229	2021-07-30	M	Baseball	Left Upper Arm	Fatigue from Throwing						Upper Extremity	2020-2021
3203	2021-07-01	M	Baseball	Hand		Middle phalanx fracture index finger	Right Anterior Hand WFFE Middle phalanx fracture index finger				Upper Extremity	2020-2021
3217	2021-05-25	M	Baseball	Right Lower Arm Hand	"S-A needs to improve L hamstring. Flex:Ext. Add:Abd. IR:ER strength ratios."						Upper Extremity	2020-2021
3229	2021-04-15	M	Baseball								Lower Extremity	2020-2021
3047	2021-04-12	M	Baseball	Right Upper Arm							Upper Extremity	2020-2021
2467	2021-04-02	M	Baseball	Left Upper Leg	L Hip Rotator Inactivation causing overcompensation by the adductors.						Lower Extremity	2020-2021
3183	2021-03-31	M	Baseball								Lower Extremity	2020-2021
3239	2021-03-18	M	Baseball	Left Posterior Upper Leg	Hamstring Strain						Lower Extremity	2020-2021
3183	2021-03-11	M	Baseball								Trunk	2020-2021
3298	2021-03-09	M	Baseball		L Semitendinosis Strain						Lower Extremity	2020-2021
2995	2021-03-02	M	Baseball	Right Lower Arm Hand, Elbow	Grade I UCL Sprain	Elbow medial ligament injury	Right Anterior Elbow EJMX Elbow medial ligament injury				Upper Extremity	2020-2021
2508	2020-12-31	M	Baseball								Lower Extremity	2020-2021
3081	2020-11-19	M	Baseball	Right Thoracic Shoulder, Shoulder	"Subscapular Diskenesis. AC Joint Irritation"	Acute anterior internal impingement	Right Anterior Shoulder SGIA Acute anterior internal impingement				Upper Extremity	2020-2021
2878	2020-11-13	M	Baseball	Right Lower Leg Foot							Lower Extremity	2020-2021
2955	2020-10-12	M	Baseball	Right Thoracic Shoulder	Anterior Impingement due to weakness in the IRs and lack of Total Arc.		Anterior Impingement				Upper Extremity	2020-2021
3368	2021-03-16	M	Baseball	Other							Miscellaneous	2020-2021
3370	2021-03-09	M	Baseball	Other							Miscellaneous	2020-2021
3114	2022-08-04	M	Baseball	Upper Extremity	Anteiror Impingement of Subscapularis Tendon vs. Labral Injury						Upper Extremity	2022-2023
3422	2022-05-13	M	Baseball	Elbow EUMX Elbow valgus instability	UCL Injury vs. Stress Reaction	UCL Injury vs. Stress Reaction					Upper Extremity	2021-2022
3093	2022-05-03	M	Baseball		Posterior Tibialis Tendinopathy						Lower Extremity	2021-2022
2955	2022-01-24	M	Baseball		Suspected hamate Fx.						Miscellaneous	2021-2022
2508	2021-09-23	M	Baseball								Upper Extremity	2021-2022
2878	2021-09-20	M	Baseball								Trunk	2021-2022
3217	2021-04-10	M	Baseball		UCL Tear vs. Flexor/Pronator Strain						Upper Extremity	2020-2021
3047	2021-04-12	M	Baseball								Miscellaneous	2020-2021
2467	2021-04-02	M	Baseball								Miscellaneous	2020-2021
3183	2021-03-31	M	Baseball								Lower Extremity	2020-2021
3239	2021-03-21	M	Baseball								Miscellaneous	2020-2021
3183	2021-03-19	M	Baseball								Miscellaneous	2020-2021
3229	2020-12-06	M	Baseball	Medical Illness MIZX Other infection not otherwise specified			COVID				Miscellaneous	2020-2021
2508	2021-01-05	M	Baseball								Miscellaneous	2020-2021
3217	2020-10-21	M	Baseball								Miscellaneous	2020-2021
2955	2020-10-15	M	Baseball								Miscellaneous	2020-2021
3270	2020-10-13	M	Baseball								Miscellaneous	2020-2021
3271	2020-10-08	M	Baseball								Miscellaneous	2020-2021
3183	2021-10-18	M	Baseball								Lower Extremity	2021-2022
3217	2021-05-25	M	Baseball	Right Lower Arm Hand	"S-A needs to improve L hamstring. Flex:Ext. Add:Abd. IR:ER strength ratios."						Lower Extremity	2020-2021
3229	2021-04-15	M	Baseball								Lower Extremity	2020-2021
3183	2021-03-11	M	Baseball								Lower Extremity	2020-2021
2508	2020-12-31	M	Baseball								Lower Extremity	2020-2021
3368	2021-03-16	M	Baseball		B Hip Dysplasia						Lower Extremity	2020-2021
3370	2021-03-09	M	Baseball		L Semitendinosis Strain						Lower Extremity	2020-2021
3	2011-08-17	F	Basketball	Back					N	"Disc Injury (herniation. degeneration)"	Trunk	2011-2012
11	2011-10-11	F	Basketball	Back	ATR: using modalities for pain control Weight Room: as tolerated Sport: as tolerated				N	"Disc Injury (herniation. degeneration)"	Trunk	2011-2012
25	2012-03-20	F	Basketball	Knee	ATR: Working on tissue integrity Weight Room: Full Sport: Must be taped before any activity				L	Joint	Lower Extremity	2011-2012
28	2012-04-11	F	Basketball	Thumb	ATR: Rehabiliation for lateral ankle strength. Weight Room: Full Participation Sport: Full Participation				L	Dislocation	Upper Extremity	2011-2012
33	2012-05-26	F	Basketball	Foot	ATR: Pt. underwent a plica removal on the 29th. We have begun her post op care. Weight Room: No weight bearing knee flexion. Sport: No participation				L	"Fracture (Acute. avulsion. stress)"	Lower Extremity	2011-2012
34	2012-06-27	F	Basketball	Knee					L	Meniscal injury/tear	Lower Extremity	2011-2012
49	2012-08-04	F	Basketball	Ankle				Acute	L	Sprain	Lower Extremity	2012-2013
63	2012-08-13	M	Basketball	Ankle				Acute	R	Sprain	Lower Extremity	2012-2013
66	2012-08-14	M	Basketball	Ankle					L	Unclassified	Lower Extremity	2012-2013
66	2012-08-14	M	Basketball	Neck					L	Nerve	Head	2012-2013
85	2012-08-18	M	Basketball	Ankle	"Torn ligaments. prehab program for knee"				R	Sprain	Lower Extremity	2012-2013
86	2012-08-18	M	Basketball	Back					B	Sprain	Trunk	2012-2013
98	2012-08-23	F	Basketball	Thigh					B	Strain	Trunk	2012-2013
123	2012-09-05	M	Basketball	Back					N	Strain	Trunk	2012-2013
135	2012-09-08	M	Basketball	Back	Maintenance treatments as needed				N	stress reaction	Trunk	2012-2013
140	2012-09-11	M	Basketball	Achilles tendon				Chronic	R	Tendinitis	Lower Extremity	2012-2013
141	2012-09-13	F	Basketball	Knee	ATR: working on inflammation Weight Room: full participation Sport: full participation				L	ITB Syndrome	Lower Extremity	2012-2013
145	2012-09-14	F	Basketball	Lumbar spine				Acute	R	Sprain	Spine	2012-2013
135	2012-09-18	M	Basketball	Ankle / foot	Maintenance treatments as needed				L	"Strain (Muscle. tendon)"	Lower Extremity	2012-2013
3	2012-09-20	F	Basketball	Shoulder					L	Sprain/Strain	Upper Extremity	2012-2013
167	2012-09-20	F	Basketball	Ankle	"ATR: Waiting on wrist imaging. will update. has been having wrist taped. Weight Room: As tolerated Sport: As tolerated"			Sub-Acute	B	Enthesopathy	Lower Extremity	2012-2013
177	2012-09-25	M	Basketball	Knee	All activity as tolerated. Continue maintenance in ATR.				R	Tendinitis	Lower Extremity	2012-2013
179	2012-09-25	M	Basketball	Knee	Following a progressive return to play plan.				R	"Strain (Muscle. tendon)"	Lower Extremity	2012-2013
187	2012-09-28	F	Basketball	Ankle / foot	"ATR: working on pain management and function restoration Weight Room: limited to mobility until further notice Sport: limited. will progress as tolerated. Will touch base with coaching staff daily"				L	Tenosynovitis	Lower Extremity	2012-2013
135	2012-10-01	M	Basketball	Foot	Maintenance treatments as needed			Sub-Acute	R	"Fracture (Acute. avulsion. stress)"	Lower Extremity	2012-2013
206	2012-10-02	F	Basketball	Calf					R	Tendinitis	Lower Extremity	2012-2013
85	2012-10-02	M	Basketball	Hip	"Torn ligaments. prehab program for knee"				L	Strain	Lower Extremity	2012-2013
167	2012-10-09	F	Basketball	Lower Limb	"ATR: Waiting on wrist imaging. will update. has been having wrist taped. Weight Room: As tolerated Sport: As tolerated"				L	Sprain	Lower Extremity	2012-2013
63	2012-10-10	M	Basketball	Achilles tendon					N	Tendinitis	Lower Extremity	2012-2013
11	2012-10-10	F	Basketball	Knee	ATR: using modalities for pain control Weight Room: as tolerated Sport: as tolerated				R	Hyperextension	Lower Extremity	2012-2013
255	2012-10-10	M	Basketball	Lumbar spine					N	Sprains / Strains	Spine	2012-2013
187	2012-10-15	F	Basketball	Ankle	"ATR: working on pain management and function restoration Weight Room: limited to mobility until further notice Sport: limited. will progress as tolerated. Will touch base with coaching staff daily"				R	Sprain	Lower Extremity	2012-2013
141	2012-10-16	F	Basketball	Ankle	ATR: working on inflammation Weight Room: full participation Sport: full participation			Acute	R	Sprain	Lower Extremity	2012-2013
86	2012-10-17	M	Basketball	Shoulder					N	Subluxation / Dislocation	Upper Extremity	2012-2013
98	2012-10-17	F	Basketball	Foot					R	"Strain (Muscle. tendon)"	Lower Extremity	2012-2013
308	2012-10-20	M	Basketball	Brain	Must wear mask until 2/22/2013				N	Concussion	Head	2012-2013
255	2012-10-22	M	Basketball	Hip					R	Contusion	Lower Extremity	2012-2013
177	2012-10-31	M	Basketball	Back	All activity as tolerated. Continue maintenance in ATR.				W	Contusion	Trunk	2012-2013
66	2012-11-07	M	Basketball	Knee					R	Tendonitis	Lower Extremity	2012-2013
378	2012-11-07	F	Basketball	Back	ATR: Will report day to day Weight Room: As tolerated Sport: As tolerated				N	Sprain/Strain	Trunk	2012-2013
255	2012-11-07	M	Basketball	Thumb				Acute	L	Sprain/Strain	Upper Extremity	2012-2013
420	2012-11-19	F	Basketball	Knee					L	Sprain	Lower Extremity	2012-2013
98	2012-11-19	F	Basketball	Eye					R	Unspecified Injury	Head	2012-2013
179	2012-11-24	M	Basketball	Thumb	Following a progressive return to play plan.			Acute	L	Sprain	Upper Extremity	2012-2013
145	2012-12-03	F	Basketball	Elbow					R	Contusion	Upper Extremity	2012-2013
177	2012-12-04	M	Basketball	Hand	All activity as tolerated. Continue maintenance in ATR.				R	Contusion	Upper Extremity	2012-2013
255	2012-12-08	M	Basketball	Hip					L	"Strain (Muscle. tendon)"	Lower Extremity	2012-2013
255	2012-12-14	M	Basketball	Head					N	Concussion	Head	2012-2013
86	2012-12-17	M	Basketball	Ankle					R	Sprain	Lower Extremity	2012-2013
28	2012-12-17	F	Basketball	Lower Leg	ATR: Rehabiliation for lateral ankle strength. Weight Room: Full Participation Sport: Full Participation				R	Strain	Lower Extremity	2012-2013
86	2012-12-28	M	Basketball	Eye				Acute	L	Contusion	Head	2012-2013
467	2013-01-01	F	Basketball	Ankle					L	Tendinitis	Lower Extremity	2012-2013
378	2013-01-01	F	Basketball	Face	ATR: Will report day to day Weight Room: As tolerated Sport: As tolerated				R	Contusion	Head	2012-2013
140	2013-01-01	M	Basketball	Shoulder					R	Sprain	Upper Extremity	2012-2013
33	2013-01-10	F	Basketball	Back	ATR: Pt. underwent a plica removal on the 29th. We have begun her post op care. Weight Room: No weight bearing knee flexion. Sport: No participation				N	Sprain/Strain	Trunk	2012-2013
179	2013-01-11	M	Basketball	Knee	Following a progressive return to play plan.			Acute	L	Contusion	Lower Extremity	2012-2013
86	2013-01-14	M	Basketball	Thigh					L	Contusion	Trunk	2012-2013
177	2013-01-14	M	Basketball	Ankle	All activity as tolerated. Continue maintenance in ATR.				L	Sprain	Lower Extremity	2012-2013
467	2013-01-14	F	Basketball	Nose				Chronic	N	Nose Bleed	Head	2012-2013
140	2013-01-17	M	Basketball	Ankle				Acute	L	Sprain	Lower Extremity	2012-2013
378	2013-01-21	F	Basketball	Thumb	ATR: Will report day to day Weight Room: As tolerated Sport: As tolerated			Acute	R	Sprain	Upper Extremity	2012-2013
66	2013-01-23	M	Basketball	Head				Acute	N	Concussion	Head	2012-2013
540	2013-01-28	M	Basketball	Ankle					N	Sprain	Lower Extremity	2012-2013
420	2013-01-30	F	Basketball	Wrist				Acute	L	Contusion	Upper Extremity	2012-2013
28	2013-02-11	F	Basketball	Cervical Spine	ATR: Rehabiliation for lateral ankle strength. Weight Room: Full Participation Sport: Full Participation			Acute	N	Unclassified	Spine	2012-2013
582	2013-02-12	M	Basketball	Knee	ATC working on pain control and range of motion				B	Tendinitis	Lower Extremity	2012-2013
308	2013-02-14	M	Basketball	Lower Back	Must wear mask until 2/22/2013				B	Sprain	Trunk	2012-2013
378	2013-02-15	F	Basketball	Lower Leg	ATR: Will report day to day Weight Room: As tolerated Sport: As tolerated				L	Tendinitis	Lower Extremity	2012-2013
141	2013-02-23	F	Basketball	Wrist	ATR: working on inflammation Weight Room: full participation Sport: full participation			Acute	R	Sprain	Upper Extremity	2012-2013
467	2013-02-28	F	Basketball	Shoulder				Acute	R	Sprain	Upper Extremity	2012-2013
86	2013-03-08	M	Basketball	Knee				Acute	L	Sprain	Lower Extremity	2012-2013
145	2013-03-10	F	Basketball	Ankle				Acute	R	Sprain	Lower Extremity	2012-2013
647	2013-04-01	M	Basketball	Knee	All activity as tolerated. Limit Reps in practice and work in a day off/ light practice day during the practice week as permitted. Decrease load and volume of lower body lifting (squat and olympic lifts) in weight room and focus on hip stability and eccentric quad strength and control.			Acute	L	Contusion	Lower Extremity	2012-2013
141	2013-04-24	F	Basketball	Lower Back	ATR: working on inflammation Weight Room: full participation Sport: full participation			Acute	L	Pain	Trunk	2012-2013
206	2013-04-25	F	Basketball	Neck				Acute	R	Strain	Head	2012-2013
63	2013-04-26	M	Basketball	Rotator Cuff				Acute	L	Sprain/Strain	Upper Extremity	2012-2013
420	2013-04-29	F	Basketball	Knee				Sub-Acute	R	Tendinitis	Lower Extremity	2012-2013
167	2013-04-30	F	Basketball	Wrist	"ATR: Waiting on wrist imaging. will update. has been having wrist taped. Weight Room: As tolerated Sport: As tolerated"			Sub-Acute	R	Strain	Upper Extremity	2012-2013
25	2013-05-03	F	Basketball	Ankle	ATR: Working on tissue integrity Weight Room: Full Sport: Must be taped before any activity			Acute	R	Sprain	Lower Extremity	2012-2013
582	2013-07-31	M	Basketball	Hip	ATC working on pain control and range of motion			Sub-Acute	R	Unspecified Injury	Lower Extremity	2012-2013
308	2013-08-29	M	Basketball	Ankle	Must wear mask until 2/22/2013				R	Sprain	Lower Extremity	2013-2014
737	2013-09-09	M	Basketball	Lower Back				Chronic	B	Spasm	Trunk	2013-2014
33	2013-09-10	F	Basketball	Knee	ATR: Pt. underwent a plica removal on the 29th. We have begun her post op care. Weight Room: No weight bearing knee flexion. Sport: No participation			Acute	R	Knee Pain	Lower Extremity	2013-2014
748	2013-09-17	F	Basketball	Thumb	ATR: Working on preventative hip mobility Weight Room: Full Participation Sport: Full Participation				L	"Fracture (Acute. avulsion. stress)"	Upper Extremity	2013-2014
750	2013-09-20	F	Basketball	Knee	ATR: Pt. is rehabbing 3-4x weekly Weight Room: Back modification group. Sport: As tolerated. No extra running.				R	ITB Syndrome	Lower Extremity	2013-2014
748	2013-09-26	F	Basketball	Hip	ATR: Working on preventative hip mobility Weight Room: Full Participation Sport: Full Participation				B	Joint	Lower Extremity	2013-2014
750	2013-10-01	F	Basketball	Head	ATR: Pt. is rehabbing 3-4x weekly Weight Room: Back modification group. Sport: As tolerated. No extra running.				N	Concussion	Head	2013-2014
11	2013-10-10	F	Basketball	Back	ATR: using modalities for pain control Weight Room: as tolerated Sport: as tolerated				B	Pain	Trunk	2013-2014
582	2013-10-21	M	Basketball	Coccyx	ATC working on pain control and range of motion				N	Contusion	Spine	2013-2014
818	2013-10-25	M	Basketball	Ankle	All activity as tolerated. Protective goggles for activity is left up to him according to Ophthalmologist.				R	Pain	Lower Extremity	2013-2014
167	2013-10-25	F	Basketball	Hamstring	"ATR: Waiting on wrist imaging. will update. has been having wrist taped. Weight Room: As tolerated Sport: As tolerated"				R	Spasm	Lower Extremity	2013-2014
832	2013-11-02	F	Basketball	Knee	ATR: Rehabbing 2-3x weekly. Weight Room: Full Participation. Sport: Full Participation. Will add in deceleration court work 2x weekly.			Acute	R	Rupture	Lower Extremity	2013-2014
140	2013-11-04	M	Basketball	Lower Back					R	Spasm	Trunk	2013-2014
255	2013-11-04	M	Basketball	Lower Back					B	Spasm	Trunk	2013-2014
855	2013-11-13	M	Basketball	Shoulder				Acute	L	"Cartilage Injury (Articular. labrum. meniscus. rib)"	Upper Extremity	2013-2014
378	2013-11-18	F	Basketball	Ankle	ATR: Will report day to day Weight Room: As tolerated Sport: As tolerated				R	Sprain	Lower Extremity	2013-2014
187	2013-12-02	F	Basketball	Shoulder	"ATR: working on pain management and function restoration Weight Room: limited to mobility until further notice Sport: limited. will progress as tolerated. Will touch base with coaching staff daily"				R	Impingement	Upper Extremity	2013-2014
647	2013-12-03	M	Basketball	Wrist	All activity as tolerated. Limit Reps in practice and work in a day off/ light practice day during the practice week as permitted. Decrease load and volume of lower body lifting (squat and olympic lifts) in weight room and focus on hip stability and eccentric quad strength and control.				R	Strain	Upper Extremity	2013-2014
187	2013-12-07	F	Basketball	Nose	"ATR: working on pain management and function restoration Weight Room: limited to mobility until further notice Sport: limited. will progress as tolerated. Will touch base with coaching staff daily"				N	Contusion	Head	2013-2014
141	2013-12-12	F	Basketball	Achiles tendon	ATR: working on inflammation Weight Room: full participation Sport: full participation				B	Tendinitis	Lower Extremity	2013-2014
748	2014-01-14	F	Basketball	Shoulder	ATR: Working on preventative hip mobility Weight Room: Full Participation Sport: Full Participation				R	Pain	Upper Extremity	2013-2014
141	2014-01-15	F	Basketball	Back	ATR: working on inflammation Weight Room: full participation Sport: full participation				R	Pain	Trunk	2013-2014
85	2014-01-22	M	Basketball	SI joint	"Torn ligaments. prehab program for knee"				L	Pain	Spine	2013-2014
582	2014-01-28	M	Basketball	Hamstring	ATC working on pain control and range of motion				L	Strain	Lower Extremity	2013-2014
187	2014-02-01	F	Basketball	Back	"ATR: working on pain management and function restoration Weight Room: limited to mobility until further notice Sport: limited. will progress as tolerated. Will touch base with coaching staff daily"				B	Contusion	Trunk	2013-2014
378	2014-02-04	F	Basketball	Head	ATR: Will report day to day Weight Room: As tolerated Sport: As tolerated				N	Concussion	Head	2013-2014
750	2014-03-03	F	Basketball	Leg	ATR: Pt. is rehabbing 3-4x weekly Weight Room: Back modification group. Sport: As tolerated. No extra running.				L	Inflammation	Lower Extremity	2013-2014
135	2014-03-12	M	Basketball	Tibia/Shin	Maintenance treatments as needed				B	Tendinosis	Lower Extremity	2013-2014
255	2014-05-28	M	Basketball	Neck				Acute	B	Spasm	Head	2013-2014
28	2014-08-11	F	Basketball	Ankle	ATR: Rehabiliation for lateral ankle strength. Weight Room: Full Participation Sport: Full Participation			Sub-Acute	L	"Strain (Muscle. tendon)"	Lower Extremity	2014-2015
1053	2014-08-27	F	Basketball	Shins	ATR: Working on joint mobility restrictions and lower leg and hip strengthening. She will be seeing our foot ortho tomorrow. Weight Room: Avoid plyometric or loaded axial load of the tibia. Sport: She will work back in to practice/scrimmaging. No open gym and please substitute bike for running during conditioning.				B	Inflammation	Lower Extremity	2014-2015
1062	2014-09-08	F	Basketball	Patella	ATR: Working on Restoring Strength and ROM. Weight Room: Avoid excessive dorsiflexion and plyometric work. Sport: As Tolerated.			Chronic	L	Tendinitis	Lower Extremity	2014-2015
1064	2014-09-09	F	Basketball	Patella	ATR: Rehabbing 3-4x weekly Weight Room: Continue to progress as tolerated. Sport: Continue to progress as tolerated.			Chronic	N	Tendonitis	Lower Extremity	2014-2015
1066	2014-09-11	M	Basketball	Ankle	Ok for all activity to tolerance. Add in extra ankle strength and proprioceptive exercises.			Acute	R	Sprain/Strain	Lower Extremity	2014-2015
1067	2014-09-11	F	Basketball	Wrist	ATR: Rehabbing 3-4x weekly. Weight Room: Back modification lift criteria. Sport: As tolerated. No extra running. Limit contact.			Chronic	L	Cyst	Upper Extremity	2014-2015
1072	2014-09-12	M	Basketball	Thoracic spine	all activity as tolerated.			Sub-Acute	N	Abrasion	Spine	2014-2015
855	2014-09-17	M	Basketball	Thigh					R	Strain	Trunk	2014-2015
1100	2014-10-07	M	Basketball	Ankle	Progress all basketball activity as tolerated. Waiting on knee brace before progressing live basketball activity. Limit reps of basketball and conditioning drills and increase as endurance improves. Continue work in ATR.			Acute	L	Sprain/Strain	Lower Extremity	2014-2015
1072	2014-10-08	M	Basketball	Nose	all activity as tolerated.				N	Fracture	Head	2014-2015
647	2014-10-08	M	Basketball	Calf	All activity as tolerated. Limit Reps in practice and work in a day off/ light practice day during the practice week as permitted. Decrease load and volume of lower body lifting (squat and olympic lifts) in weight room and focus on hip stability and eccentric quad strength and control.				R	Spasm	Lower Extremity	2014-2015
1105	2014-10-08	M	Basketball	SI joint	No full contact basketball activity for remainder of quarter. Ok for all conditioning and strength training. Decrease Load or maintain current loads with weights. Do not increase load with lifting for remainder of quarter. Will f/u w/ Team Physician in 2 weeks. All activity as tolerated. Continue maintenance in ATR. Continue Bench press progression.				R	Sprain	Spine	2014-2015
1117	2014-10-10	F	Basketball	Foot	"ATR: Working on keeping back and hip musculature mobile. Weight Room: Avoid trunk flexion under load for the remainder of season. Sport: As Tolerated. limit contact during the week.No extra running."				L	Pain	Lower Extremity	2014-2015
1127	2014-10-13	F	Basketball	Foot	ATR: Rehabbing 2x weekly for maintenance of foot. Weight Room: Full participation Sport: Full participation				B	Plantar Fascitis	Lower Extremity	2014-2015
855	2014-10-15	M	Basketball	Ankle left					N	Sprain	Lower Extremity	2014-2015
647	2014-10-15	M	Basketball	Head	All activity as tolerated. Limit Reps in practice and work in a day off/ light practice day during the practice week as permitted. Decrease load and volume of lower body lifting (squat and olympic lifts) in weight room and focus on hip stability and eccentric quad strength and control.				N	Concussion	Head	2014-2015
1133	2014-10-15	M	Basketball	Hip					R	Strain	Lower Extremity	2014-2015
1067	2014-10-15	F	Basketball	Ankle	ATR: Rehabbing 3-4x weekly. Weight Room: Back modification lift criteria. Sport: As tolerated. No extra running. Limit contact.			Acute	R	Sprain	Lower Extremity	2014-2015
1154	2014-10-18	F	Basketball	Foot	"ATR: Rehabbing 5x weekly. Weight Room: No LE for the next two weeks. will reassess at that point.. May do L leg SL work and all UE. core and back. Must be braced at all times. Sport: No participation."				B	Plantar Fascitis	Lower Extremity	2014-2015
855	2014-10-21	M	Basketball	Lower Back				Sub-Acute	L	Spasm	Trunk	2014-2015
1105	2014-10-21	M	Basketball	Shoulder	No full contact basketball activity for remainder of quarter. Ok for all conditioning and strength training. Decrease Load or maintain current loads with weights. Do not increase load with lifting for remainder of quarter. Will f/u w/ Team Physician in 2 weeks. All activity as tolerated. Continue maintenance in ATR. Continue Bench press progression.			Sub-Acute	R	"Cartilage Injury (Articular. labrum. meniscus. rib)"	Upper Extremity	2014-2015
1064	2014-10-29	F	Basketball	Lower Leg	ATR: Rehabbing 3-4x weekly Weight Room: Continue to progress as tolerated. Sport: Continue to progress as tolerated.				L	"Fracture (Acute. avulsion. stress)"	Lower Extremity	2014-2015
1127	2014-11-03	F	Basketball	Shoulder	ATR: Rehabbing 2x weekly for maintenance of foot. Weight Room: Full participation Sport: Full participation				L	Sprain/Strain	Upper Extremity	2014-2015
1067	2014-11-05	F	Basketball	Head	ATR: Rehabbing 3-4x weekly. Weight Room: Back modification lift criteria. Sport: As tolerated. No extra running. Limit contact.				N	Concussion	Head	2014-2015
1067	2014-11-05	F	Basketball	Knee	ATR: Rehabbing 3-4x weekly. Weight Room: Back modification lift criteria. Sport: As tolerated. No extra running. Limit contact.				L	Tendinitis	Lower Extremity	2014-2015
1067	2014-11-05	F	Basketball	Back	ATR: Rehabbing 3-4x weekly. Weight Room: Back modification lift criteria. Sport: As tolerated. No extra running. Limit contact.				R	Spasm	Trunk	2014-2015
1072	2014-11-06	M	Basketball	Ankle	all activity as tolerated.			Acute	L	Sprain	Lower Extremity	2014-2015
28	2014-11-11	F	Basketball	Tricep	ATR: Rehabiliation for lateral ankle strength. Weight Room: Full Participation Sport: Full Participation			Acute	R	Contusion	Upper Extremity	2014-2015
832	2014-11-11	F	Basketball	Shoulder	ATR: Rehabbing 2-3x weekly. Weight Room: Full Participation. Sport: Full Participation. Will add in deceleration court work 2x weekly.			Acute	R	Pain	Upper Extremity	2014-2015
1105	2014-11-22	M	Basketball	Hip	No full contact basketball activity for remainder of quarter. Ok for all conditioning and strength training. Decrease Load or maintain current loads with weights. Do not increase load with lifting for remainder of quarter. Will f/u w/ Team Physician in 2 weeks. All activity as tolerated. Continue maintenance in ATR. Continue Bench press progression.			Acute	R	Strain	Lower Extremity	2014-2015
25	2014-11-25	F	Basketball	Finger	ATR: Working on tissue integrity Weight Room: Full Sport: Must be taped before any activity				R	"Fracture (Acute. avulsion. stress)"	Upper Extremity	2014-2015
1133	2014-12-01	M	Basketball	Back				Acute	L	Strain	Trunk	2014-2015
1066	2014-12-08	M	Basketball	Shoulder	Ok for all activity to tolerance. Add in extra ankle strength and proprioceptive exercises.				R	Instability	Upper Extremity	2014-2015
832	2014-12-09	F	Basketball	Back	ATR: Rehabbing 2-3x weekly. Weight Room: Full Participation. Sport: Full Participation. Will add in deceleration court work 2x weekly.			Acute	B	Sprain/Strain	Trunk	2014-2015
378	2014-12-11	F	Basketball	Foot	ATR: Will report day to day Weight Room: As tolerated Sport: As tolerated			Acute	B	Plantar Fascitis	Lower Extremity	2014-2015
1062	2014-12-13	F	Basketball	Head	ATR: Working on Restoring Strength and ROM. Weight Room: Avoid excessive dorsiflexion and plyometric work. Sport: As Tolerated.				N	Concussion	Head	2014-2015
647	2014-12-14	M	Basketball	Thumb	All activity as tolerated. Limit Reps in practice and work in a day off/ light practice day during the practice week as permitted. Decrease load and volume of lower body lifting (squat and olympic lifts) in weight room and focus on hip stability and eccentric quad strength and control.			Acute	L	Sprain/Strain	Upper Extremity	2014-2015
1127	2014-12-19	F	Basketball	Hip	ATR: Rehabbing 2x weekly for maintenance of foot. Weight Room: Full participation Sport: Full participation				R	"Strain (Muscle. tendon)"	Lower Extremity	2014-2015
1100	2014-12-22	M	Basketball	Hamstring	Progress all basketball activity as tolerated. Waiting on knee brace before progressing live basketball activity. Limit reps of basketball and conditioning drills and increase as endurance improves. Continue work in ATR.			Acute	R	Strain	Lower Extremity	2014-2015
167	2015-01-12	F	Basketball	Back	"ATR: Waiting on wrist imaging. will update. has been having wrist taped. Weight Room: As tolerated Sport: As tolerated"				N	Pain	Trunk	2014-2015
818	2015-01-14	M	Basketball	Shoulder	All activity as tolerated. Protective goggles for activity is left up to him according to Ophthalmologist.			Acute	R	Sprain	Upper Extremity	2014-2015
582	2015-01-27	M	Basketball	SI joint	ATC working on pain control and range of motion				L	Sprain	Spine	2014-2015
1100	2015-01-30	M	Basketball	Lower Back	Progress all basketball activity as tolerated. Waiting on knee brace before progressing live basketball activity. Limit reps of basketball and conditioning drills and increase as endurance improves. Continue work in ATR.			Acute	B	Spasm	Trunk	2014-2015
750	2015-02-02	F	Basketball	Thoracic spine	ATR: Pt. is rehabbing 3-4x weekly Weight Room: Back modification group. Sport: As tolerated. No extra running.			Chronic	N	Pain	Spine	2014-2015
177	2015-02-22	M	Basketball	Head	All activity as tolerated. Continue maintenance in ATR.				N	Concussion	Head	2014-2015
855	2015-03-11	M	Basketball	Neck				Acute	R	Strain	Head	2014-2015
647	2015-04-07	M	Basketball	Groin	All activity as tolerated. Limit Reps in practice and work in a day off/ light practice day during the practice week as permitted. Decrease load and volume of lower body lifting (squat and olympic lifts) in weight room and focus on hip stability and eccentric quad strength and control.			Acute	L	Strain	Trunk	2014-2015
1067	2015-04-27	F	Basketball	Thoracic spine	ATR: Rehabbing 3-4x weekly. Weight Room: Back modification lift criteria. Sport: As tolerated. No extra running. Limit contact.				W	Unspecified Injury	Spine	2014-2015
1154	2015-04-30	F	Basketball	Lower Back	"ATR: Rehabbing 5x weekly. Weight Room: No LE for the next two weeks. will reassess at that point.. May do L leg SL work and all UE. core and back. Must be braced at all times. Sport: No participation."				R		Trunk	2014-2015
1105	2015-04-30	M	Basketball	Head	No full contact basketball activity for remainder of quarter. Ok for all conditioning and strength training. Decrease Load or maintain current loads with weights. Do not increase load with lifting for remainder of quarter. Will f/u w/ Team Physician in 2 weeks. All activity as tolerated. Continue maintenance in ATR. Continue Bench press progression.			Acute	N	Concussion	Head	2014-2015
1062	2015-05-01	F	Basketball	Toes	ATR: Working on Restoring Strength and ROM. Weight Room: Avoid excessive dorsiflexion and plyometric work. Sport: As Tolerated.			Chronic	R	Sprain/Strain	Lower Extremity	2014-2015
1127	2015-05-06	F	Basketball	Achilles tendon	ATR: Rehabbing 2x weekly for maintenance of foot. Weight Room: Full participation Sport: Full participation				L	Inflammation	Lower Extremity	2014-2015
1072	2015-05-15	M	Basketball	Back	all activity as tolerated.			Acute	B	Strain	Trunk	2014-2015
1066	2015-05-28	M	Basketball	Shoulder	Ok for all activity to tolerance. Add in extra ankle strength and proprioceptive exercises.			Acute	L	Impingement	Upper Extremity	2014-2015
1398	2015-09-04	F	Basketball	Knee	"ATR: Hasn't rehabbed over the course of the week. Weight Room: Non-impact conditioning group. Upper extremity. core. and posterior chain lifts. Sport: Limited."				B	Tendonitis	Lower Extremity	2015-2016
1072	2015-09-09	M	Basketball	Tibia	all activity as tolerated.			Chronic	R	Fracture	Lower Extremity	2015-2016
818	2015-09-10	M	Basketball	Thigh	All activity as tolerated. Protective goggles for activity is left up to him according to Ophthalmologist.			Sub-Acute	B	Tendinitis	Trunk	2015-2016
1100	2015-09-11	M	Basketball	Back	Progress all basketball activity as tolerated. Waiting on knee brace before progressing live basketball activity. Limit reps of basketball and conditioning drills and increase as endurance improves. Continue work in ATR.				L	Strain	Trunk	2015-2016
1400	2015-09-15	F	Basketball	Knee	ATR: Rehabbing shoulder daily to continue building shoulder strength. Weight Room: No OH activity over 90. Sport: Progression to non-contact activity. No extra running. No back pedaling.			Sub-Acute	B	Patella Femoral Pain Syndrome	Lower Extremity	2015-2016
1401	2015-09-17	F	Basketball	Thigh	ATR: Rehab 3x weekly for back and shoulder. Weight Room: Full participation. Sport: Full participation.			Acute	L	Strain	Trunk	2015-2016
1403	2015-09-21	M	Basketball	SI joint	All basketball activity to tolerance. Limit contact and transition activity as needed. Supplement Exercise bike for running/sprints during conditioning as needed. All weight room activity as tolerated.				L		Spine	2015-2016
1406	2015-09-22	M	Basketball	Knee	"All activity as tolerated. Ok for all lower body lifting exercises. Avoid deep squats. Focus on quad eccentrics."			Acute	L	bursitis	Lower Extremity	2015-2016
1408	2015-09-22	M	Basketball	Calcaneus	All Activity as tolerated.			Acute	R	Contusion	Lower Extremity	2015-2016
1413	2015-09-23	M	Basketball	Hand	Working on Active motion in ATR. Follow up w/ Ortho on 2.27.18. No activity involving use of L hand/wrist in Weight Room. OK for all well arm exercises and exercises using L arm that doesn't require gripping or use of hand/wrist.			Acute	L	Strain	Upper Extremity	2015-2016
750	2015-09-25	F	Basketball	Sacrum	ATR: Pt. is rehabbing 3-4x weekly Weight Room: Back modification group. Sport: As tolerated. No extra running.				M	Strain	Spine	2015-2016
1398	2015-09-30	F	Basketball	Back	"ATR: Hasn't rehabbed over the course of the week. Weight Room: Non-impact conditioning group. Upper extremity. core. and posterior chain lifts. Sport: Limited."			Chronic	M	Unclassified	Trunk	2015-2016
1443	2015-10-06	F	Basketball	Muscle	ATR: Rehabbing 1-2x a week. Weight Room: Full Participation. Hip flexion strengthening recommended. Sport: Full Participation.				R	Strain	Lower Extremity	2015-2016
1413	2015-10-07	M	Basketball	Thigh	Working on Active motion in ATR. Follow up w/ Ortho on 2.27.18. No activity involving use of L hand/wrist in Weight Room. OK for all well arm exercises and exercises using L arm that doesn't require gripping or use of hand/wrist.			Acute	L	Strain	Trunk	2015-2016
1449	2015-10-08	M	Basketball	Lower Limb				Acute	R	"Strain (Muscle. tendon)"	Lower Extremity	2015-2016
1408	2015-10-09	M	Basketball	Thigh	All Activity as tolerated.			Acute	R	Strain	Trunk	2015-2016
1154	2015-10-14	F	Basketball	SI joint	"ATR: Rehabbing 5x weekly. Weight Room: No LE for the next two weeks. will reassess at that point.. May do L leg SL work and all UE. core and back. Must be braced at all times. Sport: No participation."				N	Pain	Spine	2015-2016
1413	2015-10-14	M	Basketball	Head	Working on Active motion in ATR. Follow up w/ Ortho on 2.27.18. No activity involving use of L hand/wrist in Weight Room. OK for all well arm exercises and exercises using L arm that doesn't require gripping or use of hand/wrist.				N		Head	2015-2016
1492	2015-10-19	M	Basketball	Lower Leg	All activity as tolerated.			Acute	L	Contusion	Lower Extremity	2015-2016
1398	2015-10-26	F	Basketball	Foot	"ATR: Hasn't rehabbed over the course of the week. Weight Room: Non-impact conditioning group. Upper extremity. core. and posterior chain lifts. Sport: Limited."				R	Plantar Fascitis	Lower Extremity	2015-2016
1400	2015-10-27	F	Basketball	Back	ATR: Rehabbing shoulder daily to continue building shoulder strength. Weight Room: No OH activity over 90. Sport: Progression to non-contact activity. No extra running. No back pedaling.				W		Trunk	2015-2016
1401	2015-10-27	F	Basketball	Lower Back	ATR: Rehab 3x weekly for back and shoulder. Weight Room: Full participation. Sport: Full participation.				B	Pain	Trunk	2015-2016
255	2015-10-28	M	Basketball	Thoracic spine				Acute	R	Spasm	Spine	2015-2016
1403	2015-11-09	M	Basketball	Toe	All basketball activity to tolerance. Limit contact and transition activity as needed. Supplement Exercise bike for running/sprints during conditioning as needed. All weight room activity as tolerated.				R	Inflammatory	Lower Extremity	2015-2016
1492	2015-11-13	M	Basketball	Thigh	All activity as tolerated.				N	Tendinitis	Trunk	2015-2016
1569	2015-12-01	F	Basketball	Foot	ATR: Rehabbing 3-4X weekly. Taping for competition. Weight Room: Caution with loaded dorsiflexion. Sport: Will discuss participation daily.			Chronic	R	Plantar Fascitis	Lower Extremity	2015-2016
1492	2015-12-13	M	Basketball	Achiles tendon	All activity as tolerated.				R	"Strain (Muscle. tendon)"	Lower Extremity	2015-2016
1580	2015-12-13	M	Basketball	Thumb	"Stay in 2 vs. 2 Live basketball activity. Will follow up with ortho on 3.12.18. He can continue to progress all upper body lifting in weight room. avoiding wide grip pull ups. Extra focus on Rotator Cuff stability. All activity as tolerated. Focusing on Pain control and quad activation in ATR. Once Pain free begin Quad hypertrophy program."			Acute	R	Sprain	Upper Extremity	2015-2016
1408	2015-12-17	M	Basketball	Finger	All Activity as tolerated.			Acute	L	Fracture	Upper Extremity	2015-2016
1492	2015-12-19	M	Basketball	Jaw	All activity as tolerated.			Acute	L	Inflammation	Head	2015-2016
1403	2015-12-28	M	Basketball	Achilles tendon	All basketball activity to tolerance. Limit contact and transition activity as needed. Supplement Exercise bike for running/sprints during conditioning as needed. All weight room activity as tolerated.			Acute	L	Inflammation	Lower Extremity	2015-2016
1400	2016-01-01	F	Basketball	Head	ATR: Rehabbing shoulder daily to continue building shoulder strength. Weight Room: No OH activity over 90. Sport: Progression to non-contact activity. No extra running. No back pedaling.			Acute	N	Concussion	Head	2015-2016
1062	2016-01-04	F	Basketball	Forearm	ATR: Working on Restoring Strength and ROM. Weight Room: Avoid excessive dorsiflexion and plyometric work. Sport: As Tolerated.				R	General Medicine	Upper Extremity	2015-2016
1067	2016-01-05	F	Basketball	Back	ATR: Rehabbing 3-4x weekly. Weight Room: Back modification lift criteria. Sport: As tolerated. No extra running. Limit contact.				B	Strain	Trunk	2015-2016
1580	2016-01-12	M	Basketball	Ankle	"Stay in 2 vs. 2 Live basketball activity. Will follow up with ortho on 3.12.18. He can continue to progress all upper body lifting in weight room. avoiding wide grip pull ups. Extra focus on Rotator Cuff stability. All activity as tolerated. Focusing on Pain control and quad activation in ATR. Once Pain free begin Quad hypertrophy program."				R	Sprain/Strain	Lower Extremity	2015-2016
1400	2016-01-26	F	Basketball	Knee	ATR: Rehabbing shoulder daily to continue building shoulder strength. Weight Room: No OH activity over 90. Sport: Progression to non-contact activity. No extra running. No back pedaling.				L	Pain	Lower Extremity	2015-2016
1117	2016-02-02	F	Basketball	Back	"ATR: Working on keeping back and hip musculature mobile. Weight Room: Avoid trunk flexion under load for the remainder of season. Sport: As Tolerated. limit contact during the week.No extra running."				W	"Disc Injury (herniation. degeneration)"	Trunk	2015-2016
1401	2016-02-04	F	Basketball	Hand	ATR: Rehab 3x weekly for back and shoulder. Weight Room: Full participation. Sport: Full participation.				L	Sprain/Strain	Upper Extremity	2015-2016
1401	2016-02-05	F	Basketball	Ankle	ATR: Rehab 3x weekly for back and shoulder. Weight Room: Full participation. Sport: Full participation.				R	Strain	Lower Extremity	2015-2016
1413	2016-02-16	M	Basketball	Foot	Working on Active motion in ATR. Follow up w/ Ortho on 2.27.18. No activity involving use of L hand/wrist in Weight Room. OK for all well arm exercises and exercises using L arm that doesn't require gripping or use of hand/wrist.				R	Sprain	Lower Extremity	2015-2016
1580	2016-02-16	M	Basketball	Knee	"Stay in 2 vs. 2 Live basketball activity. Will follow up with ortho on 3.12.18. He can continue to progress all upper body lifting in weight room. avoiding wide grip pull ups. Extra focus on Rotator Cuff stability. All activity as tolerated. Focusing on Pain control and quad activation in ATR. Once Pain free begin Quad hypertrophy program."				L	Tendinitis	Lower Extremity	2015-2016
1066	2016-02-28	M	Basketball	Head	Ok for all activity to tolerance. Add in extra ankle strength and proprioceptive exercises.			Acute	N	Concussion	Head	2015-2016
1492	2016-04-04	M	Basketball	Elbow	All activity as tolerated.			Acute	R	Sprain/Strain	Upper Extremity	2015-2016
750	2016-04-11	F	Basketball	SI joint	ATR: Pt. is rehabbing 3-4x weekly Weight Room: Back modification group. Sport: As tolerated. No extra running.				B	Pain	Spine	2015-2016
1408	2016-04-25	M	Basketball	Achiles tendon	All Activity as tolerated.				L	Tendinitis	Lower Extremity	2015-2016
1580	2016-05-05	M	Basketball	Back	"Stay in 2 vs. 2 Live basketball activity. Will follow up with ortho on 3.12.18. He can continue to progress all upper body lifting in weight room. avoiding wide grip pull ups. Extra focus on Rotator Cuff stability. All activity as tolerated. Focusing on Pain control and quad activation in ATR. Once Pain free begin Quad hypertrophy program."				L	Spasm	Trunk	2015-2016
1400	2016-05-11	F	Basketball	Shoulder	ATR: Rehabbing shoulder daily to continue building shoulder strength. Weight Room: No OH activity over 90. Sport: Progression to non-contact activity. No extra running. No back pedaling.				R	Subluxation / Dislocation	Upper Extremity	2015-2016
1703	2016-05-12	F	Basketball	Ankle					L	Sprain	Lower Extremity	2015-2016
1127	2016-05-19	F	Basketball	Back	ATR: Rehabbing 2x weekly for maintenance of foot. Weight Room: Full participation Sport: Full participation				L	Skin Disorder	Trunk	2015-2016
1401	2016-05-19	F	Basketball	Buttock	ATR: Rehab 3x weekly for back and shoulder. Weight Room: Full participation. Sport: Full participation.				R	Strain	Trunk	2015-2016
1413	2016-05-23	M	Basketball	Rotator Cuff	Working on Active motion in ATR. Follow up w/ Ortho on 2.27.18. No activity involving use of L hand/wrist in Weight Room. OK for all well arm exercises and exercises using L arm that doesn't require gripping or use of hand/wrist.			Chronic	R	Strain	Upper Extremity	2015-2016
1744	2016-09-12	M	Basketball	Knee					L	Sprain	Lower Extremity	2016-2017
1064	2016-09-14	F	Basketball	Groin	ATR: Rehabbing 3-4x weekly Weight Room: Continue to progress as tolerated. Sport: Continue to progress as tolerated.				R	"Strain (Muscle. tendon)"	Trunk	2016-2017
1072	2016-09-15	M	Basketball	Thoracic spine	all activity as tolerated.				B	Muscle	Spine	2016-2017
647	2016-09-16	M	Basketball	Back	All activity as tolerated. Limit Reps in practice and work in a day off/ light practice day during the practice week as permitted. Decrease load and volume of lower body lifting (squat and olympic lifts) in weight room and focus on hip stability and eccentric quad strength and control.				R	Spasm	Trunk	2016-2017
1401	2016-09-16	F	Basketball	Spine	ATR: Rehab 3x weekly for back and shoulder. Weight Room: Full participation. Sport: Full participation.				B		Spine	2016-2017
1100	2016-09-16	M	Basketball	Back	Progress all basketball activity as tolerated. Waiting on knee brace before progressing live basketball activity. Limit reps of basketball and conditioning drills and increase as endurance improves. Continue work in ATR.				W	Spasm	Trunk	2016-2017
1749	2016-09-16	F	Basketball	Knee	"ATR: Rehabbing 5x weekly. Weight Room: Full Participation. Sport: Continue to progresse participation in practice. Full court and contact ok. with subs. Will add in deceleration court work 2x weekly."				R	Rupture	Lower Extremity	2016-2017
1443	2016-09-16	F	Basketball	Ankle	ATR: Rehabbing 1-2x a week. Weight Room: Full Participation. Hip flexion strengthening recommended. Sport: Full Participation.				L	Sprain	Lower Extremity	2016-2017
1753	2016-09-19	F	Basketball	Knee	ATR: Rehabbing 2-3X weekly. Weight Room: As tolerated. Sport: As tolerated.				B		Lower Extremity	2016-2017
1154	2016-09-21	F	Basketball	Patella	"ATR: Rehabbing 5x weekly. Weight Room: No LE for the next two weeks. will reassess at that point.. May do L leg SL work and all UE. core and back. Must be braced at all times. Sport: No participation."				N	Tendinitis	Lower Extremity	2016-2017
1762	2016-09-23	M	Basketball	Knee	All activity to tolerance			Acute	L	Inflammation	Lower Extremity	2016-2017
1763	2016-09-24	F	Basketball	Foot / Ankle	"ATR: Daily treatment. Weight Room: As tolerated. caution with push/pull patterns that would affect the pec. Please watch for accessory breathing. Sport: Limit contact during the week. Must wear padding for competition."				B	Inflammation	Lower Extremity	2016-2017
1749	2016-10-06	F	Basketball	Hip	"ATR: Rehabbing 5x weekly. Weight Room: Full Participation. Sport: Continue to progresse participation in practice. Full court and contact ok. with subs. Will add in deceleration court work 2x weekly."				L	"Strain (Muscle. tendon)"	Lower Extremity	2016-2017
1799	2016-10-07	M	Basketball	Foot	"All Activity to tolerance. Limit reps in full contact activity as needed. In Weight room. Avoid back squats and supplement with the PitShark. Limit Hyper extension activity. incorporate extra rotational stability. core strengthening. and glute activation."				R	"Strain (Muscle. tendon)"	Lower Extremity	2016-2017
1744	2016-10-12	M	Basketball	Lower Leg					R	"Strain (Muscle. tendon)"	Lower Extremity	2016-2017
1811	2016-10-12	M	Basketball	Hamstring	All activity to tolerance.				L	Strain	Lower Extremity	2016-2017
1580	2016-10-16	M	Basketball	Thoracic spine	"Stay in 2 vs. 2 Live basketball activity. Will follow up with ortho on 3.12.18. He can continue to progress all upper body lifting in weight room. avoiding wide grip pull ups. Extra focus on Rotator Cuff stability. All activity as tolerated. Focusing on Pain control and quad activation in ATR. Once Pain free begin Quad hypertrophy program."				L	Strain	Spine	2016-2017
1763	2016-10-17	F	Basketball	Leg	"ATR: Daily treatment. Weight Room: As tolerated. caution with push/pull patterns that would affect the pec. Please watch for accessory breathing. Sport: Limit contact during the week. Must wear padding for competition."				R	Strain	Lower Extremity	2016-2017
1569	2016-10-18	F	Basketball	Achiles tendon	ATR: Rehabbing 3-4X weekly. Taping for competition. Weight Room: Caution with loaded dorsiflexion. Sport: Will discuss participation daily.				L	Tendonitis	Lower Extremity	2016-2017
1819	2016-10-19	F	Basketball	Ankle / foot	ATR: Rehab 1-2x weekly. Weight Room: Full participation. Sport: As tolerated.				B	Tendonitis	Lower Extremity	2016-2017
1401	2016-10-21	F	Basketball	Ankle	ATR: Rehab 3x weekly for back and shoulder. Weight Room: Full participation. Sport: Full participation.				L	Sprain	Lower Extremity	2016-2017
1569	2016-10-21	F	Basketball	Thigh	ATR: Rehabbing 3-4X weekly. Taping for competition. Weight Room: Caution with loaded dorsiflexion. Sport: Will discuss participation daily.				L	Strain	Trunk	2016-2017
1823	2016-10-23	F	Basketball	Toe	ATR: No rehab needed. Coming in for pad/tape job. Weight Room: Full participation. Sport: Full participation.				B	Blister	Lower Extremity	2016-2017
1811	2016-10-25	M	Basketball	Ankle	All activity to tolerance.				R	Sprain	Lower Extremity	2016-2017
1443	2016-10-26	F	Basketball	Thigh	ATR: Rehabbing 1-2x a week. Weight Room: Full Participation. Hip flexion strengthening recommended. Sport: Full Participation.				L	Pain	Trunk	2016-2017
1762	2016-11-05	M	Basketball	Toe	All activity to tolerance			Acute	R	"Strain (Muscle. tendon)"	Lower Extremity	2016-2017
1763	2016-11-05	F	Basketball	Thumb	"ATR: Daily treatment. Weight Room: As tolerated. caution with push/pull patterns that would affect the pec. Please watch for accessory breathing. Sport: Limit contact during the week. Must wear padding for competition."				L	Sprain	Upper Extremity	2016-2017
1064	2016-11-05	F	Basketball	Shoulder	ATR: Rehabbing 3-4x weekly Weight Room: Continue to progress as tolerated. Sport: Continue to progress as tolerated.				L	Impingement	Upper Extremity	2016-2017
1799	2016-11-05	M	Basketball	Teeth	"All Activity to tolerance. Limit reps in full contact activity as needed. In Weight room. Avoid back squats and supplement with the PitShark. Limit Hyper extension activity. incorporate extra rotational stability. core strengthening. and glute activation."			Acute	W		Head	2016-2017
1154	2016-11-08	F	Basketball	Hamstring	"ATR: Rehabbing 5x weekly. Weight Room: No LE for the next two weeks. will reassess at that point.. May do L leg SL work and all UE. core and back. Must be braced at all times. Sport: No participation."			Acute	R	Strain	Lower Extremity	2016-2017
1811	2016-11-09	M	Basketball	Hip	All activity to tolerance.				B	Muscular Imbalance	Lower Extremity	2016-2017
1871	2016-11-11	F	Basketball	Wrist	ATR: Maintenance. Taping for competition only. Weight Room: Full participation Sport: Full participation				R	Crushing	Upper Extremity	2016-2017
1871	2016-11-11	F	Basketball	Ankle	ATR: Maintenance. Taping for competition only. Weight Room: Full participation Sport: Full participation				R	Sprain	Lower Extremity	2016-2017
1401	2016-11-14	F	Basketball	Shoulder	ATR: Rehab 3x weekly for back and shoulder. Weight Room: Full participation. Sport: Full participation.				R	Pain	Upper Extremity	2016-2017
1569	2016-11-23	F	Basketball	Head	ATR: Rehabbing 3-4X weekly. Taping for competition. Weight Room: Caution with loaded dorsiflexion. Sport: Will discuss participation daily.				N	Concussion	Head	2016-2017
1067	2016-11-26	F	Basketball	Shoulder	ATR: Rehabbing 3-4x weekly. Weight Room: Back modification lift criteria. Sport: As tolerated. No extra running. Limit contact.				R	Sprain/Strain	Upper Extremity	2016-2017
1066	2016-12-04	M	Basketball	Back	Ok for all activity to tolerance. Add in extra ankle strength and proprioceptive exercises.			Acute	B	Spasm	Trunk	2016-2017
1763	2016-12-06	F	Basketball	Chest	"ATR: Daily treatment. Weight Room: As tolerated. caution with push/pull patterns that would affect the pec. Please watch for accessory breathing. Sport: Limit contact during the week. Must wear padding for competition."				R	Pain	Trunk	2016-2017
1413	2016-12-06	M	Basketball	Back	Working on Active motion in ATR. Follow up w/ Ortho on 2.27.18. No activity involving use of L hand/wrist in Weight Room. OK for all well arm exercises and exercises using L arm that doesn't require gripping or use of hand/wrist.				R	Strain	Trunk	2016-2017
1799	2016-12-10	M	Basketball	Back	"All Activity to tolerance. Limit reps in full contact activity as needed. In Weight room. Avoid back squats and supplement with the PitShark. Limit Hyper extension activity. incorporate extra rotational stability. core strengthening. and glute activation."			Chronic	L	Spasm	Trunk	2016-2017
1902	2016-12-13	F	Basketball	Ankle	ATR: Rehabbing daily. Weight Room: Full Participation Sport:Full Participation. There is no reason she shouldn't be participating in full practices at this point.				L	Sprain	Lower Extremity	2016-2017
1403	2016-12-15	M	Basketball	Back	All basketball activity to tolerance. Limit contact and transition activity as needed. Supplement Exercise bike for running/sprints during conditioning as needed. All weight room activity as tolerated.			Acute	L	Spasm/Cramp	Trunk	2016-2017
1753	2016-12-16	F	Basketball	Ankle	ATR: Rehabbing 2-3X weekly. Weight Room: As tolerated. Sport: As tolerated.				L	Sprain/Strain	Lower Extremity	2016-2017
1127	2016-12-28	F	Basketball	Stomach	ATR: Rehabbing 2x weekly for maintenance of foot. Weight Room: Full participation Sport: Full participation				N		Trunk	2016-2017
1127	2016-12-29	F	Basketball	Stomach	ATR: Rehabbing 2x weekly for maintenance of foot. Weight Room: Full participation Sport: Full participation				R	Pain	Trunk	2016-2017
832	2016-12-29	F	Basketball	Knee	ATR: Rehabbing 2-3x weekly. Weight Room: Full Participation. Sport: Full Participation. Will add in deceleration court work 2x weekly.				L	Meniscal injury/tear	Lower Extremity	2016-2017
1763	2017-01-03	F	Basketball	Chest/T-spine/Ribs	"ATR: Daily treatment. Weight Room: As tolerated. caution with push/pull patterns that would affect the pec. Please watch for accessory breathing. Sport: Limit contact during the week. Must wear padding for competition."				B	Inflammation	Spine	2016-2017
1569	2017-01-09	F	Basketball	Ankle	ATR: Rehabbing 3-4X weekly. Taping for competition. Weight Room: Caution with loaded dorsiflexion. Sport: Will discuss participation daily.				B	Sprain	Lower Extremity	2016-2017
818	2017-01-20	M	Basketball	Eye	All activity as tolerated. Protective goggles for activity is left up to him according to Ophthalmologist.			Acute	L	Abrasion	Head	2016-2017
1443	2017-01-31	F	Basketball	Shoulder	ATR: Rehabbing 1-2x a week. Weight Room: Full Participation. Hip flexion strengthening recommended. Sport: Full Participation.				B	Muscular Imbalance	Upper Extremity	2016-2017
1154	2017-02-02	F	Basketball	Ankle	"ATR: Rehabbing 5x weekly. Weight Room: No LE for the next two weeks. will reassess at that point.. May do L leg SL work and all UE. core and back. Must be braced at all times. Sport: No participation."				L	Sprain/Strain	Lower Extremity	2016-2017
1492	2017-02-05	M	Basketball	Head	All activity as tolerated.				N	Unspecified Injury	Head	2016-2017
1799	2017-02-06	M	Basketball	Thoracic spine	"All Activity to tolerance. Limit reps in full contact activity as needed. In Weight room. Avoid back squats and supplement with the PitShark. Limit Hyper extension activity. incorporate extra rotational stability. core strengthening. and glute activation."				L	"Strain (Muscle. tendon)"	Spine	2016-2017
1492	2017-02-22	M	Basketball	Hand	All activity as tolerated.			Acute	L	Sprain	Upper Extremity	2016-2017
1066	2017-03-01	M	Basketball	Ankle	Ok for all activity to tolerance. Add in extra ankle strength and proprioceptive exercises.			Acute	L	Sprain/Strain	Lower Extremity	2016-2017
1401	2017-03-06	F	Basketball	Head	ATR: Rehab 3x weekly for back and shoulder. Weight Room: Full participation. Sport: Full participation.				N	Concussion	Head	2016-2017
1763	2017-03-12	F	Basketball	Ankle	"ATR: Daily treatment. Weight Room: As tolerated. caution with push/pull patterns that would affect the pec. Please watch for accessory breathing. Sport: Limit contact during the week. Must wear padding for competition."				L	Sprain	Lower Extremity	2016-2017
1154	2017-03-13	F	Basketball	Neck	"ATR: Rehabbing 5x weekly. Weight Room: No LE for the next two weeks. will reassess at that point.. May do L leg SL work and all UE. core and back. Must be braced at all times. Sport: No participation."				N	Pain	Head	2016-2017
2018	2017-04-11	F	Basketball	Hamstring					L	Strain	Lower Extremity	2016-2017
1823	2017-04-18	F	Basketball	Hip	ATR: No rehab needed. Coming in for pad/tape job. Weight Room: Full participation. Sport: Full participation.				L	Strain	Lower Extremity	2016-2017
1871	2017-04-26	F	Basketball	Knee	ATR: Maintenance. Taping for competition only. Weight Room: Full participation Sport: Full participation				L		Lower Extremity	2016-2017
1401	2017-05-11	F	Basketball	Patella	ATR: Rehab 3x weekly for back and shoulder. Weight Room: Full participation. Sport: Full participation.				N	"Strain (Muscle. tendon)"	Lower Extremity	2016-2017
1443	2017-06-01	F	Basketball	Foot	ATR: Rehabbing 1-2x a week. Weight Room: Full Participation. Hip flexion strengthening recommended. Sport: Full Participation.				B	Plantar Fascitis	Lower Extremity	2016-2017
1066	2017-06-01	M	Basketball	Back	Ok for all activity to tolerance. Add in extra ankle strength and proprioceptive exercises.				R	Sprain	Trunk	2016-2017
1072	2017-08-10	M	Basketball	Toe	all activity as tolerated.			Acute	B	Contusion (Hematoma)	Lower Extremity	2017-2018
1811	2017-08-10	M	Basketball	Lower Back	All activity to tolerance.			Sub-Acute	L	Muscular Imbalance	Trunk	2017-2018
1066	2017-08-10	M	Basketball	Neck	Ok for all activity to tolerance. Add in extra ankle strength and proprioceptive exercises.			Acute	R	Strain	Head	2017-2018
2066	2017-08-16	M	Basketball	Hip	All non contact activity as tolerated. Will reevaluate pre practice tomorrow to determine ability for practice.			Acute	L	Strain	Lower Extremity	2017-2018
1763	2017-09-14	F	Basketball	Shoulder	"ATR: Daily treatment. Weight Room: As tolerated. caution with push/pull patterns that would affect the pec. Please watch for accessory breathing. Sport: Limit contact during the week. Must wear padding for competition."				R	Impingement Syndrome	Upper Extremity	2017-2018
1799	2017-09-27	M	Basketball	Head	"All Activity to tolerance. Limit reps in full contact activity as needed. In Weight room. Avoid back squats and supplement with the PitShark. Limit Hyper extension activity. incorporate extra rotational stability. core strengthening. and glute activation."				N	Concussion	Head	2017-2018
2104	2017-09-27	F	Basketball	Knee	"ATR: Rehabbing 5x weekly. Weight Room: Continue modifications. Limit squat depth to 90 degrees. Continue Alter-G progression. Ground based running in 3-4 weeks. Sport: May participate in the primer. with modifications (self-regulated). Neurofit and rehab activity during practice."				R	Rupture	Lower Extremity	2017-2018
1823	2017-09-29	F	Basketball	Head	ATR: No rehab needed. Coming in for pad/tape job. Weight Room: Full participation. Sport: Full participation.			Acute	N	Concussion	Head	2017-2018
2066	2017-10-03	M	Basketball	Thigh	All non contact activity as tolerated. Will reevaluate pre practice tomorrow to determine ability for practice.				L	Contusion	Trunk	2017-2018
1819	2017-10-09	F	Basketball	Back	ATR: Rehab 1-2x weekly. Weight Room: Full participation. Sport: As tolerated.				N		Trunk	2017-2018
2166	2017-10-19	M	Basketball	Thigh				Acute	L	Contusion	Trunk	2017-2018
1401	2017-10-23	F	Basketball	Back	ATR: Rehab 3x weekly for back and shoulder. Weight Room: Full participation. Sport: Full participation.				W	Unspecified Injury	Trunk	2017-2018
2066	2017-10-24	M	Basketball	Elbow	All non contact activity as tolerated. Will reevaluate pre practice tomorrow to determine ability for practice.			Acute	L	Sprain/Strain	Upper Extremity	2017-2018
2196	2017-10-31	M	Basketball	Lower Leg				Acute	R	Strain	Lower Extremity	2017-2018
1740	2017-11-01	M	Basketball	Lower Back	"Bilateral tendinitis. All activity as tolerated. Avoid aggravating activity. Focus on eccentric quad strength. Hip flexor mobility and flexibility				N	Pain	Trunk	2017-2018
2219	2017-11-06	M	Basketball	Hip	All activity as tolerated. Ok for all Non-Contact Activity until tooth is stabilized. Working on getting a dentist appointment ASAP.			Acute	L	Strain	Lower Extremity	2017-2018
2219	2017-11-12	M	Basketball	Mouth	All activity as tolerated. Ok for all Non-Contact Activity until tooth is stabilized. Working on getting a dentist appointment ASAP.			Acute	N	Laceration	Head	2017-2018
1823	2017-11-13	F	Basketball	Back	ATR: No rehab needed. Coming in for pad/tape job. Weight Room: Full participation. Sport: Full participation.				N	Muscular Imbalance	Trunk	2017-2018
1403	2017-11-20	M	Basketball	Back	All basketball activity to tolerance. Limit contact and transition activity as needed. Supplement Exercise bike for running/sprints during conditioning as needed. All weight room activity as tolerated.				B		Trunk	2017-2018
2259	2017-12-05	M	Basketball	Ankle	All activity as tolerated. Work on ankle strength and proprioception as part of an Individualized adjustment in the weight room.				L	Sprain	Lower Extremity	2017-2018
1066	2018-01-06	M	Basketball	Eye	Ok for all activity to tolerance. Add in extra ankle strength and proprioceptive exercises.				L	Unspecified Injury	Head	2017-2018
1799	2018-01-15	M	Basketball	Back	"All Activity to tolerance. Limit reps in full contact activity as needed. In Weight room. Avoid back squats and supplement with the PitShark. Limit Hyper extension activity. incorporate extra rotational stability. core strengthening. and glute activation."				B	Spasm	Trunk	2017-2018
2018	2018-01-20	F	Basketball	Head					N	Concussion	Head	2017-2018
2299	2018-01-22	F	Basketball	Elbow					R	"Strain (Muscle. tendon)"	Upper Extremity	2017-2018
1072	2018-01-31	M	Basketball	Lower Back	all activity as tolerated.			Chronic	R	Spasm	Trunk	2017-2018
1753	2018-02-01	F	Basketball	Ankle	ATR: Rehabbing 2-3X weekly. Weight Room: As tolerated. Sport: As tolerated.				R	Sprain	Lower Extremity	2017-2018
2018	2018-02-01	F	Basketball	Achilles tendon					R	Tenosynovitis	Lower Extremity	2017-2018
2299	2018-02-19	F	Basketball	Ankle					L	Sprain	Lower Extremity	2017-2018
2066	2018-04-25	M	Basketball	Ankle	All non contact activity as tolerated. Will reevaluate pre practice tomorrow to determine ability for practice.				N	Pain	Lower Extremity	2017-2018
1819	2018-05-16	F	Basketball	Back	ATR: Rehab 1-2x weekly. Weight Room: Full participation. Sport: As tolerated.				B	Spasm	Trunk	2017-2018
2166	2018-05-24	M	Basketball	Calf				Acute	R	Strain	Lower Extremity	2017-2018
1443	2018-07-17	F	Basketball	Thoracic spine	ATR: Rehabbing 1-2x a week. Weight Room: Full Participation. Hip flexion strengthening recommended. Sport: Full Participation.				B	Muscular Imbalance	Spine	2017-2018
1823	2018-09-07	F	Basketball	Knee	ATR: No rehab needed. Coming in for pad/tape job. Weight Room: Full participation. Sport: Full participation.				R	ITB Syndrome	Lower Extremity	2018-2019
2451	2018-09-10	F	Basketball	Knee					L	Pain	Lower Extremity	2018-2019
2299	2018-09-13	F	Basketball	Shins					B	Pain	Lower Extremity	2018-2019
2459	2018-09-18	M	Basketball	Thigh					R	"Strain (Muscle. tendon)"	Trunk	2018-2019
2462	2018-09-19	F	Basketball	Knee					L	Tendinitis	Lower Extremity	2018-2019
2465	2018-09-21	F	Basketball	Lower Leg					L	Tendonitis	Lower Extremity	2018-2019
2468	2018-09-25	M	Basketball	Ankle / foot					R	Unspecified Injury	Lower Extremity	2018-2019
2259	2018-09-27	M	Basketball	Hip	All activity as tolerated. Work on ankle strength and proprioception as part of an Individualized adjustment in the weight room.			Chronic	R	Muscular Imbalance	Lower Extremity	2018-2019
2462	2018-10-01	F	Basketball	Back					W		Trunk	2018-2019
2488	2018-10-02	F	Basketball	Lower Back					B	Muscular Imbalance	Trunk	2018-2019
2492	2018-10-05	F	Basketball	Back					B	Pain	Trunk	2018-2019
1811	2018-10-08	M	Basketball	Shoulder	All activity to tolerance.				L	Subluxation	Upper Extremity	2018-2019
2505	2018-10-10	M	Basketball	Back					W		Trunk	2018-2019
2465	2018-10-14	F	Basketball	Shoulder					R	Muscular Imbalance	Upper Extremity	2018-2019
2505	2018-10-15	M	Basketball	Hip					L	Strain	Lower Extremity	2018-2019
1443	2018-10-19	F	Basketball	Wrist	ATR: Rehabbing 1-2x a week. Weight Room: Full Participation. Hip flexion strengthening recommended. Sport: Full Participation.				L		Upper Extremity	2018-2019
2553	2018-10-24	M	Basketball	Head					N	Concussion	Head	2018-2019
1413	2018-10-25	M	Basketball	Toe	Working on Active motion in ATR. Follow up w/ Ortho on 2.27.18. No activity involving use of L hand/wrist in Weight Room. OK for all well arm exercises and exercises using L arm that doesn't require gripping or use of hand/wrist.				B	Pain	Lower Extremity	2018-2019
1871	2018-10-25	F	Basketball	Back	ATR: Maintenance. Taping for competition only. Weight Room: Full participation Sport: Full participation				N		Trunk	2018-2019
2562	2018-10-25	M	Basketball	Head					N	Concussion	Head	2018-2019
2492	2018-10-26	F	Basketball	Shoulder					R	Strain	Upper Extremity	2018-2019
2459	2018-10-29	M	Basketball	Knee					N		Lower Extremity	2018-2019
2451	2018-10-30	F	Basketball	Back					W		Trunk	2018-2019
1819	2018-11-01	F	Basketball	Head	ATR: Rehab 1-2x weekly. Weight Room: Full participation. Sport: As tolerated.				N	Concussion	Head	2018-2019
2259	2018-11-02	M	Basketball	Back	All activity as tolerated. Work on ankle strength and proprioception as part of an Individualized adjustment in the weight room.				N		Trunk	2018-2019
2166	2018-12-30	M	Basketball	Thigh					R	Strain	Trunk	2018-2019
2066	2019-01-01	M	Basketball	Head	All non contact activity as tolerated. Will reevaluate pre practice tomorrow to determine ability for practice.				N		Head	2018-2019
2451	2019-01-10	F	Basketball	Shoulder					R	Pain	Upper Extremity	2018-2019
2462	2019-01-28	F	Basketball	Biceps					R	Inflammation	Upper Extremity	2018-2019
1569	2019-02-01	F	Basketball	Chest/T-spine/Ribs	ATR: Rehabbing 3-4X weekly. Taping for competition. Weight Room: Caution with loaded dorsiflexion. Sport: Will discuss participation daily.				R	Bruise	Spine	2018-2019
2505	2019-02-02	M	Basketball	Groin					L	Strain	Trunk	2018-2019
1819	2019-02-05	F	Basketball	Forearm	ATR: Rehab 1-2x weekly. Weight Room: Full participation. Sport: As tolerated.				R	Spasm	Upper Extremity	2018-2019
2680	2019-02-08	F	Basketball	Hip					B	ITB Syndrome	Lower Extremity	2018-2019
2468	2019-02-08	M	Basketball	Head					N	Concussion	Head	2018-2019
2066	2019-02-26	M	Basketball	Back	All non contact activity as tolerated. Will reevaluate pre practice tomorrow to determine ability for practice.				R		Trunk	2018-2019
2468	2019-04-12	M	Basketball	Foot					B	Pain	Lower Extremity	2018-2019
1753	2019-04-19	F	Basketball	Body	ATR: Rehabbing 2-3X weekly. Weight Room: As tolerated. Sport: As tolerated.				N		Trunk	2018-2019
2553	2019-04-23	M	Basketball	Hip					R	"Cartilage Injury (Articular. labrum. meniscus. rib)"	Lower Extremity	2018-2019
2166	2019-04-26	M	Basketball	Calf					L	"Strain (Muscle. tendon)"	Lower Extremity	2018-2019
2505	2019-05-10	M	Basketball	Hip					R	Impingement	Lower Extremity	2018-2019
1819	2019-05-23	F	Basketball	Achiles tendon	ATR: Rehab 1-2x weekly. Weight Room: Full participation. Sport: As tolerated.				R	Tendinitis	Lower Extremity	2018-2019
1740	2019-05-29	M	Basketball	Ankle	"Bilateral tendinitis. All activity as tolerated. Avoid aggravating activity. Focus on eccentric quad strength. Hip flexor mobility and flexibility				R	Sprain	Lower Extremity	2018-2019
1819	2019-08-02	F	Basketball	Toe	ATR: Rehab 1-2x weekly. Weight Room: Full participation. Sport: As tolerated.				L	Bruise	Lower Extremity	2019-2020
2799	2019-09-06	M	Basketball	Shoulder					L	Subluxation	Upper Extremity	2019-2020
1740	2019-09-07	M	Basketball	Achiles tendon	"Bilateral tendinitis. All activity as tolerated. Avoid aggravating activity. Focus on eccentric quad strength. Hip flexor mobility and flexibility				L	Tendinitis	Lower Extremity	2019-2020
2802	2019-09-10	F	Basketball	Back					N		Trunk	2019-2020
2803	2019-09-10	F	Basketball	Ankle					N		Lower Extremity	2019-2020
2804	2019-09-10	F	Basketball	Hamstring					N		Lower Extremity	2019-2020
2808	2019-09-12	F	Basketball	Thigh					L	Muscular Imbalance	Trunk	2019-2020
2809	2019-09-13	M	Basketball	Back					W	Pain	Trunk	2019-2020
2803	2019-09-16	F	Basketball	Ankle					R	"Strain (Muscle. tendon)"	Lower Extremity	2019-2020
2809	2019-09-19	M	Basketball	Ankle					L	Sprain	Lower Extremity	2019-2020
2824	2019-09-25	F	Basketball	Foot					L		Lower Extremity	2019-2020
2828	2019-09-26	M	Basketball	Toe				Chronic	R	Inflammation	Lower Extremity	2019-2020
2459	2019-09-26	M	Basketball	Neck					N		Head	2019-2020
1811	2019-09-27	M	Basketball	Hip	All activity to tolerance.				N		Lower Extremity	2019-2020
2845	2019-10-03	M	Basketball	Heart					N		Trunk	2019-2020
2845	2019-10-04	M	Basketball	Foot					R	Sprain	Lower Extremity	2019-2020
2808	2019-10-09	F	Basketball	Foot					L	Sprain/Strain	Lower Extremity	2019-2020
2877	2019-10-13	M	Basketball	Hip					L	Strain	Lower Extremity	2019-2020
2104	2019-10-17	F	Basketball	Lower Leg	"ATR: Rehabbing 5x weekly. Weight Room: Continue modifications. Limit squat depth to 90 degrees. Continue Alter-G progression. Ground based running in 3-4 weeks. Sport: May participate in the primer. with modifications (self-regulated). Neurofit and rehab activity during practice."				B	Pain	Lower Extremity	2019-2020
2803	2019-10-21	F	Basketball	Back					B	Muscular Imbalance	Trunk	2019-2020
2802	2019-10-22	F	Basketball	Head					N	Concussion	Head	2019-2020
2492	2019-10-31	F	Basketball	Knee					L	Tendinitis	Lower Extremity	2019-2020
2845	2019-11-15	M	Basketball	General medicine					N		Miscellaneous	2019-2020
2465	2019-11-25	F	Basketball	Shoulder					L	Pain	Upper Extremity	2019-2020
2804	2019-12-10	F	Basketball	Hand					R	Sprain/Strain	Upper Extremity	2019-2020
2488	2019-12-11	F	Basketball	Ankle					L	Spasm	Lower Extremity	2019-2020
2804	2019-12-19	F	Basketball	Knee					L	Tendinitis	Lower Extremity	2019-2020
2802	2020-01-14	F	Basketball	Ankle					R	Sprain/Strain	Lower Extremity	2019-2020
2462	2020-01-17	F	Basketball	Head					N	Concussion	Head	2019-2020
2804	2020-02-06	F	Basketball	Head					N		Head	2019-2020
3071	2020-02-25	M	Basketball	Hip					R	Inflammation	Lower Extremity	2019-2020
2104	2022-04-21	F	Basketball	Right Lower Leg Foot, Ankle	"SA sent for imaging (X-ray) to rule out fibular fx Possible peroneus longus involvement Possible CFL involvement"	Posterior ankle pain undiagnosed	Right Posterior Ankle AZZP Posterior ankle pain undiagnosed				Lower Extremity	2021-2022
2809	2022-02-21	M	Basketball	Left Lower Arm Hand	concern for fracture vs sprain						Upper Extremity	2021-2022
2799	2022-02-18	M	Basketball	Left Lower Arm Hand	r/o fracture vs contusion						Upper Extremity	2021-2022
2451	2021-12-17	F	Basketball	Left Lower Arm Hand, Hand	Scapholunate ligament tear	Other Wrist and Hand Pain/ Injury not otherwise specified	Left Anterior Hand WZXX Other Wrist and Hand Pain/ Injury not otherwise specified				Upper Extremity	2021-2022
3156	2021-11-23	F	Basketball	Head Neck, Head	SA will see the team physician tomorrow for final diagnosis	Concussion/ Brain Injury	concussion				Head	2021-2022
2104	2021-11-05	F	Basketball	Head Neck, Head	Concussion	Concussion	Left Anterior Head HNCX Concussion				Head	2021-2022
3167	2021-11-05	M	Basketball	Left Upper Leg	Consider bucket handle meniscus tear vs knee contusion						Lower Extremity	2021-2022
3168	2021-11-05	M	Basketball	Left Lower Leg Foot, Ankle	High ankle sprain	Ankle syndesmosis sprain	Left Anterior Ankle AJSX Ankle syndesmosis sprain				Lower Extremity	2021-2022
2824	2021-10-18	F	Basketball	Right Lower Leg Foot	Slight ATFL sprain						Lower Extremity	2021-2022
3156	2021-10-08	F	Basketball	Left Lower Leg Foot	L lateral ankle sprain						Lower Extremity	2021-2022
3198	2021-09-21	F	Basketball	Right Upper Leg							Lower Extremity	2021-2022
3198	2021-09-17	F	Basketball	Right Lumbar	"Hypomobile R SI. tight erector spinae"						Spine	2021-2022
2824	2021-09-13	F	Basketball	Right Upper Leg, Knee	Patellar Tendonitis	Patellar tendinopathy ( excl. Sinding Larsen Johannson syndrome see JTKP)	Right Knee KTPT Patellar tendinopathy ( excl. Sinding Larsen Johannson syndrome see JTKP)				Lower Extremity	2021-2022
2462	2021-08-23	F	Basketball	Right Lower Leg Foot, Lower Leg	Lower leg pain	Lateral compartment muscle injury	Lower leg pain				Lower Extremity	2021-2022
3202	2021-08-04	M	Basketball	Right Chest Shoulder							Upper Extremity	2021-2022
3205	2021-08-13	M	Basketball	Left Upper Leg	Possible fat pad contusion						Lower Extremity	2021-2022
3198	2021-08-11	F	Basketball	Left Lower Leg Foot, Foot	L Plantar Fascitis	Mid/ distal plantar fasiitis	Plantar Fascitis				Lower Extremity	2021-2022
3168	2021-08-12	M	Basketball	Right Posterior Lower Leg Foot	Calf contusion						Lower Extremity	2021-2022
3207	2020-10-27	F	Basketball	Left Upper Leg, Knee	~9.5 months s/p ACL Repair	ACL rupture	ACL Rupture				Lower Extremity	2020-2021
2462	2021-08-06	F	Basketball	Right Lower Leg Foot, Lower Leg	"Lower leg pain; hypomobile calcaneus; posterior lateral tightness. limited dorsiflexion"	Lower leg muscle Injury	Right Anterior Lower Leg QMXX Lower leg muscle Injury				Lower Extremity	2021-2022
2104	2021-08-03	F	Basketball	Left Upper Leg	Meniscus vs. ligamentous injury						Lower Extremity	2021-2022
3210	2021-07-29	F	Basketball	Right Lower Arm Hand, Hand	Oblique Proximal Shaft Fx of the 3rd metacarpal w/ displacement of distal fracture segment	Fracture 3rd metacarpal	Oblique Proximal Shaft Fx of the 3rd metacarpal w/ displacement of distal fracture segment				Upper Extremity	2020-2021
2877	2021-06-22	M	Basketball	Left Pelvis							Trunk	2020-2021
3210	2020-12-05	F	Basketball	Ankle	Strain of Peroneus Longus	Ankle Pain/ Injury not otherwise specified	Right Anterior Ankle AZXX Ankle Pain/ Injury not otherwise specified				Lower Extremity	2020-2021
2104	2020-12-01	F	Basketball	Right Upper Leg, Knee	R ITB irritation	ITB friction syndrome	ITB Friction Syndrome				Lower Extremity	2020-2021
3299	2020-11-16	M	Basketball	Right Pelvis							Trunk	2020-2021
3210	2020-09-18	F	Basketball	Left Lumbar, Lumbar Spine	Low Back Pain	Lumbar Pain/ Injury nor otherwise specified	Lumbar Spine LZXX Lumbar Pain/ Injury nor otherwise specified				Spine	2020-2021
1749	2020-09-28	F	Basketball								Miscellaneous	2020-2021
2451	2020-09-28	F	Basketball	Left Upper Leg							Lower Extremity	2020-2021
3306	2022-02-18	M	Basketball	Other	r/o fracture vs contusion						Upper Extremity	2021-2022
3313	2021-12-20	M	Basketball	Other, Medical Illness MIZX Other infection not otherwise specified			COVID				Miscellaneous	2021-2022
3316	2021-11-24	F	Basketball	Other							Miscellaneous	2021-2022
3325	2021-09-30	M	Basketball	Other, Medical Illness MZZX Other medical illness			COVID				Miscellaneous	2021-2022
3306	2021-09-30	M	Basketball	Other, Medical Illness MZZX Other medical illness			COVID				Miscellaneous	2021-2022
3326	2021-09-20	M	Basketball	Other		Achilles Tendonitis	Achilles Tendonitis				Lower Extremity	2021-2022
3316	2021-08-27	F	Basketball	Other	SI dysfunction on R side						Trunk	2021-2022
3306	2021-08-26	M	Basketball	Other, Medical Illness MZXX Medical Illness Undiagnosed/ Other			Medical Illness MZXX Medical Illness Undiagnosed/ Other				Miscellaneous	2021-2022
3331	2021-08-26	M	Basketball	Other							Miscellaneous	2021-2022
3332	2021-08-24	F	Basketball	Other							Miscellaneous	2021-2022
3334	2021-08-03	F	Basketball	Other	Quadratis Lumborum muscle spasm with muscular imbalances and muscle tightness.						Trunk	2021-2022
3336	2021-08-10	F	Basketball	Other, "Limited Pronation. Limited Toe extension of digits 2-3. 4-5"							Lower Extremity	2021-2022
3331	2021-04-22	M	Basketball	Other, Neck NMYX Neck muscle spasm/ trigger points incl torticollis	"Limited T-spine rotation to L. poor control of deep cervical flexors and serratus"	Left Neck NMYX Neck muscle spasm/ trigger points incl torticollis	Left Neck NMYX Neck muscle spasm/ trigger points incl torticollis				Head	2020-2021
3339	2021-08-12	F	Basketball	Other, Ankle AJLX Ankle lateral ligament sprain		L Lateral Ankle Injury	L Lateral Ankle Injury				Lower Extremity	2021-2022
3340	2021-08-11	F	Basketball	Other	Tendon irritation and lateral patellar tracking due to muscular imbalance						Lower Extremity	2021-2022
3341	2021-03-06	F	Basketball	Other, Ankle AULX Chronic lateral instability	"R lateral ankle crepitus. ankle instability"	Right Anterior Ankle AULX Chronic lateral instability	Right Anterior Ankle AULX Chronic lateral instability				Lower Extremity	2020-2021
3342	2021-08-05	M	Basketball	Other							Lower Extremity	2021-2022
3369	2021-03-16	F	Basketball	Other							Miscellaneous	2020-2021
3325	2021-01-22	M	Basketball	Other							Miscellaneous	2020-2021
3377	2020-12-02	F	Basketball	Other, Knee KTQT Quadriceps tendinopathy		Right Knee KTQT Quadriceps tendinopathy	Right Knee KTQT Quadriceps tendinopathy				Lower Extremity	2020-2021
3314	2020-11-16	M	Basketball	Other							Lower Extremity	2020-2021
3379	2020-11-10	M	Basketball	Other	"SA noticed pain after practice in R hip flexor. finished weights. noticed it getting worse with hip flexion as the night continued. Pain w/ walking and lifting. The pain was worse the next morning. Hurts the most when SA gets into a stance."						Lower Extremity	2020-2021
3383	2020-10-28	M	Basketball	Other							Miscellaneous	2020-2021
3379	2020-10-19	M	Basketball	Other							Miscellaneous	2020-2021
3341	2020-10-19	F	Basketball	Other, Foot FHHU Nail bed haematoma great toe		Right Anterior Foot FHHU Nail bed haematoma great toe	Right Anterior Foot FHHU Nail bed haematoma great toe				Lower Extremity	2020-2021
3392	2020-10-02	M	Basketball	Other							Miscellaneous	2020-2021
3156	2022-08-04	F	Basketball	Lower Extremity	L hip flexor pain						Lower Extremity	2022-2023
2104	2022-08-03	F	Basketball	Lower Extremity							Lower Extremity	2022-2023
3205	2022-07-13	M	Basketball	Lower Extremity							Lower Extremity	2021-2022
2809	2022-06-27	M	Basketball	Trunk							Trunk	2021-2022
3427	2022-05-10	M	Basketball	Thigh TMQX Quadriceps Strain	R Distal Quadriceps Grade I Strain	R Distal Quadriceps Grade I Strain					Lower Extremity	2021-2022
2809	2022-02-21	M	Basketball		concern for fracture vs sprain						Upper Extremity	2021-2022
3210	2021-12-27	F	Basketball	Medical Illness MZZX Other medical illness			COVID 19				Miscellaneous	2021-2022
3207	2021-12-25	F	Basketball	Medical Illness MIZX Other infection not otherwise specified	COVID		COVID				Miscellaneous	2021-2022
3156	2021-11-24	F	Basketball								Miscellaneous	2021-2022
3198	2021-11-24	F	Basketball								Miscellaneous	2021-2022
2104	2021-11-06	F	Basketball								Miscellaneous	2021-2022
2462	2021-10-25	F	Basketball								Miscellaneous	2021-2022
3198	2021-09-17	F	Basketball		"Hypomobile R SI. tight erector spinae"						Trunk	2021-2022
3202	2021-08-26	M	Basketball								Miscellaneous	2021-2022
3202	2021-08-04	M	Basketball								Miscellaneous	2021-2022
3205	2021-08-13	M	Basketball		Possible fat pad contusion						Lower Extremity	2021-2022
2877	2021-06-22	M	Basketball								Miscellaneous	2020-2021
3218	2021-05-19	M	Basketball								Miscellaneous	2020-2021
2451	2020-10-16	F	Basketball								Miscellaneous	2020-2021
3210	2020-09-21	F	Basketball								Miscellaneous	2020-2021
2877	2021-06-22	M	Basketball	Left Pelvis							Trunk	2020-2021
1749	2020-09-28	F	Basketball								Miscellaneous	2020-2021
3306	2022-02-18	M	Basketball	Left Lower Arm Hand	r/o fracture vs contusion						Upper Extremity	2021-2022
3326	2021-09-20	M	Basketball	Left Posterior Lower Leg Foot			Achilles Tendonitis				Lower Extremity	2021-2022
3316	2021-08-27	F	Basketball	Right Posterior Pelvis	SI dysfunction on R side						Lower Extremity	2021-2022
3334	2021-08-03	F	Basketball	Left Lumbar	Quadratis Lumborum muscle spasm with muscular imbalances and muscle tightness.						Lower Extremity	2021-2022
3377	2020-12-01	F	Basketball	Right Upper Leg, Knee	Quad Tendonitis	Quadriceps tendinopathy	Right Knee KTQT Quadriceps tendinopathy; pre strain/ knot in quad				Lower Extremity	2020-2021
3314	2020-11-16	M	Basketball	Right Pelvis							Trunk	2020-2021
3379	2020-11-10	M	Basketball	Right Pelvis	"SA noticed pain after practice in R hip flexor. finished weights. noticed it getting worse with hip flexion as the night continued. Pain w/ walking and lifting. The pain was worse the next morning. Hurts the most when SA gets into a stance."						Lower Extremity	2020-2021
3341	2020-09-11	F	Basketball	Right Lower Leg Foot, Foot	Ingrown toe nail: right great toe.	Nail bed haematoma great toe	Right Anterior Foot FHHU Nail bed haematoma great toe				Lower Extremity	2020-2021
1650	2016-02-08	F	Basketball; Track and Field	Knee	All activity as tolerated. Avoid back squatting movements and progress as tolerated. Avoid heavy hinge movements in weights.			Acute	R	Inflammation	Lower Extremity	2015-2016
1650	2017-01-18	F	Basketball; Track and Field	Lower Back	All activity as tolerated. Avoid back squatting movements and progress as tolerated. Avoid heavy hinge movements in weights.				R	Spasm	Trunk	2016-2017
1650	2017-04-27	F	Basketball; Track and Field	Knee	All activity as tolerated. Avoid back squatting movements and progress as tolerated. Avoid heavy hinge movements in weights.				L	Inflammation	Lower Extremity	2016-2017
10	2011-09-26	F	Crew	Lower Back					N	"Disc Injury (herniation. degeneration)"	Trunk	2011-2012
16	2012-02-01	F	Crew	Tricep	ATR: Working on posture and mobility. She had a follow up with the doctor. He gave her a few ideas to help achieve pain control. I have also given her an at home flexibility plan. Weight Room: As tolerated Sport: As tolerated				R	Tendinitis	Upper Extremity	2011-2012
47	2012-08-03	M	Crew	Knee					R	Tendinitis	Lower Extremity	2012-2013
94	2012-08-22	F	Crew	Arm	I have not seen her in a week or two				R	"Strain (Muscle. tendon)"	Upper Extremity	2012-2013
115	2012-09-01	M	Crew	Rib					L	Subluxation	Trunk	2012-2013
170	2012-09-24	F	Crew	Hip					R	"Cartilage Injury (Articular. labrum. meniscus. rib)"	Lower Extremity	2012-2013
174	2012-09-24	M	Crew	Ankle					R	Sprain	Lower Extremity	2012-2013
175	2012-09-24	M	Crew	Back					B	Pain	Trunk	2012-2013
183	2012-09-27	F	Crew	Coccyx	Haven't heard back from her on progress of imaging				N	Subluxation	Spine	2012-2013
186	2012-09-28	M	Crew	Leg					B	Unclassified	Lower Extremity	2012-2013
188	2012-09-28	M	Crew	Ankle					R	Sprain	Lower Extremity	2012-2013
191	2012-09-29	F	Crew	Lower Back	ATR: Working on rotary stability and trying to achieve pain management. Weight Room: As Tolerated Sport: As Tolerated				B	Pain	Trunk	2012-2013
202	2012-10-02	M	Crew	Elbow					R	Tendonitis	Upper Extremity	2012-2013
217	2012-10-03	M	Crew	Lumbar spine					N	Pain	Spine	2012-2013
220	2012-10-04	M	Crew	Knee					R	Knee Pain	Lower Extremity	2012-2013
230	2012-10-06	M	Crew	Knee					R	Pain	Lower Extremity	2012-2013
247	2012-10-09	M	Crew	Knee					B	Pain	Lower Extremity	2012-2013
262	2012-10-11	M	Crew	Foot					L		Lower Extremity	2012-2013
275	2012-10-15	F	Crew	Lower Back					B		Trunk	2012-2013
94	2012-10-15	F	Crew	Achilles tendon	I have not seen her in a week or two				R	Tendonitis	Lower Extremity	2012-2013
286	2012-10-16	F	Crew	Shoulder	No overhead activities in weightroom.				L	Sprain	Upper Extremity	2012-2013
287	2012-10-17	M	Crew	Thoracic spine					L	Subluxation	Spine	2012-2013
289	2012-10-17	F	Crew	Hand					R	Blister	Upper Extremity	2012-2013
296	2012-10-18	M	Crew	Leg					L	"Strain (Muscle. tendon)"	Lower Extremity	2012-2013
302	2012-10-19	M	Crew	Chest					N	Bruise	Trunk	2012-2013
307	2012-10-20	F	Crew	Back					R	Unclassified	Trunk	2012-2013
307	2012-10-20	F	Crew	Knee					R	Tendinitis	Lower Extremity	2012-2013
321	2012-10-24	M	Crew	Shoulder					L	Joint	Upper Extremity	2012-2013
336	2012-10-29	M	Crew	Rib					L	Subluxation	Trunk	2012-2013
346	2012-10-31	F	Crew	Hip	ATR: Continue to work on mobility. Strength: No Restrictions Sport: No Restrictions				R	"Strain (Muscle. tendon)"	Lower Extremity	2012-2013
362	2012-11-02	M	Crew	Knee					L	ITB Syndrome	Lower Extremity	2012-2013
363	2012-11-02	M	Crew	Knee					R	Patella Femoral Pain Syndrome	Lower Extremity	2012-2013
376	2012-11-06	M	Crew	Shins					R	stress reaction	Lower Extremity	2012-2013
380	2012-11-07	F	Crew	Shoulder					L	Impingement	Upper Extremity	2012-2013
380	2012-11-08	F	Crew	Thigh					R	Contusion	Trunk	2012-2013
385	2012-11-09	M	Crew	Back					W	Pain	Trunk	2012-2013
191	2012-11-09	F	Crew	Rib	ATR: Working on rotary stability and trying to achieve pain management. Weight Room: As Tolerated Sport: As Tolerated				L	Fracture	Trunk	2012-2013
394	2012-11-10	M	Crew	Back					N	Strain	Trunk	2012-2013
394	2012-11-10	M	Crew	Foot / Ankle					L	Unspecified Injury	Lower Extremity	2012-2013
397	2012-11-10	F	Crew	Skin					L	Abrasion	Miscellaneous	2012-2013
399	2012-11-13	M	Crew	Metatarsal					R	stress reaction	Lower Extremity	2012-2013
409	2012-11-15	F	Crew	Hip	"Improving. slight pain at end of practice 11/19 AM."				R	Pain	Lower Extremity	2012-2013
412	2012-11-16	M	Crew	Calf					L	Strain	Lower Extremity	2012-2013
414	2012-11-16	M	Crew	Groin					L	Strain	Trunk	2012-2013
262	2012-11-16	M	Crew	Rib					L	Subluxation	Trunk	2012-2013
416	2012-11-17	M	Crew	Hamstring					L	Strain	Lower Extremity	2012-2013
421	2012-11-19	F	Crew	Thoracic spine	Continue with 14 day PCSS				L	Pain	Spine	2012-2013
423	2012-11-19	F	Crew	Wrist					L	Subluxation	Upper Extremity	2012-2013
424	2012-11-19	F	Crew	Back					W	Pain	Trunk	2012-2013
296	2012-11-27	M	Crew	Lower Back					B	Sprain	Trunk	2012-2013
170	2012-11-27	F	Crew	Neck					R	Spasm	Head	2012-2013
433	2012-11-27	M	Crew	Knee					L	Tenosynovitis	Lower Extremity	2012-2013
443	2012-11-30	F	Crew	Rib	ATR: Pt. is working on core strength and posture correction. Weight ROOM: Be cautious of form and weight choice. SPORT: As tolerated.				R	Subluxation	Trunk	2012-2013
433	2012-11-30	M	Crew	Head					N	Concussion	Head	2012-2013
449	2012-12-03	M	Crew	Back					N	"Disc Injury (herniation. degeneration)"	Trunk	2012-2013
220	2012-12-04	M	Crew	Abdomen					R	Contusion	Trunk	2012-2013
454	2012-12-06	F	Crew	Ankle	ATR: Continue with rehab 2-3x's per week. Weights: As Tolerated Sport: As Tolerated				R	Pain	Lower Extremity	2012-2013
455	2012-12-06	F	Crew	Ankle					R	Sprain	Lower Extremity	2012-2013
457	2012-12-07	F	Crew	Rib	ATR: Continue to work on flexibility and increase back strength. Weight Room: Full Participation Sport: Full Participation				L	Pain	Trunk	2012-2013
458	2012-12-08	M	Crew	Shoulder					R	Tendinitis	Upper Extremity	2012-2013
459	2012-12-10	F	Crew	Back				Chronic	B	Spasm	Trunk	2012-2013
474	2013-01-07	F	Crew	Knee					R	Contusion	Lower Extremity	2012-2013
476	2013-01-07	F	Crew	Knee					L	Tendinitis	Lower Extremity	2012-2013
188	2013-01-09	M	Crew	Rib					N	Subluxation	Trunk	2012-2013
483	2013-01-10	M	Crew	Cervical Root Nerve					N	Impingement	Spine	2012-2013
458	2013-01-10	M	Crew	Hip					B	Muscular Imbalance	Lower Extremity	2012-2013
488	2013-01-11	F	Crew	Back					L	Spasm	Trunk	2012-2013
346	2013-01-11	F	Crew	Wrist	ATR: Continue to work on mobility. Strength: No Restrictions Sport: No Restrictions			Acute	L		Upper Extremity	2012-2013
416	2013-01-14	M	Crew	Back					R	Pain	Trunk	2012-2013
496	2013-01-14	F	Crew	Thumb					L	Strain	Upper Extremity	2012-2013
506	2013-01-16	F	Crew	Knee				Sub-Acute	R	Joint	Lower Extremity	2012-2013
488	2013-01-16	F	Crew	Forearm				Acute	L	Strain	Upper Extremity	2012-2013
509	2013-01-16	F	Crew	Back					L	Subluxation	Trunk	2012-2013
458	2013-01-16	M	Crew	Rib				Acute	L	Subluxation	Trunk	2012-2013
230	2013-01-18	M	Crew	Arm					R	Contusion	Upper Extremity	2012-2013
518	2013-01-21	F	Crew	Knee	"ATR: Working on strength. power development. and proprioception Weight Room: As Tolerated Sport: As Tolerated"			Acute	R	Rupture	Lower Extremity	2012-2013
346	2013-01-23	F	Crew	Back	ATR: Continue to work on mobility. Strength: No Restrictions Sport: No Restrictions			Acute	R	Strain	Trunk	2012-2013
496	2013-01-23	F	Crew	Rib				Acute	L	Strain	Trunk	2012-2013
533	2013-01-25	F	Crew	Knee					L	Knee Pain	Lower Extremity	2012-2013
539	2013-01-28	M	Crew	Lower Back				Acute	N	Muscular Imbalance	Trunk	2012-2013
289	2013-01-29	F	Crew	Lower Back				Chronic	R	Pain	Trunk	2012-2013
546	2013-01-30	F	Crew	Forearm				Acute	B	Strain	Upper Extremity	2012-2013
547	2013-01-30	F	Crew	Arm	ATR: I spoke with Caitlyn and her wrist is still bugging her but she does not have time to make it in for treatment. I gave her directions on self treatment and encouraged her to wear a wrist support brace that I gave to her a few weeks ago. Weight Room: Full Participation Sport: Full Participation			Acute	B	Sprain	Upper Extremity	2012-2013
533	2013-02-06	F	Crew	Neck					N	Pain	Head	2012-2013
564	2013-02-06	M	Crew	Wrist					L		Upper Extremity	2012-2013
567	2013-02-07	M	Crew	Rib				Acute	R		Trunk	2012-2013
443	2013-02-08	F	Crew	Hamstring	ATR: Pt. is working on core strength and posture correction. Weight ROOM: Be cautious of form and weight choice. SPORT: As tolerated.			Acute	R	"Strain (Muscle. tendon)"	Lower Extremity	2012-2013
574	2013-02-08	F	Crew	Thigh				Acute	L	Sprain	Trunk	2012-2013
94	2013-02-12	F	Crew	Knee	I have not seen her in a week or two				B	Tendinitis	Lower Extremity	2012-2013
458	2013-02-16	M	Crew	Shoulder				Acute	L		Upper Extremity	2012-2013
191	2013-02-19	F	Crew	Rib	ATR: Working on rotary stability and trying to achieve pain management. Weight Room: As Tolerated Sport: As Tolerated				R	Unclassified	Trunk	2012-2013
597	2013-02-21	F	Crew	Knee	ATR: Encouraged calf and hamstring stretching. Weight Room: Full Participation Sport: Full Participation			Chronic	L	Muscular Imbalance	Lower Extremity	2012-2013
567	2013-02-21	M	Crew	Knee				Acute	B		Lower Extremity	2012-2013
459	2013-02-22	F	Crew	Thoracic spine				Sub-Acute	L	Subluxation	Spine	2012-2013
363	2013-02-23	M	Crew	Knee				Acute	L	ITB Syndrome	Lower Extremity	2012-2013
574	2013-02-25	F	Crew	Hip					L	Strain	Lower Extremity	2012-2013
605	2013-02-25	M	Crew	Ankle					L	Contusion	Lower Extremity	2012-2013
607	2013-02-25	F	Crew	Head				Acute	N	Concussion	Head	2012-2013
170	2013-02-26	F	Crew	Back				Acute	R	Sprain	Trunk	2012-2013
488	2013-02-28	F	Crew	Shoulder				Acute	R		Upper Extremity	2012-2013
94	2013-03-01	F	Crew	Rib	I have not seen her in a week or two			Sub-Acute	L	Subluxation	Trunk	2012-2013
115	2013-03-01	M	Crew	Arm					L	"Strain (Muscle. tendon)"	Upper Extremity	2012-2013
620	2013-03-05	F	Crew	Hamstring				Acute	L	Sprain/Strain	Lower Extremity	2012-2013
488	2013-03-06	F	Crew	Knee					B	ITB Syndrome	Lower Extremity	2012-2013
496	2013-03-06	F	Crew	Unclassified				Acute	L	Unclassified	Miscellaneous	2012-2013
183	2013-03-07	F	Crew	Scapula	Haven't heard back from her on progress of imaging				L	Pain	Upper Extremity	2012-2013
363	2013-03-08	M	Crew	Thigh					L	Tendonitis	Trunk	2012-2013
183	2013-03-11	F	Crew	Thoracic spine	Haven't heard back from her on progress of imaging				L		Spine	2012-2013
636	2013-03-13	F	Crew	Back	She has no showed us this week.			Acute	B	Strain	Trunk	2012-2013
642	2013-03-25	M	Crew	Neck/Cervical Spine				Acute	L	Spasm	Spine	2012-2013
643	2013-03-26	F	Crew	Hip				Acute	L	"Strain (Muscle. tendon)"	Lower Extremity	2012-2013
454	2013-03-28	F	Crew	Hamstring	ATR: Continue with rehab 2-3x's per week. Weights: As Tolerated Sport: As Tolerated				L	Strain	Lower Extremity	2012-2013
645	2013-03-28	F	Crew	Hamstring					L	Unclassified	Lower Extremity	2012-2013
443	2013-03-29	F	Crew	Hamstring	ATR: Pt. is working on core strength and posture correction. Weight ROOM: Be cautious of form and weight choice. SPORT: As tolerated.			Sub-Acute	L	Unspecified Injury	Lower Extremity	2012-2013
620	2013-03-29	F	Crew	Knee				Acute	R	ITB Syndrome	Lower Extremity	2012-2013
476	2013-03-30	F	Crew	Knee					R	Pain	Lower Extremity	2012-2013
188	2013-04-01	M	Crew	Forearm				Acute	R	Tendinitis	Upper Extremity	2012-2013
457	2013-04-01	F	Crew	Neck	ATR: Continue to work on flexibility and increase back strength. Weight Room: Full Participation Sport: Full Participation			Acute	B	Spasm	Head	2012-2013
649	2013-04-02	F	Crew	Neck				Acute	B		Head	2012-2013
533	2013-04-04	F	Crew	Thoracic spine				Sub-Acute	R	Pain	Spine	2012-2013
659	2013-04-10	M	Crew	Lower Back					R	Sprain	Trunk	2012-2013
289	2013-04-10	F	Crew	Foot					B	Pain	Lower Extremity	2012-2013
488	2013-04-11	F	Crew	Rib					R	Strain	Trunk	2012-2013
362	2013-04-11	M	Crew	Wrist				Acute	R	Tenosynovitis	Upper Extremity	2012-2013
533	2013-04-12	F	Crew	Thigh					L	Skin Infection	Trunk	2012-2013
597	2013-04-12	F	Crew	Thigh	ATR: Encouraged calf and hamstring stretching. Weight Room: Full Participation Sport: Full Participation			Acute	R	Muscular Imbalance	Trunk	2012-2013
289	2013-04-16	F	Crew	Back					L	Pain	Trunk	2012-2013
674	2013-04-18	M	Crew	Wrist				Acute	L	Fracture	Upper Extremity	2012-2013
457	2013-04-18	F	Crew	Back	ATR: Continue to work on flexibility and increase back strength. Weight Room: Full Participation Sport: Full Participation				R	Unspecified Injury	Trunk	2012-2013
620	2013-05-02	F	Crew	Back					L	Muscle	Trunk	2012-2013
217	2013-05-06	M	Crew	Hand				Acute	R	Nerve	Upper Extremity	2012-2013
191	2013-05-13	F	Crew	Ankle / foot	ATR: Working on rotary stability and trying to achieve pain management. Weight Room: As Tolerated Sport: As Tolerated			Chronic	R	Tendinosis	Lower Extremity	2012-2013
539	2013-05-13	M	Crew	Back					R	Pain	Trunk	2012-2013
496	2013-05-21	F	Crew	Wrist				Sub-Acute	R	Bone	Upper Extremity	2012-2013
16	2013-05-23	F	Crew	Foot	ATR: Working on posture and mobility. She had a follow up with the doctor. He gave her a few ideas to help achieve pain control. I have also given her an at home flexibility plan. Weight Room: As tolerated Sport: As tolerated			Sub-Acute	R	stress reaction	Lower Extremity	2012-2013
186	2013-06-04	M	Crew	Chest				Acute	N		Trunk	2012-2013
183	2013-07-12	F	Crew	Foot	Haven't heard back from her on progress of imaging			Acute	R	Sprain	Lower Extremity	2012-2013
183	2013-08-23	F	Crew	Hip	Haven't heard back from her on progress of imaging				L	Pain	Lower Extremity	2013-2014
564	2013-09-30	M	Crew	Lumbar spine					B	Sprain/Strain	Spine	2013-2014
296	2013-10-01	M	Crew	Foot					R	Open Wound	Lower Extremity	2013-2014
764	2013-10-02	F	Crew	Leg	Haven't Seen in 2 Weeks				B	Nerve	Lower Extremity	2013-2014
773	2013-10-04	F	Crew	Knee				Chronic	B	Chondramalacia	Lower Extremity	2013-2014
776	2013-10-07	M	Crew	Head					N	Laceration	Head	2013-2014
780	2013-10-07	F	Crew	Calf	ATR: Work on reducing muscle spasm and correcting posture. Weight Room: As Tolerated Sport: As Tolerated.				R	Tendinosis	Lower Extremity	2013-2014
496	2013-10-10	F	Crew	Shoulder					B	Instability	Upper Extremity	2013-2014
792	2013-10-11	M	Crew	Back	ATR - been coming to ATR for stretching/ modalities; started exercises 10_15_2013 Weights - no exercises that load spine; avoid exercises requiring trunk flexion Sport - as tolerated				B	Muscular Imbalance	Trunk	2013-2014
802	2013-10-16	M	Crew	Spine				Sub-Acute	R	Nerve	Spine	2013-2014
496	2013-10-16	F	Crew	Back					R	Strain	Trunk	2013-2014
806	2013-10-17	M	Crew	Back					L	Spasm	Trunk	2013-2014
809	2013-10-18	M	Crew	Knee				Acute	R	ITB Syndrome	Lower Extremity	2013-2014
815	2013-10-23	F	Crew	Ankle	Not seen since Eval.				L	Sprain	Lower Extremity	2013-2014
817	2013-10-25	F	Crew	Knee	ATR: She's been coming in when her shoulder becomes too painful or tight. Mainly we have been working with her to get her muscles relaxed and loose. Sport: Row as tolerated				L	ITB Syndrome	Lower Extremity	2013-2014
376	2013-10-31	M	Crew	Back					B	Spasm	Trunk	2013-2014
829	2013-11-02	F	Crew	Chest	ATR: Working on flexibility and hip alignment. Following up with Chiro on her own due to MD suggestions. Weight Room: Be cautious when loading into flexion Sport: Full Participation			Acute	R	Spasm	Trunk	2013-2014
831	2013-11-02	M	Crew	Ankle					R	Sprain	Lower Extremity	2013-2014
833	2013-11-02	F	Crew	Lower Back	Hasn't been in the ATR for two month now.			Acute	R	Spasm	Trunk	2013-2014
840	2013-11-07	F	Crew	Back	ATR: She has IT band tightness and is working on VMO strengthening Weight Room: Full Participation Sport: Full Participation				R	Impingement	Trunk	2013-2014
843	2013-11-08	F	Crew	Arm	I have not seen her in a week or two				L	Muscle	Upper Extremity	2013-2014
776	2013-11-09	M	Crew	Hip					L	Strain	Lower Extremity	2013-2014
443	2013-11-09	F	Crew	Lower Back	ATR: Pt. is working on core strength and posture correction. Weight ROOM: Be cautious of form and weight choice. SPORT: As tolerated.			Sub-Acute	B	Spasm	Trunk	2013-2014
230	2013-11-09	M	Crew	Back					W	Bone	Trunk	2013-2014
848	2013-11-09	M	Crew	Lower Back					B	Pain	Trunk	2013-2014
849	2013-11-11	M	Crew	Back					N	Muscular Imbalance	Trunk	2013-2014
851	2013-11-12	M	Crew	Lower Back					L	Spasm	Trunk	2013-2014
853	2013-11-12	F	Crew	Lower Back	Sport: As Tolerated			Sub-Acute	B	Strain	Trunk	2013-2014
857	2013-11-14	F	Crew	Rib	ATR: Hasn't been seen yet this quarter Weight Room: Full Participation Sport: Full Participation				L	Subluxation	Trunk	2013-2014
860	2013-11-15	F	Crew	Knee	I have not seen her in a week.			Acute	L	Sprain	Lower Extremity	2013-2014
861	2013-11-15	M	Crew	Knee					R	ITB Syndrome	Lower Extremity	2013-2014
636	2013-11-16	F	Crew	Back	She has no showed us this week.				N	Pain	Trunk	2013-2014
454	2013-11-18	F	Crew	Bicep	ATR: Continue with rehab 2-3x's per week. Weights: As Tolerated Sport: As Tolerated			Acute	R	Impingement	Upper Extremity	2013-2014
780	2013-11-19	F	Crew	Hamstring	ATR: Work on reducing muscle spasm and correcting posture. Weight Room: As Tolerated Sport: As Tolerated.				L	Muscle	Lower Extremity	2013-2014
833	2013-11-20	F	Crew	Hip	Hasn't been in the ATR for two month now.				R		Lower Extremity	2013-2014
94	2013-11-22	F	Crew	Shoulder	I have not seen her in a week or two			Acute	L	Tendonitis	Upper Extremity	2013-2014
518	2014-01-06	F	Crew	Back	"ATR: Working on strength. power development. and proprioception Weight Room: As Tolerated Sport: As Tolerated"				R	"Strain (Muscle. tendon)"	Trunk	2013-2014
861	2014-01-07	M	Crew	Testicle					N	Pain	Miscellaneous	2013-2014
889	2014-01-08	M	Crew	Hamstring					B	"Strain (Muscle. tendon)"	Lower Extremity	2013-2014
893	2014-01-08	M	Crew	Hip					L	Tendonitis	Lower Extremity	2013-2014
895	2014-01-09	F	Crew	Hip	ATR: Was seen for muscle imbalance once and I haven't seen her since.				L	Spasm	Lower Extremity	2013-2014
849	2014-01-09	M	Crew	Back					R	Unspecified Injury	Trunk	2013-2014
776	2014-01-09	M	Crew	Shoulder					R	"Strain (Muscle. tendon)"	Upper Extremity	2013-2014
902	2014-01-10	M	Crew	Ankle					L	Sprain	Lower Extremity	2013-2014
903	2014-01-10	M	Crew	Patella				Acute	L	bursitis	Lower Extremity	2013-2014
905	2014-01-10	M	Crew	Calf				Acute	R	Spasm	Lower Extremity	2013-2014
547	2014-01-14	F	Crew	Wrist	ATR: I spoke with Caitlyn and her wrist is still bugging her but she does not have time to make it in for treatment. I gave her directions on self treatment and encouraged her to wear a wrist support brace that I gave to her a few weeks ago. Weight Room: Full Participation Sport: Full Participation				L	Tendinosis	Upper Extremity	2013-2014
457	2014-01-14	F	Crew	Forearm	ATR: Continue to work on flexibility and increase back strength. Weight Room: Full Participation Sport: Full Participation				R	Pain	Upper Extremity	2013-2014
908	2014-01-15	F	Crew	Wrist	ATR:Have not seen her in a few weeks. Weight Room: As tolerated Sport: May need to be taped.				R	Sprain	Upper Extremity	2013-2014
909	2014-01-15	F	Crew	Shins	ATR: Working on hip and VMO strengthening. Haven't seen her in a couple of weeks. Weights: Watch squat form. Sport: No limitations				B	stress reaction	Lower Extremity	2013-2014
918	2014-01-16	M	Crew	Back				Acute	L	Muscular Imbalance	Trunk	2013-2014
920	2014-01-17	F	Crew	Back	Radhika has not been in at all this week. She should not be self limiting.				B	Spasm	Trunk	2013-2014
849	2014-01-21	M	Crew	Knee					L	ITB Syndrome	Lower Extremity	2013-2014
833	2014-01-22	F	Crew	Lower Back	Hasn't been in the ATR for two month now.				B	Spasm	Trunk	2013-2014
16	2014-01-23	F	Crew	Lower Back	ATR: Working on posture and mobility. She had a follow up with the doctor. He gave her a few ideas to help achieve pain control. I have also given her an at home flexibility plan. Weight Room: As tolerated Sport: As tolerated				B	"Disc Injury (herniation. degeneration)"	Trunk	2013-2014
909	2014-01-23	F	Crew	Knee	ATR: Working on hip and VMO strengthening. Haven't seen her in a couple of weeks. Weights: Watch squat form. Sport: No limitations				L	Unspecified Injury	Lower Extremity	2013-2014
849	2014-01-23	M	Crew	Arm					R	Impingement	Upper Extremity	2013-2014
564	2014-01-24	M	Crew	Lower Back					L	Pain	Trunk	2013-2014
605	2014-01-27	M	Crew	Foot					R	Pain	Lower Extremity	2013-2014
792	2014-01-27	M	Crew	Humerus	ATR - been coming to ATR for stretching/ modalities; started exercises 10_15_2013 Weights - no exercises that load spine; avoid exercises requiring trunk flexion Sport - as tolerated			Acute	R	Subluxation	Upper Extremity	2013-2014
851	2014-01-27	M	Crew	Thorax					R	Contusion	Spine	2013-2014
776	2014-01-29	M	Crew	Lower Back					R		Trunk	2013-2014
597	2014-02-05	F	Crew	Calf	ATR: Encouraged calf and hamstring stretching. Weight Room: Full Participation Sport: Full Participation				R	Spasm	Lower Extremity	2013-2014
947	2014-02-05	F	Crew	Shoulder	ATR: Work on pain management and strain. Weight Room: Upper Body lifting is ok. Sport: Participate as tolerated				L	Pain	Upper Extremity	2013-2014
848	2014-02-05	M	Crew	Shoulder					L	Tendonitis	Upper Extremity	2013-2014
951	2014-02-10	F	Crew	Scapula	ATR: Hasn't been back since her evaluation Weight Room: Full Participation Sport: Full Participation			Acute	L	Spasm	Upper Extremity	2013-2014
959	2014-02-18	F	Crew	Back	ATR: Come in the ATR to manage muscle imbalance Weight Room: Full Participation Sport: Full Participation				B	Spasm	Trunk	2013-2014
829	2014-02-24	F	Crew	Hip	ATR: Working on flexibility and hip alignment. Following up with Chiro on her own due to MD suggestions. Weight Room: Be cautious when loading into flexion Sport: Full Participation				L	Spasm	Lower Extremity	2013-2014
817	2014-02-25	F	Crew	Shoulder	ATR: She's been coming in when her shoulder becomes too painful or tight. Mainly we have been working with her to get her muscles relaxed and loose. Sport: Row as tolerated				R	Tendinitis	Upper Extremity	2013-2014
973	2014-02-27	F	Crew	Hip	ATR: Working on inflammation control. Weight Room: As Tolerated Sport: Encouraged to wear a brace				B	Spasm	Lower Extremity	2013-2014
975	2014-02-27	F	Crew	Knee	ATR: She needs to come to ATR without Jen and followup with rehab. Weight Room: Be cautious with loaded rotation. Sport: As Tolerated				L	Tendinitis	Lower Extremity	2013-2014
947	2014-03-04	F	Crew	Head	ATR: Work on pain management and strain. Weight Room: Upper Body lifting is ok. Sport: Participate as tolerated				N	Concussion	Head	2013-2014
973	2014-03-08	F	Crew	Wrist	ATR: Working on inflammation control. Weight Room: As Tolerated Sport: Encouraged to wear a brace				L	Sprain	Upper Extremity	2013-2014
905	2014-03-10	M	Crew	Back					R	Pain	Trunk	2013-2014
990	2014-03-12	M	Crew	Lower Back					L	Pain	Trunk	2013-2014
840	2014-03-17	F	Crew	Knee	ATR: She has IT band tightness and is working on VMO strengthening Weight Room: Full Participation Sport: Full Participation				L	Tendinitis	Lower Extremity	2013-2014
296	2014-03-28	M	Crew	Lower Back					L	Strain	Trunk	2013-2014
457	2014-03-31	F	Crew	Back	ATR: Continue to work on flexibility and increase back strength. Weight Room: Full Participation Sport: Full Participation				U		Trunk	2013-2014
399	2014-04-14	M	Crew	Neck					L	Spasm	Head	2013-2014
547	2014-04-15	F	Crew	Back	ATR: I spoke with Caitlyn and her wrist is still bugging her but she does not have time to make it in for treatment. I gave her directions on self treatment and encouraged her to wear a wrist support brace that I gave to her a few weeks ago. Weight Room: Full Participation Sport: Full Participation				N	Pain	Trunk	2013-2014
1017	2014-04-16	F	Crew	Back					L	Subluxation	Trunk	2013-2014
1018	2014-04-16	F	Crew	Arm					R	Contusion	Upper Extremity	2013-2014
457	2014-04-18	F	Crew	Shoulder	ATR: Continue to work on flexibility and increase back strength. Weight Room: Full Participation Sport: Full Participation				L	Pain	Upper Extremity	2013-2014
815	2014-04-18	F	Crew	Shoulder	Not seen since Eval.				R	Pain	Upper Extremity	2013-2014
1020	2014-04-22	M	Crew	Coccyx					N	Pain	Spine	2013-2014
1031	2014-05-13	M	Crew	Back					B	Spasm	Trunk	2013-2014
1031	2014-05-13	M	Crew	Knee					L	Tendonitis	Lower Extremity	2013-2014
792	2014-05-21	M	Crew	Shoulder	ATR - been coming to ATR for stretching/ modalities; started exercises 10_15_2013 Weights - no exercises that load spine; avoid exercises requiring trunk flexion Sport - as tolerated				L	Subluxation	Upper Extremity	2013-2014
1052	2014-08-26	M	Crew	Back				Acute	B	"Strain (Muscle. tendon)"	Trunk	2014-2015
809	2014-09-12	M	Crew	Lower Back				Acute	M	Strain	Trunk	2014-2015
1087	2014-09-28	F	Crew	Carpal	Haven't seen since clearance.				N	Spasm	Upper Extremity	2014-2015
16	2014-09-29	F	Crew	Hip	ATR: Working on posture and mobility. She had a follow up with the doctor. He gave her a few ideas to help achieve pain control. I have also given her an at home flexibility plan. Weight Room: As tolerated Sport: As tolerated				L	ITB Syndrome	Lower Extremity	2014-2015
1052	2014-09-30	M	Crew	Foot					R		Lower Extremity	2014-2015
1093	2014-10-01	F	Crew	Throat	Haven't seen her in a month.				M	Unspecified Injury	Head	2014-2015
1094	2014-10-01	F	Crew	Back	ATR: Work on pain management Strength: As Tolerated Sport: As Tolerated			Chronic	R		Trunk	2014-2015
843	2014-10-01	F	Crew	Shoulder	I have not seen her in a week or two				R	Impingement	Upper Extremity	2014-2015
843	2014-10-01	F	Crew	Hip	I have not seen her in a week or two				R	Pain-NOS	Lower Extremity	2014-2015
951	2014-10-02	F	Crew	Knee	ATR: Hasn't been back since her evaluation Weight Room: Full Participation Sport: Full Participation				L	Pain	Lower Extremity	2014-2015
1096	2014-10-02	F	Crew	Back	ATR: Haven't seen in 2 weeks. Strength: Work on TVA activation and Low Trap activations Sport: As tolerated			Sub-Acute	M	Muscle	Trunk	2014-2015
346	2014-10-02	F	Crew	Back	ATR: Continue to work on mobility. Strength: No Restrictions Sport: No Restrictions			Sub-Acute	L	Strain	Trunk	2014-2015
1111	2014-10-09	M	Crew	Lower Back					N		Trunk	2014-2015
1111	2014-10-09	M	Crew	Shoulder					B		Upper Extremity	2014-2015
1118	2014-10-11	F	Crew	Knee	ATR: Work on reducing pain Weights: No restrictions Sport: As tolerated				R	Pain	Lower Extremity	2014-2015
792	2014-10-11	M	Crew	Ankle	ATR - been coming to ATR for stretching/ modalities; started exercises 10_15_2013 Weights - no exercises that load spine; avoid exercises requiring trunk flexion Sport - as tolerated				B	Inflammation	Lower Extremity	2014-2015
1122	2014-10-13	M	Crew	Lower Back					N		Trunk	2014-2015
1125	2014-10-13	F	Crew	Head	Continue with MD instructions and RTP				N	Concussion	Head	2014-2015
857	2014-10-14	F	Crew	Ankle	ATR: Hasn't been seen yet this quarter Weight Room: Full Participation Sport: Full Participation				B	Blister	Lower Extremity	2014-2015
806	2014-10-14	M	Crew	Hip					L		Lower Extremity	2014-2015
902	2014-10-15	M	Crew	Spine				Acute	N	Unclassified	Spine	2014-2015
1135	2014-10-15	M	Crew	Back					R	Pain	Trunk	2014-2015
1093	2014-10-16	F	Crew	Thorax	Haven't seen her in a month.				L	Muscle	Spine	2014-2015
16	2014-10-16	F	Crew	Wrist	ATR: Working on posture and mobility. She had a follow up with the doctor. He gave her a few ideas to help achieve pain control. I have also given her an at home flexibility plan. Weight Room: As tolerated Sport: As tolerated				L	Sprain	Upper Extremity	2014-2015
1147	2014-10-17	M	Crew	Lower Back					N	Muscle	Trunk	2014-2015
1150	2014-10-17	F	Crew	Knee	ATR: Continue with RTP Weights: No restrictions Sport: No restrictions				B	Pain	Lower Extremity	2014-2015
1151	2014-10-17	M	Crew	Head					N	Concussion	Head	2014-2015
829	2014-10-22	F	Crew	Lumbar spine	ATR: Working on flexibility and hip alignment. Following up with Chiro on her own due to MD suggestions. Weight Room: Be cautious when loading into flexion Sport: Full Participation			Acute	L	Joint	Spine	2014-2015
1031	2014-10-23	M	Crew	Back					L	Pain	Trunk	2014-2015
1168	2014-10-23	F	Crew	Foot					L	Pain	Lower Extremity	2014-2015
817	2014-10-24	F	Crew	Thigh	ATR: She's been coming in when her shoulder becomes too painful or tight. Mainly we have been working with her to get her muscles relaxed and loose. Sport: Row as tolerated			Acute	L	Strain	Trunk	2014-2015
849	2014-10-25	M	Crew	Neck					N	Inflammation (General)	Head	2014-2015
1175	2014-10-27	F	Crew	Foot/Ankle	Hasn't been seen in ATR for a month.				R		Lower Extremity	2014-2015
1151	2014-10-28	M	Crew	General medicine				Acute	N	Unclassified	Miscellaneous	2014-2015
1179	2014-10-28	F	Crew	Back	Not seen since evaluation				W		Trunk	2014-2015
1184	2014-10-29	F	Crew	Thigh	ATR: Work on reducing Tenosynovitis Weight Room: As tolerated Sport: Row as long as pain free				L	Spasm	Trunk	2014-2015
780	2014-10-31	F	Crew	Back	ATR: Work on reducing muscle spasm and correcting posture. Weight Room: As Tolerated Sport: As Tolerated.				B		Trunk	2014-2015
1186	2014-11-01	F	Crew	Lower Back	Haven't seen yet in the new year.				B	Strain	Trunk	2014-2015
1187	2014-11-01	F	Crew	Hand	Haven't seen this quarter				L	Fracture	Upper Extremity	2014-2015
1188	2014-11-01	F	Crew	Knee	QUIT				R		Lower Extremity	2014-2015
457	2014-11-03	F	Crew	Knee	ATR: Continue to work on flexibility and increase back strength. Weight Room: Full Participation Sport: Full Participation				L	Tendon	Lower Extremity	2014-2015
1150	2014-11-04	F	Crew	Forearm	ATR: Continue with RTP Weights: No restrictions Sport: No restrictions				L		Upper Extremity	2014-2015
1194	2014-11-06	F	Crew	Head	Continue with RTP				N	Concussion	Head	2014-2015
1195	2014-11-06	F	Crew	Ankle / foot	ATR: Continue next 14 days filling out PCSS Strength: Full Sport: Full				L	Sprain	Lower Extremity	2014-2015
1199	2014-11-10	F	Crew	Scapula					R	Spasm	Upper Extremity	2014-2015
1202	2014-11-13	M	Crew	Wrist					R	Sprain	Upper Extremity	2014-2015
831	2014-11-13	M	Crew	Hand					R		Upper Extremity	2014-2015
1203	2014-11-14	M	Crew	Hip				Acute	L	Contusion (Hematoma)	Lower Extremity	2014-2015
959	2014-11-18	F	Crew	Hip	ATR: Come in the ATR to manage muscle imbalance Weight Room: Full Participation Sport: Full Participation				R		Lower Extremity	2014-2015
849	2014-11-18	M	Crew	Hip					R	Muscular Imbalance	Lower Extremity	2014-2015
1209	2014-11-19	F	Crew	Hip	Continue with Rehab for Thoracic Spine.				R	Muscular Imbalance	Lower Extremity	2014-2015
1214	2014-11-21	F	Crew	Lower Back	ATR: Haven't seen in a few weeks. Weights: Full Sport: Full			Acute	R	Spasm	Trunk	2014-2015
1222	2014-12-03	F	Crew	Calf	Haven't seen yet this quarter				L	Strain	Lower Extremity	2014-2015
806	2014-12-04	M	Crew	Sacrum					N		Spine	2014-2015
1150	2014-12-10	F	Crew	Head	ATR: Continue with RTP Weights: No restrictions Sport: No restrictions				B	Concussion	Head	2014-2015
1195	2014-12-11	F	Crew	Lower Back	ATR: Continue next 14 days filling out PCSS Strength: Full Sport: Full				R		Trunk	2014-2015
16	2014-12-12	F	Crew	Thoracic spine	ATR: Working on posture and mobility. She had a follow up with the doctor. He gave her a few ideas to help achieve pain control. I have also given her an at home flexibility plan. Weight Room: As tolerated Sport: As tolerated				N		Spine	2014-2015
1228	2014-12-12	M	Crew	Back				Chronic	N	Spasm	Trunk	2014-2015
1151	2014-12-12	M	Crew	Lumbar spine					B	Sprain/Strain	Spine	2014-2015
1231	2014-12-16	M	Crew	Head					N	Concussion	Head	2014-2015
947	2015-01-05	F	Crew	Achilles tendon	ATR: Work on pain management and strain. Weight Room: Upper Body lifting is ok. Sport: Participate as tolerated				R	Tendinitis	Lower Extremity	2014-2015
1236	2015-01-05	F	Crew	Foot	"ATR: Improving. continue with rehab 2-3x's a week. Strength: As tolerated Sport: As tolerated"				R	Plantar Fascitis	Lower Extremity	2014-2015
1239	2015-01-08	M	Crew	Back	ATR- being seen for hip flexor treatment and rehab Weight room- avoid heavy lower body loading Participation- can participate as tolerated; performing 75% on erg then move to watt bike when pain returns				N	Spasm	Trunk	2014-2015
1240	2015-01-08	F	Crew	Back	ATR: Haven't seen in ATR for a month. Strength: No restrictions Sport: No restrictions			Chronic	U	Muscular Imbalance	Trunk	2014-2015
1151	2015-01-08	M	Crew	Ankle				Acute	L	bursitis	Lower Extremity	2014-2015
1199	2015-01-13	F	Crew	Head					N	Concussion	Head	2014-2015
1093	2015-01-17	F	Crew	Back	Haven't seen her in a month.				L	Spasm	Trunk	2014-2015
831	2015-01-17	M	Crew	Back					N	Spasm	Trunk	2014-2015
1231	2015-01-21	M	Crew	Hip				Sub-Acute	L	ITB Syndrome	Lower Extremity	2014-2015
857	2015-01-23	F	Crew	Finger	ATR: Hasn't been seen yet this quarter Weight Room: Full Participation Sport: Full Participation				R	Strain	Upper Extremity	2014-2015
776	2015-01-28	M	Crew	SI joint					R		Spine	2014-2015
1268	2015-02-02	F	Crew	Lower Back					R	Pain	Trunk	2014-2015
1184	2015-02-10	F	Crew	Foot	ATR: Work on reducing Tenosynovitis Weight Room: As tolerated Sport: Row as long as pain free				L	Bone	Lower Extremity	2014-2015
1150	2015-02-12	F	Crew	Rib	ATR: Continue with RTP Weights: No restrictions Sport: No restrictions				L	Subluxation	Trunk	2014-2015
1290	2015-02-13	F	Crew	Back					R	Spasm	Trunk	2014-2015
1111	2015-02-19	M	Crew	Finger					R	Tenosynovitis	Upper Extremity	2014-2015
1301	2015-02-21	M	Crew	Lumbar spine				Sub-Acute	B	Strain	Spine	2014-2015
1304	2015-02-24	F	Crew	Metatarsal				Sub-Acute	L	Fracture	Lower Extremity	2014-2015
1168	2015-02-24	F	Crew	Thigh				Acute	B	Strain	Trunk	2014-2015
1096	2015-02-26	F	Crew	Lower Back	ATR: Haven't seen in 2 weeks. Strength: Work on TVA activation and Low Trap activations Sport: As tolerated			Acute	L	Unclassified	Trunk	2014-2015
421	2015-02-27	F	Crew	Head	Continue with 14 day PCSS				N	Concussion	Head	2014-2015
1195	2015-02-28	F	Crew	Lower Limb	ATR: Continue next 14 days filling out PCSS Strength: Full Sport: Full			Acute	R	Sprain	Lower Extremity	2014-2015
780	2015-03-03	F	Crew	Shoulder	ATR: Work on reducing muscle spasm and correcting posture. Weight Room: As Tolerated Sport: As Tolerated.				R	Pain	Upper Extremity	2014-2015
947	2015-03-12	F	Crew	Foot/Ankle	ATR: Work on pain management and strain. Weight Room: Upper Body lifting is ok. Sport: Participate as tolerated				L	Sprain/Strain	Lower Extremity	2014-2015
454	2015-03-20	F	Crew	Lumbar spine	ATR: Continue with rehab 2-3x's per week. Weights: As Tolerated Sport: As Tolerated				L	Sprain/Strain	Spine	2014-2015
815	2015-04-01	F	Crew	Shoulder	Not seen since Eval.				L	Spasm	Upper Extremity	2014-2015
1209	2015-04-01	F	Crew	Spine	Continue with Rehab for Thoracic Spine.				B	Unclassified	Spine	2014-2015
1020	2015-04-02	M	Crew	Shoulder				Acute	L	Impingement	Upper Extremity	2014-2015
1195	2015-04-02	F	Crew	Head	ATR: Continue next 14 days filling out PCSS Strength: Full Sport: Full				N		Head	2014-2015
1338	2015-04-07	M	Crew	Rib					L	Subluxation	Trunk	2014-2015
16	2015-04-09	F	Crew	Throat	ATR: Working on posture and mobility. She had a follow up with the doctor. He gave her a few ideas to help achieve pain control. I have also given her an at home flexibility plan. Weight Room: As tolerated Sport: As tolerated				N		Head	2014-2015
1195	2015-04-24	F	Crew	Wrist	ATR: Continue next 14 days filling out PCSS Strength: Full Sport: Full				R		Upper Extremity	2014-2015
1354	2015-05-01	F	Crew	Lower Leg				Acute	R	Strain	Lower Extremity	2014-2015
1356	2015-05-05	M	Crew	Knee				Acute	R	Pain	Lower Extremity	2014-2015
1359	2015-05-12	M	Crew	Back					L	Strain	Trunk	2014-2015
1354	2015-05-26	F	Crew	Head					N	Concussion	Head	2014-2015
1222	2015-08-18	F	Crew	Back	Haven't seen yet this quarter			Acute	M	Pain	Trunk	2015-2016
1151	2015-09-18	M	Crew	Chest				Chronic	N	Pain	Trunk	2015-2016
1411	2015-09-23	M	Crew	Knee				Acute	R	"Disorders of synovium. tendon and bursa"	Lower Extremity	2015-2016
1412	2015-09-23	F	Crew	Knee				Chronic	B	Tendinitis	Lower Extremity	2015-2016
1417	2015-09-24	F	Crew	Knee					R	Sprain	Lower Extremity	2015-2016
1419	2015-09-25	F	Crew	Hip				Chronic	R	Strain	Lower Extremity	2015-2016
1354	2015-09-30	F	Crew	Knee				Acute	N	Meniscal	Lower Extremity	2015-2016
1437	2015-10-02	M	Crew	Back					W	"Disc Injury (herniation. degeneration)"	Trunk	2015-2016
1147	2015-10-02	M	Crew	Lower Back				Chronic	R	Sprain	Trunk	2015-2016
1440	2015-10-03	F	Crew	Spine					W	Unclassified	Spine	2015-2016
1445	2015-10-07	F	Crew	Knee				Acute	L	Tendonitis	Lower Extremity	2015-2016
1447	2015-10-08	F	Crew	Hip					L	Tendinitis	Lower Extremity	2015-2016
1451	2015-10-09	F	Crew	Back					N	Joint	Trunk	2015-2016
1452	2015-10-09	F	Crew	Knee				Chronic	R	Chrondromalacia	Lower Extremity	2015-2016
1458	2015-10-09	M	Crew	Wrist	ATR - work on both hand and ITB Weights - No gripping activities. Keep LE activities to pain less than or equal to 2/10 on knee. Sport - No erging / rowing. Keep LE activities to pain level 2/10 or less on knee.			Acute	L	Sprain/Strain	Upper Extremity	2015-2016
1467	2015-10-12	M	Crew	Lower Back					B	Pain	Trunk	2015-2016
1470	2015-10-12	M	Crew	Ankle					L	Sprain/Strain	Lower Extremity	2015-2016
1473	2015-10-14	M	Crew	Hip				Chronic	R	Tendinitis	Lower Extremity	2015-2016
1202	2015-10-14	M	Crew	Back					N	Strain	Trunk	2015-2016
1304	2015-10-15	F	Crew	Larynx					N	Inflammation (General)	Head	2015-2016
1111	2015-10-15	M	Crew	Back				Acute	L	Strain	Trunk	2015-2016
1231	2015-10-18	M	Crew	SI joint				Sub-Acute	R	Sprain	Spine	2015-2016
1356	2015-10-19	M	Crew	Head					N	Concussion	Head	2015-2016
1495	2015-10-20	M	Crew	Shoulder				Chronic	R	"Cartilage Injury (Articular. labrum. meniscus. rib)"	Upper Extremity	2015-2016
1354	2015-10-20	F	Crew	Knee					L	Chrondromalacia	Lower Extremity	2015-2016
947	2015-10-21	F	Crew	Neck/Cervical Spine	ATR: Work on pain management and strain. Weight Room: Upper Body lifting is ok. Sport: Participate as tolerated				R		Spine	2015-2016
1214	2015-10-21	F	Crew	Patella	ATR: Haven't seen in a few weeks. Weights: Full Sport: Full				L	Tendonitis	Lower Extremity	2015-2016
1504	2015-10-23	F	Crew	Knee					R	Tendinitis	Lower Extremity	2015-2016
1505	2015-10-23	M	Crew	Back					L	Spasm	Trunk	2015-2016
1096	2015-10-24	F	Crew	Back	ATR: Haven't seen in 2 weeks. Strength: Work on TVA activation and Low Trap activations Sport: As tolerated				B	Pain	Trunk	2015-2016
1509	2015-10-25	M	Crew	Buttock				Acute	L	Strain	Trunk	2015-2016
1512	2015-10-26	F	Crew	Ankle					R		Lower Extremity	2015-2016
1514	2015-10-28	M	Crew	Back					N	Strain	Trunk	2015-2016
1522	2015-10-30	F	Crew	Fingers					B	Tendonitis	Upper Extremity	2015-2016
1530	2015-11-01	M	Crew	Head					N	Concussion	Head	2015-2016
1534	2015-11-04	M	Crew	Lumbar spine				Chronic	B	Sprain	Spine	2015-2016
1356	2015-11-04	M	Crew	Hip				Acute	L	Strain	Lower Extremity	2015-2016
1354	2015-11-06	F	Crew	Thigh					L	Tendinitis	Trunk	2015-2016
776	2015-11-10	M	Crew	Hip				Acute	R	Strain	Lower Extremity	2015-2016
1093	2015-11-10	F	Crew	Ankle / foot	Haven't seen her in a month.			Acute	L	Pain	Lower Extremity	2015-2016
1514	2015-11-10	M	Crew	Hamstring					L	"Disorders of synovium. tendon and bursa"	Lower Extremity	2015-2016
1546	2015-11-12	F	Crew	Knee					R	Muscle	Lower Extremity	2015-2016
1549	2015-11-13	F	Crew	Ankle				Chronic	R	Subluxation / Dislocation	Lower Extremity	2015-2016
1549	2015-11-13	F	Crew	Wrist				Chronic	R	Inflammation	Upper Extremity	2015-2016
1551	2015-11-14	M	Crew	Lower Back				Chronic	R	Strain	Trunk	2015-2016
1452	2015-11-17	F	Crew	Back					L	Tendonitis	Trunk	2015-2016
1467	2015-11-17	M	Crew	Chest					L	Contusion	Trunk	2015-2016
1559	2015-11-17	F	Crew	SI joint					R	Joint	Spine	2015-2016
1514	2015-11-18	M	Crew	Lower Leg				Acute	R	Skin Infection	Lower Extremity	2015-2016
1093	2015-11-19	F	Crew	Chest	Haven't seen her in a month.				N	Pain	Trunk	2015-2016
1563	2015-11-19	F	Crew	Lower Limb					N	Pain	Lower Extremity	2015-2016
1564	2015-11-20	F	Crew	Hip					R	Strain	Lower Extremity	2015-2016
1572	2015-12-02	F	Crew	Leg				Chronic	B	Muscular Imbalance	Lower Extremity	2015-2016
1239	2016-01-06	M	Crew	Hip	ATR- being seen for hip flexor treatment and rehab Weight room- avoid heavy lower body loading Participation- can participate as tolerated; performing 75% on erg then move to watt bike when pain returns				R	Pain	Lower Extremity	2015-2016
1584	2016-01-06	F	Crew	Knee					L	Patella Femoral Pain Syndrome	Lower Extremity	2015-2016
1587	2016-01-08	F	Crew	Thoracic spine					R	Subluxation	Spine	2015-2016
1458	2016-01-13	M	Crew	Leg	ATR - work on both hand and ITB Weights - No gripping activities. Keep LE activities to pain less than or equal to 2/10 on knee. Sport - No erging / rowing. Keep LE activities to pain level 2/10 or less on knee.				L	ITB Syndrome	Lower Extremity	2015-2016
1111	2016-01-14	M	Crew	Knee					L	Pain	Lower Extremity	2015-2016
1437	2016-01-16	M	Crew	Piriformis				Acute	L	Spasm	Trunk	2015-2016
1437	2016-01-20	M	Crew	Finger					R	Laceration	Upper Extremity	2015-2016
1609	2016-01-21	F	Crew	Hip				Acute	R	"Strain (Muscle. tendon)"	Lower Extremity	2015-2016
1622	2016-01-27	F	Crew	Back					R		Trunk	2015-2016
1624	2016-01-27	F	Crew	Knee					L	Patella Femoral Pain Syndrome	Lower Extremity	2015-2016
175	2016-01-28	M	Crew	Ankle				Acute	L	Tendonitis	Lower Extremity	2015-2016
1631	2016-01-30	F	Crew	Calf					L	Strain	Lower Extremity	2015-2016
1636	2016-02-02	M	Crew	Finger				Sub-Acute	R	Contusion / strain / sprain / fracture	Upper Extremity	2015-2016
776	2016-02-03	M	Crew	Back					B	Unclassified	Trunk	2015-2016
1648	2016-02-04	F	Crew	Shoulder					L	Muscular Imbalance	Upper Extremity	2015-2016
1356	2016-02-09	M	Crew	Finger					R		Upper Extremity	2015-2016
1651	2016-02-10	F	Crew	Back					R	Sprain	Trunk	2015-2016
1549	2016-02-11	F	Crew	Thoracic spine					R	Spasm	Spine	2015-2016
857	2016-02-16	F	Crew	Back	ATR: Hasn't been seen yet this quarter Weight Room: Full Participation Sport: Full Participation				R	Spasm	Trunk	2015-2016
1147	2016-02-16	M	Crew	Back				Chronic	W	Strain	Trunk	2015-2016
1505	2016-02-22	M	Crew	Ankle					R		Lower Extremity	2015-2016
1563	2016-02-22	F	Crew	Head				Acute	N	Concussion	Head	2015-2016
1440	2016-02-23	F	Crew	Ankle					R	Strain	Lower Extremity	2015-2016
1663	2016-02-23	F	Crew	Talus					L	Sprain/Strain	Lower Extremity	2015-2016
1458	2016-02-24	M	Crew	Finger	ATR - work on both hand and ITB Weights - No gripping activities. Keep LE activities to pain less than or equal to 2/10 on knee. Sport - No erging / rowing. Keep LE activities to pain level 2/10 or less on knee.				R		Upper Extremity	2015-2016
1093	2016-02-24	F	Crew	Patella	Haven't seen her in a month.			Acute	R	Tendinitis	Lower Extremity	2015-2016
1184	2016-02-25	F	Crew	Hip	ATR: Work on reducing Tenosynovitis Weight Room: As tolerated Sport: Row as long as pain free				B	Spasm	Lower Extremity	2015-2016
1665	2016-02-26	M	Crew	Lower Leg				Acute	R	Abrasion	Lower Extremity	2015-2016
1666	2016-02-29	M	Crew	Shoulder					L	Impingement	Upper Extremity	2015-2016
1670	2016-03-02	F	Crew	Rib				Chronic	R	Subluxation	Trunk	2015-2016
1534	2016-03-05	M	Crew	Ankle / foot				Acute	R	Impingement	Lower Extremity	2015-2016
1666	2016-03-08	M	Crew	Hamstring					B	Pain	Lower Extremity	2015-2016
851	2016-03-15	M	Crew	Rib					R	Subluxation	Trunk	2015-2016
1679	2016-03-16	F	Crew	Toe					R	Fracture	Lower Extremity	2015-2016
1636	2016-03-21	M	Crew	Elbow				Sub-Acute	L	Muscle	Upper Extremity	2015-2016
1417	2016-03-21	F	Crew	Back				Acute	R	Pain	Trunk	2015-2016
1680	2016-03-22	M	Crew	Forearm					L	Tendonitis	Upper Extremity	2015-2016
1359	2016-03-25	M	Crew	Leg					L	Nerve	Lower Extremity	2015-2016
1681	2016-03-25	M	Crew	Back					W	Strain	Trunk	2015-2016
1682	2016-03-25	F	Crew	Knee					N	Loose body	Lower Extremity	2015-2016
1504	2016-04-04	F	Crew	Shoulder					L	Pain	Upper Extremity	2015-2016
1093	2016-04-06	F	Crew	Back	Haven't seen her in a month.				B	Strain	Trunk	2015-2016
1692	2016-04-09	M	Crew	Hip					R		Lower Extremity	2015-2016
951	2016-04-11	F	Crew	Rib	ATR: Hasn't been back since her evaluation Weight Room: Full Participation Sport: Full Participation				L	Pain	Trunk	2015-2016
1451	2016-04-15	F	Crew	Shoulder					L	Spasm/Cramp	Upper Extremity	2015-2016
1572	2016-04-15	F	Crew	Hamstring					L	Strain	Lower Extremity	2015-2016
1697	2016-04-15	F	Crew	Knee					R		Lower Extremity	2015-2016
1670	2016-04-18	F	Crew	Muscle					R	Strain	Miscellaneous	2015-2016
1338	2016-04-23	M	Crew	Back					N	Pain	Trunk	2015-2016
947	2016-04-26	F	Crew	Back	ATR: Work on pain management and strain. Weight Room: Upper Body lifting is ok. Sport: Participate as tolerated			Chronic	B	Pain	Trunk	2015-2016
851	2016-04-27	M	Crew	Hip					L	Spasm	Lower Extremity	2015-2016
1534	2016-04-27	M	Crew	Back					W	Pain	Trunk	2015-2016
605	2016-04-28	M	Crew	Pelvis					B		Trunk	2015-2016
1187	2016-05-03	F	Crew	Head	Haven't seen this quarter				N	Concussion	Head	2015-2016
851	2016-05-19	M	Crew	Unspecified					N	Unclassified	Miscellaneous	2015-2016
1222	2016-07-27	F	Crew	Shoulder	Haven't seen yet this quarter			Chronic	L	Muscle	Upper Extremity	2015-2016
1546	2016-08-15	F	Crew	Arm					L	Nerve	Upper Extremity	2016-2017
1733	2016-08-25	M	Crew	Lumbar spine					L	Inflammatory	Spine	2016-2017
1437	2016-09-09	M	Crew	Knee					N	Inflammation	Lower Extremity	2016-2017
1755	2016-09-20	F	Crew	Shoulder				Sub-Acute	R	Strain	Upper Extremity	2016-2017
1758	2016-09-21	M	Crew	Back					N	Joint	Trunk	2016-2017
1764	2016-09-24	F	Crew	Lower Back					N	Pain	Trunk	2016-2017
1522	2016-09-24	F	Crew	Knee					L	Tendonitis	Lower Extremity	2016-2017
1758	2016-09-27	M	Crew	Back					R	Strain	Trunk	2016-2017
1631	2016-09-27	F	Crew	Shoulder					L	Muscle	Upper Extremity	2016-2017
1775	2016-09-29	F	Crew	Shoulder					B	Instability	Upper Extremity	2016-2017
1651	2016-09-30	F	Crew	Head					N	Concussion	Head	2016-2017
1782	2016-10-03	M	Crew	Hip					L	Impingement	Lower Extremity	2016-2017
1151	2016-10-05	M	Crew	Shoulder					L	Tendinosis	Upper Extremity	2016-2017
1795	2016-10-06	M	Crew	Knee					L	"Strain (Muscle. tendon)"	Lower Extremity	2016-2017
1796	2016-10-06	M	Crew	Foot					L	Pain	Lower Extremity	2016-2017
1798	2016-10-07	M	Crew	Back					N	Strain	Trunk	2016-2017
1800	2016-10-07	M	Crew	Ankle					L	Sprain	Lower Extremity	2016-2017
1801	2016-10-08	M	Crew	Patella					N	Tendonitis	Lower Extremity	2016-2017
1805	2016-10-10	M	Crew	Neck					N	Unspecified Injury	Head	2016-2017
1806	2016-10-10	F	Crew	Various					N		Miscellaneous	2016-2017
1808	2016-10-11	M	Crew	Head					N	Concussion	Head	2016-2017
1809	2016-10-12	F	Crew	Patella					B	Tendinitis	Lower Extremity	2016-2017
1808	2016-10-13	M	Crew	Ankle					R		Lower Extremity	2016-2017
1814	2016-10-14	M	Crew	Back					L	"Strain (Muscle. tendon)"	Trunk	2016-2017
1775	2016-10-18	F	Crew	Foot / Ankle					L	Plantar Fascitis	Lower Extremity	2016-2017
1821	2016-10-21	F	Crew	Lung					B		Miscellaneous	2016-2017
1831	2016-10-26	M	Crew	Chest					N	Unspecified Injury	Trunk	2016-2017
1796	2016-10-26	M	Crew	Thigh					L	Pain	Trunk	2016-2017
1836	2016-10-27	F	Crew	Ankle					R	Fracture	Lower Extremity	2016-2017
1504	2016-10-28	F	Crew	Back					B	Pain	Trunk	2016-2017
1231	2016-10-28	M	Crew	Various and Multiple					N		Miscellaneous	2016-2017
1839	2016-10-29	F	Crew	Back					W	Pain	Trunk	2016-2017
1680	2016-11-02	M	Crew	Thigh					L	Tendinosis	Trunk	2016-2017
1861	2016-11-08	M	Crew	Lower Back					N	Pain	Trunk	2016-2017
1864	2016-11-08	F	Crew	Lower Leg					R	Strain	Lower Extremity	2016-2017
1861	2016-11-15	M	Crew	Shoulder					N	Subluxation / Dislocation	Upper Extremity	2016-2017
1636	2016-11-22	M	Crew	Back					R	Strain	Trunk	2016-2017
1231	2016-11-28	M	Crew	Nervous/Musculoskeletal					L	Impingement	Miscellaneous	2016-2017
1888	2016-12-01	M	Crew	Shoulder					L	Pain	Upper Extremity	2016-2017
1889	2016-12-01	M	Crew	Tibia					R	Inflammation	Lower Extremity	2016-2017
1831	2017-01-06	M	Crew	Back					L		Trunk	2016-2017
1910	2017-01-09	F	Crew	Head					N	Concussion	Head	2016-2017
1354	2017-01-09	F	Crew	Ankle / foot					B	bursitis	Lower Extremity	2016-2017
815	2017-01-10	F	Crew	Calcaneus	Not seen since Eval.				R	Plantar Fascitis	Lower Extremity	2016-2017
1914	2017-01-10	M	Crew	Forearm				Acute	R	Strain	Upper Extremity	2016-2017
1918	2017-01-13	F	Crew	Hip					R	Strain	Lower Extremity	2016-2017
1805	2017-01-14	M	Crew	Knee					L	Sprain/Strain	Lower Extremity	2016-2017
1795	2017-01-16	M	Crew	Knee					R	Patella Femoral Pain Syndrome	Lower Extremity	2016-2017
806	2017-01-19	M	Crew	Forearm					R		Upper Extremity	2016-2017
1437	2017-01-20	M	Crew	Toe					R		Lower Extremity	2016-2017
1679	2017-01-20	F	Crew	Lower Back					B	Muscular Imbalance	Trunk	2016-2017
1452	2017-01-21	F	Crew	Back					U	Nerve	Trunk	2016-2017
1417	2017-01-22	F	Crew	Lower Back					B	Unspecified Injury	Trunk	2016-2017
1936	2017-01-22	M	Crew	Hip					R	ITB Syndrome	Lower Extremity	2016-2017
1937	2017-01-24	F	Crew	Lower Back					B	Muscular Imbalance	Trunk	2016-2017
1918	2017-01-24	F	Crew	Patella					B	Patellofemoral Disorder	Lower Extremity	2016-2017
1670	2017-01-25	F	Crew	Knee					L	Pain	Lower Extremity	2016-2017
1942	2017-01-25	M	Crew	Hand					B	Muscular Imbalance	Upper Extremity	2016-2017
1864	2017-01-25	F	Crew	Foot					L	Sprain/Strain	Lower Extremity	2016-2017
1800	2017-02-02	M	Crew	Back					U	Pain	Trunk	2016-2017
1956	2017-02-03	F	Crew	Wrist					R	"Strain (Muscle. tendon)"	Upper Extremity	2016-2017
1809	2017-02-06	F	Crew	Lower Back					B	Spasm	Trunk	2016-2017
1964	2017-02-09	M	Crew	Hand					L	Inflammation	Upper Extremity	2016-2017
1967	2017-02-10	M	Crew	Elbow					R	Rupture	Upper Extremity	2016-2017
1356	2017-02-16	M	Crew	Shoulder					L	Contusion	Upper Extremity	2016-2017
1440	2017-02-18	F	Crew	Shoulder					B	Nerve	Upper Extremity	2016-2017
1670	2017-02-22	F	Crew	Ankle					R	"Strain (Muscle. tendon)"	Lower Extremity	2016-2017
1775	2017-03-01	F	Crew	Shoulder					R	Impingement	Upper Extremity	2016-2017
1437	2017-03-07	M	Crew	Knee					L	Tendon	Lower Extremity	2016-2017
1697	2017-03-08	F	Crew	Lower Back					L	Muscle	Trunk	2016-2017
1996	2017-03-13	F	Crew	Back					R	Spasm	Trunk	2016-2017
1997	2017-03-13	M	Crew	Abdomen					R	Strain	Trunk	2016-2017
2003	2017-03-21	F	Crew	Knee					R	Patella Femoral Pain Syndrome	Lower Extremity	2016-2017
1622	2017-03-23	F	Crew	Shoulder					R	Pain	Upper Extremity	2016-2017
2004	2017-03-24	F	Crew	Lower Back					B	Pain	Trunk	2016-2017
1942	2017-03-24	M	Crew	Knee					L	Patella Femoral Pain Syndrome	Lower Extremity	2016-2017
1910	2017-04-01	F	Crew	Hand					L		Upper Extremity	2016-2017
1889	2017-04-04	M	Crew	Shoulder					L	Instability	Upper Extremity	2016-2017
1836	2017-04-06	F	Crew	Back					M		Trunk	2016-2017
1651	2017-04-10	F	Crew	Hip					L		Lower Extremity	2016-2017
2019	2017-04-11	F	Crew	Back					N	Spasm	Trunk	2016-2017
1956	2017-04-11	F	Crew	Ankle					L	Sprain	Lower Extremity	2016-2017
2020	2017-04-11	F	Crew	Hip					L		Lower Extremity	2016-2017
1679	2017-04-12	F	Crew	Biceps					R	Tendinitis	Upper Extremity	2016-2017
1775	2017-04-18	F	Crew	Head					N	Concussion	Head	2016-2017
1936	2017-04-19	M	Crew	Back					R	Strain	Trunk	2016-2017
1805	2017-05-02	M	Crew	Hamstring					R	Strain	Lower Extremity	2016-2017
2043	2017-05-05	F	Crew	Ankle					N	Sprain	Lower Extremity	2016-2017
2046	2017-05-09	M	Crew	Wrist					R	Sprain	Upper Extremity	2016-2017
1796	2017-05-22	M	Crew	Lower Back					R	Strain	Trunk	2016-2017
1356	2017-05-22	M	Crew	Abdomen					N	Strain	Trunk	2016-2017
2054	2017-05-24	M	Crew	Elbow					L	Abrasion	Upper Extremity	2016-2017
1782	2017-05-31	M	Crew	Lower Back					L	Strain	Trunk	2016-2017
2054	2017-09-22	M	Crew	Back					N	Spasm	Trunk	2017-2018
1997	2017-09-25	M	Crew	Head					N	Concussion	Head	2017-2018
1801	2017-09-26	M	Crew	Back					B		Trunk	2017-2018
1338	2017-09-27	M	Crew	Elbow					R	Pain	Upper Extremity	2017-2018
1546	2017-09-29	F	Crew	Bicep					N	Inflammation	Upper Extremity	2017-2018
1839	2017-09-29	F	Crew	Back					N		Trunk	2017-2018
1679	2017-10-03	F	Crew	Thoracic spine					B		Spine	2017-2018
1417	2017-10-03	F	Crew	Lower Back					N		Trunk	2017-2018
2115	2017-10-03	M	Crew	Lower Back				Sub-Acute	N	Instability	Trunk	2017-2018
2118	2017-10-04	M	Crew	Back					L	Muscular Imbalance	Trunk	2017-2018
1800	2017-10-06	M	Crew	Arm					B	Spasm/Cramp	Upper Extremity	2017-2018
2125	2017-10-07	F	Crew	Lower Back					B	Muscle	Trunk	2017-2018
1452	2017-10-07	F	Crew	Lower Back					N	Pain	Trunk	2017-2018
1682	2017-10-11	F	Crew	Knee				Chronic	R	Pain	Lower Extremity	2017-2018
2146	2017-10-12	M	Crew	Lower Back					B	Inflammation	Trunk	2017-2018
2149	2017-10-13	M	Crew	Abdomen					N		Trunk	2017-2018
2115	2017-10-15	M	Crew	Wrist					R		Upper Extremity	2017-2018
2019	2017-10-16	F	Crew	Back					M	Pain	Trunk	2017-2018
2159	2017-10-17	F	Crew	Finger					N	Pain	Upper Extremity	2017-2018
1996	2017-10-19	F	Crew	Back					B		Trunk	2017-2018
1184	2017-10-20	F	Crew	Wrist	ATR: Work on reducing Tenosynovitis Weight Room: As tolerated Sport: Row as long as pain free				R	Strain	Upper Extremity	2017-2018
2172	2017-10-20	F	Crew	Foot				Acute	R	Pain	Lower Extremity	2017-2018
2146	2017-10-21	M	Crew	Ankle					L	Sprain	Lower Extremity	2017-2018
2173	2017-10-21	F	Crew	Back					L	Spasm	Trunk	2017-2018
1733	2017-10-23	M	Crew	Back					L	Pain	Trunk	2017-2018
2178	2017-10-24	M	Crew	Lower Back					L	Pain	Trunk	2017-2018
1839	2017-10-24	F	Crew	Foot				Acute	L	Pain	Lower Extremity	2017-2018
1184	2017-10-25	F	Crew	Back	ATR: Work on reducing Tenosynovitis Weight Room: As tolerated Sport: Row as long as pain free				B		Trunk	2017-2018
2188	2017-10-28	F	Crew	Back					W	Spasm	Trunk	2017-2018
2159	2017-10-30	F	Crew	Unspecified				Acute	N	Unclassified	Miscellaneous	2017-2018
1151	2017-11-01	M	Crew	Hip					R	Muscular Imbalance	Lower Extremity	2017-2018
1831	2017-11-01	M	Crew	Shoulder				Acute	R	Tendonitis	Upper Extremity	2017-2018
2046	2017-11-03	M	Crew	Back					B		Trunk	2017-2018
1514	2017-11-14	M	Crew	Back					M	Muscular Imbalance	Trunk	2017-2018
1437	2017-11-16	M	Crew	Sacrum				Acute	R	Inflammation	Spine	2017-2018
1861	2017-11-16	M	Crew	Back					R	Strain	Trunk	2017-2018
2245	2017-11-21	F	Crew	Wrist					R	Tendinitis	Upper Extremity	2017-2018
1417	2017-11-30	F	Crew	Shoulder					R	Impingement	Upper Extremity	2017-2018
2149	2017-12-02	M	Crew	Hip					R	Muscular Imbalance	Lower Extremity	2017-2018
1504	2017-12-11	F	Crew	Arm					N	Contusion	Upper Extremity	2017-2018
2269	2017-12-14	F	Crew	Back					B		Trunk	2017-2018
1631	2017-12-15	F	Crew	Scapula					B	Muscular Imbalance	Upper Extremity	2017-2018
2274	2018-01-07	M	Crew	Elbow					L	Nerve	Upper Extremity	2017-2018
1437	2018-01-10	M	Crew	Thoracic spine					L	Pain	Spine	2017-2018
1839	2018-01-11	F	Crew	Wrist					B		Upper Extremity	2017-2018
1546	2018-01-15	F	Crew	Back					B	Inflammation	Trunk	2017-2018
2284	2018-01-16	M	Crew	Back					R	Pain	Trunk	2017-2018
2046	2018-01-17	M	Crew	Chest					N	Pain	Trunk	2017-2018
2290	2018-01-19	F	Crew	Foot					L	Pain	Lower Extremity	2017-2018
2149	2018-01-19	M	Crew	Thorax					L	Strain	Spine	2017-2018
1546	2018-01-20	F	Crew	Forearm					R	Tenosynovitis	Upper Extremity	2017-2018
2300	2018-01-23	F	Crew	Back					M	Pain	Trunk	2017-2018
1651	2018-01-23	F	Crew	Back					M	Muscular Imbalance	Trunk	2017-2018
2301	2018-01-23	M	Crew	Thoracic spine					N	Unspecified Injury	Spine	2017-2018
1936	2018-01-24	M	Crew	Thorax					R		Spine	2017-2018
1504	2018-01-25	F	Crew	Neck/Cervical Spine				Sub-Acute	N		Spine	2017-2018
2308	2018-01-27	F	Crew	Foot					L	Pain	Lower Extremity	2017-2018
2310	2018-01-27	M	Crew	Knee					L	Pain	Lower Extremity	2017-2018
1546	2018-02-05	F	Crew	Rib					R		Trunk	2017-2018
2323	2018-02-06	F	Crew	Scapula				Chronic	R	Muscular Imbalance	Upper Extremity	2017-2018
2325	2018-02-06	F	Crew	Hip					R	Tendinitis	Lower Extremity	2017-2018
2330	2018-02-09	M	Crew	Ankle					L	Cyst	Lower Extremity	2017-2018
1937	2018-02-09	F	Crew	Head					N	Concussion	Head	2017-2018
1861	2018-02-10	M	Crew	Finger				Sub-Acute	R	"Strain (Muscle. tendon)"	Upper Extremity	2017-2018
2331	2018-02-12	F	Crew	Hip					L	Pain	Lower Extremity	2017-2018
2333	2018-02-13	M	Crew	Back					B		Trunk	2017-2018
2337	2018-02-15	F	Crew	Hip					N		Lower Extremity	2017-2018
2342	2018-02-20	F	Crew	Lumbar spine				Chronic	B	Pain	Spine	2017-2018
2269	2018-02-21	F	Crew	Finger					L	Tendinitis	Upper Extremity	2017-2018
2300	2018-02-22	F	Crew	Thoracic spine					L	Muscular Imbalance	Spine	2017-2018
2346	2018-02-23	M	Crew	Shoulder					R	Unspecified Injury	Upper Extremity	2017-2018
1636	2018-02-27	M	Crew	Calcaneus					L		Lower Extremity	2017-2018
2350	2018-02-28	F	Crew	Lower Back					B	Pain	Trunk	2017-2018
2351	2018-03-01	M	Crew	Lower Back					B	Muscular Imbalance	Trunk	2017-2018
1836	2018-03-01	F	Crew	Rib					L	Pain	Trunk	2017-2018
1338	2018-03-02	M	Crew	Back					M	Muscular Imbalance	Trunk	2017-2018
2331	2018-03-09	F	Crew	Head					N	Concussion	Head	2017-2018
1631	2018-03-13	F	Crew	Lower Back					N	Muscular Imbalance	Trunk	2017-2018
2301	2018-03-13	M	Crew	Back					R	Pain	Trunk	2017-2018
2115	2018-03-21	M	Crew	Thoracic spine					N	Pain	Spine	2017-2018
2346	2018-03-26	M	Crew	Lumbar Spine/Pelvis					L	Muscular Imbalance	Spine	2017-2018
2159	2018-03-28	F	Crew	Hamstring				Chronic	R	Unclassified	Lower Extremity	2017-2018
1782	2018-03-28	M	Crew	Lower Back					M		Trunk	2017-2018
1733	2018-04-03	M	Crew	Hamstring				Acute	B	Tendinosis	Lower Extremity	2017-2018
2331	2018-04-05	F	Crew	Back					B	Pain	Trunk	2017-2018
1679	2018-04-07	F	Crew	Lower Back					N	Pain	Trunk	2017-2018
2374	2018-04-09	F	Crew	Knee					L	Plica	Lower Extremity	2017-2018
2375	2018-04-10	F	Crew	Scapula					L	Muscular Imbalance	Upper Extremity	2017-2018
2308	2018-04-10	F	Crew	Back					R	Pain	Trunk	2017-2018
2378	2018-04-12	F	Crew	Back					L	Pain	Trunk	2017-2018
1801	2018-04-17	M	Crew	Rib					L	"Strain (Muscle. tendon)"	Trunk	2017-2018
2310	2018-05-04	M	Crew	Back					N	Muscular Imbalance	Trunk	2017-2018
2400	2018-05-09	M	Crew	Foot					L	Plantar Fascitis	Lower Extremity	2017-2018
2400	2018-05-09	M	Crew	Lower Back					N	Pain	Trunk	2017-2018
1417	2018-05-21	F	Crew	Neck					L	Sprain	Head	2017-2018
1910	2018-06-04	F	Crew	Achiles tendon				Acute	L	Inflammation	Lower Extremity	2017-2018
2415	2018-07-24	F	Crew	Knee					B	Patellofemoral Disorder	Lower Extremity	2017-2018
2472	2018-09-27	M	Crew	Back					B	Pain	Trunk	2018-2019
2473	2018-09-27	M	Crew	Lower Back					N		Trunk	2018-2019
1839	2018-09-27	F	Crew	Knee					B	Knee Pain	Lower Extremity	2018-2019
2478	2018-09-28	F	Crew	Shoulder					L		Upper Extremity	2018-2019
2480	2018-09-28	F	Crew	Shoulder					R		Upper Extremity	2018-2019
2482	2018-09-29	M	Crew	Back					W		Trunk	2018-2019
2478	2018-10-02	F	Crew	Rib				Acute	L	Pain	Trunk	2018-2019
2491	2018-10-03	M	Crew	Toe					N		Lower Extremity	2018-2019
2494	2018-10-05	F	Crew	Shoulder					R	Muscular Imbalance	Upper Extremity	2018-2019
2178	2018-10-08	M	Crew	SI joint					N	Pain	Spine	2018-2019
1936	2018-10-09	M	Crew	Back					L	Muscle	Trunk	2018-2019
2115	2018-10-09	M	Crew	Thoracic spine					L	Spasm/Cramp	Spine	2018-2019
1452	2018-10-11	F	Crew	Scapula					L	Muscular Imbalance	Upper Extremity	2018-2019
2480	2018-10-12	F	Crew	Hip					B	Muscle	Lower Extremity	2018-2019
2518	2018-10-12	M	Crew	Hamstring					B	Pain	Lower Extremity	2018-2019
2308	2018-10-13	F	Crew	Shoulder					L		Upper Extremity	2018-2019
2525	2018-10-14	F	Crew	Scapula				Chronic	R	Pain	Upper Extremity	2018-2019
2146	2018-10-17	M	Crew	Back					W	Strain	Trunk	2018-2019
2325	2018-10-18	F	Crew	Hip				Acute	L	Tendonitis	Lower Extremity	2018-2019
2478	2018-10-18	F	Crew	Back					N	Pain	Trunk	2018-2019
2494	2018-10-25	F	Crew	Back					R		Trunk	2018-2019
2378	2018-10-31	F	Crew	Shoulder					L	Muscular Imbalance	Upper Extremity	2018-2019
2567	2018-10-31	F	Crew	Wrist				Chronic	R	Nerve	Upper Extremity	2018-2019
2491	2018-11-02	M	Crew	SI joint					L	Unclassified	Spine	2018-2019
2572	2018-11-05	F	Crew	Thigh					R	Strain	Trunk	2018-2019
2525	2018-11-06	F	Crew	Hip					R	Bursitis/Tendonitis	Lower Extremity	2018-2019
2579	2018-11-07	F	Crew	Hip					R	"Strain (Muscle. tendon)"	Lower Extremity	2018-2019
1437	2018-11-07	M	Crew	Rib					R	Fracture	Trunk	2018-2019
2567	2018-11-09	F	Crew	Cervical Spine					R	Nerve	Spine	2018-2019
2585	2018-11-09	F	Crew	Lower Back					N	Muscular Imbalance	Trunk	2018-2019
1697	2018-11-09	F	Crew	Shoulder					R	Sprain	Upper Extremity	2018-2019
2494	2018-11-10	F	Crew	Knee					N	Patella Femoral Pain Syndrome	Lower Extremity	2018-2019
2593	2018-11-12	M	Crew	Knee					R	Patella Femoral Pain Syndrome	Lower Extremity	2018-2019
2269	2018-11-13	F	Crew	Neck					B	Muscle	Head	2018-2019
2494	2018-11-16	F	Crew	Head					N		Head	2018-2019
2333	2018-11-17	M	Crew	Head					R	Concussion	Head	2018-2019
2378	2018-11-20	F	Crew	Ankle					L	Sprain	Lower Extremity	2018-2019
2482	2018-11-21	M	Crew	Lower Back					R	Muscular Imbalance	Trunk	2018-2019
2351	2018-11-27	M	Crew	Back					R	Spasm	Trunk	2018-2019
2301	2018-12-04	M	Crew	Knee					R	ITB Syndrome	Lower Extremity	2018-2019
2623	2018-12-14	F	Crew	Shoulder					L	Muscular Imbalance	Upper Extremity	2018-2019
2626	2019-01-04	F	Crew	Hip					L	Inflammation (General)	Lower Extremity	2018-2019
1836	2019-01-07	F	Crew	SI joint					N	Pain	Spine	2018-2019
2634	2019-01-08	F	Crew	Hip					R	Tendonitis	Lower Extremity	2018-2019
2518	2019-01-09	M	Crew	Back				Sub-Acute	B	Muscular Imbalance	Trunk	2018-2019
2159	2019-01-10	F	Crew	Lower Back					N	Pain	Trunk	2018-2019
1546	2019-01-10	F	Crew	Lower Back					N	Pain	Trunk	2018-2019
2159	2019-01-10	F	Crew	Forearm					R	Tendinitis	Upper Extremity	2018-2019
2640	2019-01-11	F	Crew	SI joint					R	Pain	Spine	2018-2019
1417	2019-01-17	F	Crew	Back					W		Trunk	2018-2019
2649	2019-01-17	F	Crew	Hip				Chronic	L		Lower Extremity	2018-2019
2651	2019-01-18	M	Crew	Thoracic spine					N		Spine	2018-2019
2640	2019-01-24	F	Crew	Shoulder					B	Impingement Syndrome	Upper Extremity	2018-2019
1800	2019-01-28	M	Crew	Lower Back					L		Trunk	2018-2019
2663	2019-01-29	M	Crew	Finger					B	Unspecified Injury	Upper Extremity	2018-2019
2666	2019-01-30	F	Crew	Thoracic spine					B	Muscular Imbalance	Spine	2018-2019
2579	2019-01-31	F	Crew	upper trapezius					R	Hyperextension	Trunk	2018-2019
2269	2019-02-05	F	Crew	Hamstring					R	Tendinitis	Lower Extremity	2018-2019
2325	2019-02-05	F	Crew	Shoulder					R	Pain	Upper Extremity	2018-2019
1937	2019-02-06	F	Crew	Foot				Acute	R	Strain	Lower Extremity	2018-2019
2115	2019-02-08	M	Crew	Ankle					R	Sprain	Lower Extremity	2018-2019
2333	2019-02-11	M	Crew	Hand					L	"Strain (Muscle. tendon)"	Upper Extremity	2018-2019
2688	2019-02-13	M	Crew	Shoulder					L	Strain	Upper Extremity	2018-2019
2690	2019-02-17	M	Crew	Knee					L		Lower Extremity	2018-2019
2308	2019-02-18	F	Crew	Thumb					R	Bone	Upper Extremity	2018-2019
2342	2019-02-20	F	Crew	Head					N	Concussion	Head	2018-2019
2178	2019-02-20	M	Crew	Finger					R	Tendinitis	Upper Extremity	2018-2019
2699	2019-02-25	F	Crew	Forearm					L	Compartment syndrome	Upper Extremity	2018-2019
2375	2019-02-28	F	Crew	Nervous/Musculoskeletal					L	Pain	Miscellaneous	2018-2019
2623	2019-03-11	F	Crew	Shoulder					R		Upper Extremity	2018-2019
1682	2019-03-12	F	Crew	Shoulder					R	Pain	Upper Extremity	2018-2019
2473	2019-03-14	M	Crew	Lower Back					B	"Strain (Muscle. tendon)"	Trunk	2018-2019
2724	2019-03-18	M	Crew	Ankle					R	Sprain	Lower Extremity	2018-2019
2623	2019-03-20	F	Crew	Hip					L	Pain	Lower Extremity	2018-2019
2415	2019-03-26	F	Crew	Shoulder					L	Spasm	Upper Extremity	2018-2019
2178	2019-03-29	M	Crew	Thoracic spine					L	Subluxation	Spine	2018-2019
2375	2019-04-02	F	Crew	Ankle					R	Pain	Lower Extremity	2018-2019
2649	2019-04-04	F	Crew	Nervous/Musculoskeletal					R	Pain	Miscellaneous	2018-2019
2585	2019-04-04	F	Crew	Back					R		Trunk	2018-2019
2346	2019-04-04	M	Crew	Lower Back					B	Pain	Trunk	2018-2019
2351	2019-04-09	M	Crew	Knee					L	Bruise	Lower Extremity	2018-2019
2333	2019-04-15	M	Crew	Head					N		Head	2018-2019
2115	2019-04-17	M	Crew	Buttock					R	Contusion	Trunk	2018-2019
1622	2019-04-22	F	Crew	Rib					L	Bruise	Trunk	2018-2019
2634	2019-04-25	F	Crew	Hand					L	Pain	Upper Extremity	2018-2019
2043	2019-05-02	F	Crew	Back					B	Pain	Trunk	2018-2019
2518	2019-05-03	M	Crew	Elbow					L	Tendinitis	Upper Extremity	2018-2019
2115	2019-05-03	M	Crew	Hamstring					L	Pain	Lower Extremity	2018-2019
2623	2019-05-07	F	Crew	Back					B		Trunk	2018-2019
1636	2019-05-28	M	Crew	Back					B	Spasm	Trunk	2018-2019
2118	2019-06-05	M	Crew	Knee					L	"Cartilage Injury (Articular. labrum. meniscus. rib)"	Lower Extremity	2018-2019
2768	2019-06-12	M	Crew	Neck					L	Spasm	Head	2018-2019
2054	2019-08-21	M	Crew	Back					U		Trunk	2019-2020
2634	2019-08-28	F	Crew	Shoulder					R	Muscular Imbalance	Upper Extremity	2019-2020
2525	2019-09-15	F	Crew	Back					B	Pain	Trunk	2019-2020
1937	2019-09-18	F	Crew	Hip					L	Pain	Lower Extremity	2019-2020
2567	2019-09-24	F	Crew	Shoulder					N		Upper Extremity	2019-2020
2494	2019-09-25	F	Crew	Back					W	Muscular Imbalance	Trunk	2019-2020
2827	2019-09-26	M	Crew	Knee					R	Pain	Lower Extremity	2019-2020
2843	2019-10-03	M	Crew	Back					W		Trunk	2019-2020
2480	2019-10-08	F	Crew	Back					R	Pain	Trunk	2019-2020
2855	2019-10-08	M	Crew	Shoulder				Chronic	R	"Strain (Muscle. tendon)"	Upper Extremity	2019-2020
2863	2019-10-09	M	Crew	SI joint					R		Spine	2019-2020
2875	2019-10-13	F	Crew	Shoulder					B	Pain	Upper Extremity	2019-2020
2884	2019-10-15	M	Crew	Knee					L	Tendinosis	Lower Extremity	2019-2020
2886	2019-10-16	M	Crew	Forearm					R	Strain	Upper Extremity	2019-2020
2724	2019-10-17	M	Crew	Back					W	Pain	Trunk	2019-2020
2893	2019-10-18	F	Crew	Lower Back					B	Pain	Trunk	2019-2020
2904	2019-10-21	F	Crew	Back					B	Muscular Imbalance	Trunk	2019-2020
2917	2019-10-26	F	Crew	Back					M	Pain	Trunk	2019-2020
2585	2019-10-28	F	Crew	SI joint					N		Spine	2019-2020
2346	2019-10-30	M	Crew	Head					N	Unspecified Injury	Head	2019-2020
2927	2019-10-30	M	Crew	Back					B	Pain	Trunk	2019-2020
2928	2019-10-31	M	Crew	General medicine					N		Miscellaneous	2019-2020
2933	2019-11-03	F	Crew	Back					N	Pain	Trunk	2019-2020
2768	2019-11-04	M	Crew	Thoracic spine					B	Pain	Spine	2019-2020
2827	2019-11-08	M	Crew	Back					B	Unspecified Injury	Trunk	2019-2020
2949	2019-11-10	F	Crew	Shoulder					B	Muscular Imbalance	Upper Extremity	2019-2020
2954	2019-11-13	F	Crew	Knee					L	Pain	Lower Extremity	2019-2020
2337	2019-11-14	F	Crew	Back					B	Pain	Trunk	2019-2020
2960	2019-11-14	F	Crew	Back					B	Pain	Trunk	2019-2020
2269	2019-11-15	F	Crew	General medicine					N		Miscellaneous	2019-2020
2965	2019-11-16	F	Crew	Knee					B	Pain	Lower Extremity	2019-2020
2567	2019-11-18	F	Crew	Lumbar spine					N	Unspecified Injury	Spine	2019-2020
2626	2019-11-19	F	Crew	Forearm					B	Pain	Upper Extremity	2019-2020
1996	2019-12-04	F	Crew	Finger					R	Pain	Upper Extremity	2019-2020
2927	2019-12-09	M	Crew	Sacrum					N	Bruise	Spine	2019-2020
2827	2019-12-12	M	Crew	Head					N	Concussion	Head	2019-2020
2827	2019-12-12	M	Crew	Clavicle					R	Fracture	Upper Extremity	2019-2020
2884	2020-01-03	M	Crew	Knee					R	Tendinitis	Lower Extremity	2019-2020
2491	2020-01-07	M	Crew	Back					N	Muscular Imbalance	Trunk	2019-2020
3001	2020-01-08	M	Crew	Finger					R	Sprain	Upper Extremity	2019-2020
3002	2020-01-09	F	Crew	Hamstring					L	Strain	Lower Extremity	2019-2020
3001	2020-01-13	M	Crew	Back					U	Pain	Trunk	2019-2020
2482	2020-01-14	M	Crew	Shoulder					L	Strain	Upper Extremity	2019-2020
3016	2020-01-17	F	Crew	Back					N	Pain	Trunk	2019-2020
1839	2020-01-24	F	Crew	Ankle					R	Pain	Lower Extremity	2019-2020
3027	2020-01-25	F	Crew	Wrist					L	Pain	Upper Extremity	2019-2020
3030	2020-01-28	F	Crew	Back					B	Pain	Trunk	2019-2020
2054	2020-01-29	M	Crew	Hand					R	Blister	Upper Extremity	2019-2020
3031	2020-01-30	F	Crew	Hamstring					L	Tendon	Lower Extremity	2019-2020
2626	2020-01-30	F	Crew	Shoulder					B	Pain	Upper Extremity	2019-2020
3045	2020-02-07	F	Crew	Back					N	Pain	Trunk	2019-2020
2886	2020-02-10	M	Crew	Knee					R	Pain	Lower Extremity	2019-2020
3053	2020-02-13	M	Crew	Head					L	Unspecified Injury	Head	2019-2020
2904	2020-02-15	F	Crew	Thumb					L	Sprain	Upper Extremity	2019-2020
2855	2020-04-21	M	Crew	Chest/T-spine/Ribs					R	"Strain (Muscle. tendon)"	Spine	2019-2020
2525	2020-07-24	F	Crew	Back					M	stress reaction	Trunk	2019-2020
2640	2020-08-15	F	Crew	Head					N	Concussion	Head	2020-2021
2644	2019-01-15	F	Crew; Cross Country	Back					U	Muscular Imbalance	Trunk	2018-2019
2644	2019-03-16	F	Crew; Cross Country	Hip					L	Strain	Lower Extremity	2018-2019
2644	2019-10-16	F	Crew; Cross Country	Shoulder					L	Muscular Imbalance	Upper Extremity	2019-2020
2644	2019-12-11	F	Crew; Cross Country	Head					N	Concussion	Head	2019-2020
2644	2020-02-24	F	Crew; Cross Country	Back					B	Pain	Trunk	2019-2020
1745	2016-09-14	F	Crew; Volleyball	Sacrum	"ATR: Working on strength and posture. Weight Room: As tolerated. may have issues with OH movements. scapular stabilization and RC strengthening is encouraged and can be added when modifications are needed. Sport: As tolerated. can progress back into full participation."			Chronic	L	Sprain/Strain	Spine	2016-2017
1745	2017-04-06	F	Crew; Volleyball	Hip	"ATR: Working on strength and posture. Weight Room: As tolerated. may have issues with OH movements. scapular stabilization and RC strengthening is encouraged and can be added when modifications are needed. Sport: As tolerated. can progress back into full participation."				L	Spasm	Lower Extremity	2016-2017
1745	2017-04-20	F	Crew; Volleyball	Head	"ATR: Working on strength and posture. Weight Room: As tolerated. may have issues with OH movements. scapular stabilization and RC strengthening is encouraged and can be added when modifications are needed. Sport: As tolerated. can progress back into full participation."				N		Head	2016-2017
1745	2017-09-06	F	Crew; Volleyball	Shoulder	"ATR: Working on strength and posture. Weight Room: As tolerated. may have issues with OH movements. scapular stabilization and RC strengthening is encouraged and can be added when modifications are needed. Sport: As tolerated. can progress back into full participation."				L	Pain	Upper Extremity	2017-2018
1745	2017-10-10	F	Crew; Volleyball	Knee	"ATR: Working on strength and posture. Weight Room: As tolerated. may have issues with OH movements. scapular stabilization and RC strengthening is encouraged and can be added when modifications are needed. Sport: As tolerated. can progress back into full participation."				B	Tendonitis	Lower Extremity	2017-2018
1745	2020-01-16	F	Crew; Volleyball	Thigh	"ATR: Working on strength and posture. Weight Room: As tolerated. may have issues with OH movements. scapular stabilization and RC strengthening is encouraged and can be added when modifications are needed. Sport: As tolerated. can progress back into full participation."				L	Pain	Trunk	2019-2020
2625	2019-01-01	F	Crew; Water Polo	Back					B	Pain	Trunk	2018-2019
8	2011-09-14	F	Cross Country	Hip					L	"Fracture (Acute. avulsion. stress)"	Lower Extremity	2011-2012
38	2012-07-12	M	Cross Country	Knee	"no restrictions. under preventative care"				L	Patella Femoral Pain Syndrome	Lower Extremity	2011-2012
52	2012-08-07	M	Cross Country	Hip	Pt. plantar fascia clinically appears to be improving. The pt. reports no pain due to not running. Pt. will continue rehabilitation and acupuncture.				L	Strain	Lower Extremity	2012-2013
56	2012-08-13	M	Cross Country	Calf	I have not seen much of Grant over the past two weeks. When I do see him he states that he is feeling better but that he is still having tightness. I will continue to work with him as he is in the ATR.				L	Strain	Lower Extremity	2012-2013
57	2012-08-13	F	Cross Country	Hip	"MD appointment tomorrow. Wednesday May 1. 2013"			Acute	L	"Strain (Muscle. tendon)"	Lower Extremity	2012-2013
60	2012-08-13	F	Cross Country	Hamstring					R	"Strain (Muscle. tendon)"	Lower Extremity	2012-2013
64	2012-08-13	F	Cross Country	Knee	not seen in ATR this week				L	ITB Syndrome	Lower Extremity	2012-2013
8	2012-08-15	F	Cross Country	Lower Back					R	Pain	Trunk	2012-2013
75	2012-08-16	M	Cross Country	Ankle					R	Sprain	Lower Extremity	2012-2013
83	2012-08-17	F	Cross Country	Hip				Chronic	R	Spasm	Lower Extremity	2012-2013
89	2012-08-20	F	Cross Country	Foot	Pt. has resumed her 1xweekly rehabilitation. On Saturday the pt. reported that her feet were feeling fine but she also reported that she wore her trainers instead of her racing shoes. She asked about a pain she was having in her ribs while breathing. I told her to come into the ATR this week but I have not seen her yet.				B	Nerve	Lower Extremity	2012-2013
64	2012-08-31	F	Cross Country	Achilles tendon	not seen in ATR this week				R	Inflammation	Lower Extremity	2012-2013
116	2012-09-01	M	Cross Country	Knee	Pt. has been dismissed from rehabilitation within the ATR and will be completing a home maintenance plan on his own. I will make plans to re-evaluate him and resolve his injury this week via e-mail.				R	ITB Syndrome	Lower Extremity	2012-2013
117	2012-09-01	F	Cross Country	Knee	All activity as tolerated. Have not seen in ATR				L	Pain	Lower Extremity	2012-2013
60	2012-09-03	F	Cross Country	Foot / Ankle					B	Plantar Fascitis	Lower Extremity	2012-2013
119	2012-09-04	F	Cross Country	Hip	under treatment with Allison Pastor ATC				R	Muscular Imbalance	Lower Extremity	2012-2013
122	2012-09-05	F	Cross Country	Back	Pt. is coming off of a bad weekend. She reports that she is beginning to feel better. She has been in the ATR working on her core and this seems to alleviate the pain.				W	Pain	Trunk	2012-2013
129	2012-09-06	F	Cross Country	Thigh	Pt. reported sustaining and injury while moving this week. She seems to have irritated her hamstring and adductors. We are working to resolve this injury. She seems to be making progress.				L	Muscle	Trunk	2012-2013
57	2012-09-06	F	Cross Country	Wrist	"MD appointment tomorrow. Wednesday May 1. 2013"				R	Cyst	Upper Extremity	2012-2013
136	2012-09-08	F	Cross Country	Achilles tendon					L	Tendinitis	Lower Extremity	2012-2013
122	2012-09-12	F	Cross Country	Lower Leg	Pt. is coming off of a bad weekend. She reports that she is beginning to feel better. She has been in the ATR working on her core and this seems to alleviate the pain.				B	Inflammation	Lower Extremity	2012-2013
38	2012-09-14	M	Cross Country	Foot	"no restrictions. under preventative care"				B	Plantar Fascitis	Lower Extremity	2012-2013
154	2012-09-19	M	Cross Country	Ankle / foot	When I spoke with the pt. last week he reported no pain. I will follow up with him this week via e-mail and resolve the injury if at all possible.				R	Pain	Lower Extremity	2012-2013
173	2012-09-24	M	Cross Country	Knee	Pt. is feeling significantly better this week. I am having him continue treatment this week to make sure that this improvement is not solely due to the down week last week. He is to run as tolerated.				R	Pain	Lower Extremity	2012-2013
8	2012-10-12	F	Cross Country	Shins					B	stress reaction	Lower Extremity	2012-2013
431	2012-11-26	M	Cross Country	Foot					R	Plantar Fascitis	Lower Extremity	2012-2013
83	2012-12-06	F	Cross Country	Foot					L	Pain	Lower Extremity	2012-2013
463	2012-12-15	M	Cross Country	Foot					L	Contusion	Lower Extremity	2012-2013
60	2013-02-01	F	Cross Country	Foot					L	stress reaction	Lower Extremity	2012-2013
57	2013-02-07	F	Cross Country	Hip	"MD appointment tomorrow. Wednesday May 1. 2013"				R	Spasm	Lower Extremity	2012-2013
606	2013-02-25	M	Cross Country	Achiles tendon					R	Tendonitis	Lower Extremity	2012-2013
617	2013-03-04	F	Cross Country	Foot					R	Contusion	Lower Extremity	2012-2013
119	2013-03-13	F	Cross Country	Hip	under treatment with Allison Pastor ATC				L	Pain	Lower Extremity	2012-2013
665	2013-04-13	M	Cross Country	Foot				Acute	L	Contusion	Lower Extremity	2012-2013
463	2013-05-31	M	Cross Country	Foot/Ankle				Acute	R	Tendinitis	Lower Extremity	2012-2013
173	2013-06-07	M	Cross Country	Hamstring	Pt. is feeling significantly better this week. I am having him continue treatment this week to make sure that this improvement is not solely due to the down week last week. He is to run as tolerated.				L	Strain	Lower Extremity	2012-2013
708	2013-06-13	F	Cross Country	Lower Limb				Sub-Acute	L	Strain	Lower Extremity	2012-2013
713	2013-08-19	M	Cross Country	Knee	"Running as tolerated. full activity in weightroom"			Chronic	L	Bursitis/Tendonitis	Lower Extremity	2013-2014
716	2013-08-20	F	Cross Country	Foot	monitor pain			Chronic	R	"Strain (Muscle. tendon)"	Lower Extremity	2013-2014
724	2013-08-24	M	Cross Country	Hip	monitor S+S			Chronic	R	Peripheral Nerve	Lower Extremity	2013-2014
734	2013-09-05	F	Cross Country	SI joint				Acute	L	Sprain	Spine	2013-2014
743	2013-09-13	F	Cross Country	Wrist					R	Contusion	Upper Extremity	2013-2014
716	2013-10-03	F	Cross Country	Calf	monitor pain				L		Lower Extremity	2013-2014
117	2013-10-27	F	Cross Country	Shoulder	All activity as tolerated. Have not seen in ATR				L	Subluxation / Dislocation	Upper Extremity	2013-2014
617	2014-01-11	F	Cross Country	Leg					L	Spasm	Lower Extremity	2013-2014
606	2014-02-25	M	Cross Country	Hip					B	Muscular Imbalance	Lower Extremity	2013-2014
743	2014-02-25	F	Cross Country	Hamstring					L	Strain	Lower Extremity	2013-2014
136	2014-03-04	F	Cross Country	Hip					R	Muscle	Lower Extremity	2013-2014
56	2014-03-11	M	Cross Country	Calf	I have not seen much of Grant over the past two weeks. When I do see him he states that he is feeling better but that he is still having tightness. I will continue to work with him as he is in the ATR.			Acute	R	Spasm	Lower Extremity	2013-2014
734	2014-03-17	F	Cross Country	Calcaneus					B	Bruise	Lower Extremity	2013-2014
1005	2014-04-01	F	Cross Country	Tibia					R	Pain	Lower Extremity	2013-2014
617	2014-04-29	F	Cross Country	Hand					L	"Fracture (Acute. avulsion. stress)"	Upper Extremity	2013-2014
734	2014-05-08	F	Cross Country	Rib					R	Subluxation	Trunk	2013-2014
89	2014-07-28	F	Cross Country	Lower Leg	Pt. has resumed her 1xweekly rehabilitation. On Saturday the pt. reported that her feet were feeling fine but she also reported that she wore her trainers instead of her racing shoes. She asked about a pain she was having in her ribs while breathing. I told her to come into the ATR this week but I have not seen her yet.			Acute	R	"Strain (Muscle. tendon)"	Lower Extremity	2013-2014
606	2014-09-12	M	Cross Country	Knee				Sub-Acute	L	ITB Syndrome	Lower Extremity	2014-2015
617	2014-10-16	F	Cross Country	Piriformis					N	Sprain/Strain	Trunk	2014-2015
724	2014-11-26	M	Cross Country	Hamstring	monitor S+S				L	Strain	Lower Extremity	2014-2015
64	2015-01-21	F	Cross Country	Wrist	not seen in ATR this week			Acute	L		Upper Extremity	2014-2015
75	2015-02-03	M	Cross Country	Lower Leg					B	Inflammation	Lower Extremity	2014-2015
75	2015-04-19	M	Cross Country	Head					N	Concussion	Head	2014-2015
1715	2016-08-15	M	Cross Country	Ankle				Acute	L	Sprain/Strain	Lower Extremity	2016-2017
1730	2016-08-24	F	Cross Country	Knee	Have not seen in ATR since eval.				R		Lower Extremity	2016-2017
1737	2016-09-07	F	Cross Country	Ankle	All activity as tolerated. Have not seen in ATR this week.				R	Sprains / Strains	Lower Extremity	2016-2017
1756	2016-09-20	M	Cross Country	Calf	All activity to tolerance.				B	Spasm	Lower Extremity	2016-2017
1921	2017-01-13	M	Cross Country	Foot	All activity as tolerated.				R	stress reaction	Lower Extremity	2016-2017
1730	2017-03-03	F	Cross Country	Thigh	Have not seen in ATR since eval.				R	Muscle	Trunk	2016-2017
1921	2017-06-09	M	Cross Country	Head	All activity as tolerated.				N	Concussion	Head	2016-2017
2064	2017-08-15	F	Cross Country	Knee					R	"Strain (Muscle. tendon)"	Lower Extremity	2017-2018
2067	2017-08-16	M	Cross Country	Knee	"All activity as tolerated. Continue Alter-G Supplementation and increasing BW running as tolerated. Work on single leg loading. and squat mechanics to alleviate pressure on knees."				B	Tendinitis	Lower Extremity	2017-2018
2068	2017-08-17	F	Cross Country	Foot	"Continue running progression in Alter-G to increase to full BW. Once at full BW. begin running progression as tolerated. Once full body weight. begin drop and stick progression in weight room. Have not seen in ATR."			Chronic	B	"Pain. metatarsalgia"	Lower Extremity	2017-2018
2069	2017-08-17	F	Cross Country	Sacrum	"Continue strengthening and Mobility work in ATR. Ok for lifting progression as tolerated started with BW activity for Plantar flextion movements. If pain free by Weds. 11.15.17. begin Running progression in Alter-G at 30% BW progressing as tolerated. Follow up with doctors in 2 weeks. All activity as tolerated. Working on Hip and Piriformis mobility."			Chronic	L	Pain	Spine	2017-2018
2090	2017-09-01	M	Cross Country	Knee					B	Tendinitis	Lower Extremity	2017-2018
2093	2017-09-05	F	Cross Country	Pelvis	All activity as tolerated. Working on soft tissue mobility in ATR.				R	Strain	Trunk	2017-2018
2097	2017-09-15	F	Cross Country	Hamstring	All activity as tolerated. Add into individual plan posterior chain focus for glute max activation.				L	Inflammation	Lower Extremity	2017-2018
2119	2017-10-05	F	Cross Country	Ankle	"Progress activity as tolerated. Add Single leg calf raises. and eccentric heel chord work into Personal Performance plan."			Sub-Acute	L	Inflammation	Lower Extremity	2017-2018
2138	2017-10-11	F	Cross Country	Calf					L		Lower Extremity	2017-2018
2069	2017-10-12	F	Cross Country	Ankle	"Continue strengthening and Mobility work in ATR. Ok for lifting progression as tolerated started with BW activity for Plantar flextion movements. If pain free by Weds. 11.15.17. begin Running progression in Alter-G at 30% BW progressing as tolerated. Follow up with doctors in 2 weeks. All activity as tolerated. Working on Hip and Piriformis mobility."				L	Sprain	Lower Extremity	2017-2018
2138	2017-11-10	F	Cross Country	Foot					R	Plantar Fascitis	Lower Extremity	2017-2018
2314	2018-01-29	M	Cross Country	Ankle					R	Sprain	Lower Extremity	2017-2018
2068	2018-01-31	F	Cross Country	Piriformis	"Continue running progression in Alter-G to increase to full BW. Once at full BW. begin running progression as tolerated. Once full body weight. begin drop and stick progression in weight room. Have not seen in ATR."			Acute	R	"Strain (Muscle. tendon)"	Trunk	2017-2018
2090	2018-03-13	M	Cross Country	Thigh					L	Pain	Trunk	2017-2018
2097	2018-05-22	F	Cross Country	Head	All activity as tolerated. Add into individual plan posterior chain focus for glute max activation.				N	Laceration	Head	2017-2018
2138	2018-06-01	F	Cross Country	Thigh					L	ITB Syndrome	Trunk	2017-2018
2410	2018-06-11	F	Cross Country	Knee				Acute	R	ITB Syndrome	Lower Extremity	2017-2018
2413	2018-07-23	M	Cross Country	Foot					N		Lower Extremity	2017-2018
2422	2018-08-13	M	Cross Country	Ankle					L	Tendinosis	Lower Extremity	2018-2019
2442	2018-08-29	F	Cross Country	Ankle					R	Pain	Lower Extremity	2018-2019
2119	2018-08-31	F	Cross Country	Lower Leg	"Progress activity as tolerated. Add Single leg calf raises. and eccentric heel chord work into Personal Performance plan."				R	Pain	Lower Extremity	2018-2019
2448	2018-09-06	F	Cross Country	Achilles tendon					R	Bursitis/Tendonitis	Lower Extremity	2018-2019
2457	2018-09-16	M	Cross Country	Elbow					L	Fracture	Upper Extremity	2018-2019
2442	2018-09-18	F	Cross Country	Achilles tendon					L	Tendinitis	Lower Extremity	2018-2019
2410	2018-09-18	F	Cross Country	Thigh					B	"Strain (Muscle. tendon)"	Trunk	2018-2019
2067	2018-09-20	M	Cross Country	Achilles tendon	"All activity as tolerated. Continue Alter-G Supplementation and increasing BW running as tolerated. Work on single leg loading. and squat mechanics to alleviate pressure on knees."				L	Tendinitis	Lower Extremity	2018-2019
2314	2018-09-25	M	Cross Country	General medicine					N	Contusion	Miscellaneous	2018-2019
2481	2018-09-29	M	Cross Country	Achilles tendon					L	Inflammation	Lower Extremity	2018-2019
2485	2018-10-01	F	Cross Country	Shoulder					B	Muscular Imbalance	Upper Extremity	2018-2019
2521	2018-10-12	M	Cross Country	Piriformis					B	Muscular Imbalance	Trunk	2018-2019
2522	2018-10-12	F	Cross Country	Ankle					L	"Fracture (Acute. avulsion. stress)"	Lower Extremity	2018-2019
2410	2018-11-15	F	Cross Country	Foot					L	Inflammation	Lower Extremity	2018-2019
2604	2018-11-16	F	Cross Country	Foot					R	Pain	Lower Extremity	2018-2019
2413	2018-12-15	M	Cross Country	Hip					R	Muscular Imbalance	Lower Extremity	2018-2019
2481	2019-01-07	M	Cross Country	Knee					R	Pain	Lower Extremity	2018-2019
2485	2019-01-11	F	Cross Country	Foot / Ankle				Acute	L	"Strain (Muscle. tendon)"	Lower Extremity	2018-2019
2522	2019-02-08	F	Cross Country	Lower Leg					B	stress reaction	Lower Extremity	2018-2019
2457	2019-02-19	M	Cross Country	Back					B	Inflammation (General)	Trunk	2018-2019
2725	2019-03-18	F	Cross Country	Tibia/Shin					B	stress reaction	Lower Extremity	2018-2019
2779	2019-08-21	F	Cross Country	Shins				Acute	B	"Strain (Muscle. tendon)"	Lower Extremity	2019-2020
2788	2019-08-23	F	Cross Country	Back				Chronic	R	Strain	Trunk	2019-2020
2789	2019-08-23	F	Cross Country	Hip				Sub-Acute	R	Pain	Lower Extremity	2019-2020
2790	2019-08-23	F	Cross Country	Knee				Chronic	B	Tendinosis	Lower Extremity	2019-2020
2485	2019-08-27	F	Cross Country	Foot				Sub-Acute	B	Strain	Lower Extremity	2019-2020
2788	2019-09-10	F	Cross Country	Foot / Ankle					B	Unclassified	Lower Extremity	2019-2020
2485	2019-09-11	F	Cross Country	Knee				Sub-Acute	R	Patella Femoral Pain Syndrome	Lower Extremity	2019-2020
2810	2019-09-16	M	Cross Country	Lower Leg					B	Pain	Lower Extremity	2019-2020
2811	2019-09-16	M	Cross Country	Ankle / foot					R	Sprain	Lower Extremity	2019-2020
2814	2019-09-17	F	Cross Country	Knee				Sub-Acute	B	Pain	Lower Extremity	2019-2020
2314	2019-09-19	M	Cross Country	Knee					N		Lower Extremity	2019-2020
2822	2019-09-24	F	Cross Country	Hip					R	Pain	Lower Extremity	2019-2020
2842	2019-10-03	M	Cross Country	Knee					B	Patella Femoral Pain Syndrome	Lower Extremity	2019-2020
2853	2019-10-08	F	Cross Country	Back					B	Pain	Trunk	2019-2020
2853	2019-10-15	F	Cross Country	Toe					R	Contusion / strain / sprain / fracture	Lower Extremity	2019-2020
2894	2019-10-18	M	Cross Country	Hip					N	Contusion	Lower Extremity	2019-2020
2842	2019-10-29	M	Cross Country	Calf					L		Lower Extremity	2019-2020
2314	2019-11-04	M	Cross Country	Knee					L	ITB Syndrome	Lower Extremity	2019-2020
2788	2019-11-12	F	Cross Country	Lower Leg					L	Pain	Lower Extremity	2019-2020
2790	2019-11-12	F	Cross Country	Foot					L	Plantar Fascitis	Lower Extremity	2019-2020
2972	2019-11-20	M	Cross Country	Wrist					L	Fracture	Upper Extremity	2019-2020
2998	2020-01-07	F	Cross Country	Shoulder					L	Pain	Upper Extremity	2019-2020
2853	2020-01-28	F	Cross Country	Shins					L	Pain	Lower Extremity	2019-2020
1921	2020-02-22	M	Cross Country	Hamstring	All activity as tolerated.				N	Strain	Lower Extremity	2019-2020
2779	2020-03-03	F	Cross Country	Knee					R	Pain	Lower Extremity	2019-2020
2522	2020-06-26	F	Cross Country	Back					U	"Strain (Muscle. tendon)"	Trunk	2019-2020
3276	2022-04-26	F	Cross Country	Right Lower Leg Foot	Weak inversion muscles as well as limited great toe mobility. Work on strengthening the lower extremities and mobility in the 1st MTP joint and R foot						Lower Extremity	2021-2022
3099	2022-04-25	M	Cross Country	Right Pelvis, Hip and Groin	"General Instability of the R hip Enrollment in hip DS care for tomorrow (4/26 1pm) HEP isometrics"	Instability of Hip Jt/ Groin	Right Hip and Groin GUXX Instability of Hip Jt/ Groin				Trunk	2021-2022
3213	2022-04-20	M	Cross Country		Weak and tight anterior tibias. overactive peroneals and soleus						Lower Extremity	2021-2022
2842	2022-04-10	M	Cross Country	Left Chest Shoulder							Upper Extremity	2021-2022
2842	2022-03-18	M	Cross Country	Knee	ITB tightness	ITB friction syndrome	Left Knee KGIX ITB friction syndrome				Lower Extremity	2021-2022
2481	2022-03-24	M	Cross Country	Right Posterior Upper Leg							Lower Extremity	2021-2022
2810	2022-03-23	M	Cross Country	Left Upper Leg	Left Leg Pain						Lower Extremity	2021-2022
3118	2022-02-21	M	Cross Country	Right Posterior Lower Leg Foot							Lower Extremity	2021-2022
3131	2022-02-05	M	Cross Country	Right Posterior Lower Leg Foot	General R calf tightness						Lower Extremity	2021-2022
2842	2022-01-10	M	Cross Country	Left Lower Leg Foot							Lower Extremity	2021-2022
3276	2021-10-14	F	Cross Country	Right Lower Leg Foot	R bunion with hallux valgus						Lower Extremity	2021-2022
2779	2021-11-18	F	Cross Country	Left Lumbar	"#. General lower back pain due to muscular tightness. L hip upslip. HS and piriformis tightness. Neuro WNL. ruled out disc and facet injury."						Spine	2021-2022
3180	2021-10-19	F	Cross Country	Right Lower Leg Foot, Foot	Possible great toe extensor tendon injury due to over stretching mechanism	Foot Muscle Strain/ Spasm/ trigger Points	Possible great toe extensor tendon injury				Lower Extremity	2021-2022
2485	2021-09-18	F	Cross Country	Right Lower Leg Foot	Plantar fascia pain						Lower Extremity	2021-2022
2481	2021-09-26	M	Cross Country	Left Upper Leg							Lower Extremity	2021-2022
3199	2021-09-09	F	Cross Country	Right Lower Leg Foot	Plantar Fasciitis linked with weak R adductors and pn in the R post tib		Plantar Fasciitis				Lower Extremity	2021-2022
2998	2021-08-24	F	Cross Country	Right Lower Leg Foot, Lower Leg	Medial Tibial Stress Syndrome / Inflammation of Posterior Tibialis	Anterior shin periostitis/ stress syndrome/ shin splints	Right Anterior Lower Leg QYBA Anterior shin periostitis/ stress syndrome/ shin splints				Lower Extremity	2021-2022
2442	2021-08-14	F	Cross Country								Trunk	2021-2022
3292	2021-08-15	M	Cross Country		Proximal semis tendinopathy						Lower Extremity	2021-2022
2842	2021-07-16	M	Cross Country		tight ITB and Lateral hamstring		Muscle tightness				Lower Extremity	2020-2021
3211	2021-07-01	M	Cross Country								Miscellaneous	2020-2021
3213	2021-06-25	M	Cross Country	Right Lower Leg Foot			plantar fasciitis and ATFL sprain				Lower Extremity	2020-2021
2442	2021-06-16	F	Cross Country				plantar fasciitis vs calf tighness				Lower Extremity	2020-2021
3199	2021-05-03	F	Cross Country				tight calves				Lower Extremity	2020-2021
3199	2021-02-26	F	Cross Country				tight calves				Lower Extremity	2020-2021
2972	2021-04-28	M	Cross Country	Right Posterior Upper Leg, Thigh		Hamstring strain	Right Posterior Thigh TMHX Hamstring strain				Lower Extremity	2020-2021
2972	2021-04-28	M	Cross Country								Miscellaneous	2020-2021
2972	2021-04-27	M	Cross Country		Hamstring strain vs. rupture.		Hamstring strain				Lower Extremity	2020-2021
3131	2021-02-25	M	Cross Country	Right Pelvis							Trunk	2020-2021
2894	2021-04-14	M	Cross Country	Left Posterior Lower Leg Foot							Lower Extremity	2020-2021
3213	2021-04-14	M	Cross Country	Right Posterior Lower Leg Foot			tib posterior weakness/fatigue				Lower Extremity	2020-2021
2853	2021-03-22	F	Cross Country				calf tightness				Lower Extremity	2020-2021
2790	2021-03-12	F	Cross Country		Lateral Ankle Sprain of ATF and CF with Peroneal Strain.		Lateral Ankle Sprain				Lower Extremity	2020-2021
3131	2021-02-25	M	Cross Country								Miscellaneous	2020-2021
3245	2021-02-24	F	Cross Country				plantar faciitis				Lower Extremity	2020-2021
2810	2021-02-08	M	Cross Country				adductor strain vs imbalance vs tightness				Lower Extremity	2020-2021
2972	2021-01-22	M	Cross Country				IT band tightness				Lower Extremity	2020-2021
3131	2021-01-06	M	Cross Country	Ankle		Anterior talofibular ligament sprain	Left Anterior Ankle AJLA Anterior talofibular ligament sprain				Lower Extremity	2020-2021
3131	2020-11-17	M	Cross Country				Tight Calf- stress on Achilles causing heel pain				Lower Extremity	2020-2021
2485	2020-11-16	F	Cross Country		Tight hip flexor- cupped quad and released hip flexor-- treatment 2-3 times a week		Tight hip flexor				Lower Extremity	2020-2021
2822	2020-11-12	F	Cross Country				Lateral Ankle Sprain				Lower Extremity	2020-2021
3213	2020-11-11	M	Cross Country		Hamstring and TFL tightness		Upper leg musculature tightness				Lower Extremity	2020-2021
3131	2020-11-06	M	Cross Country				turf toe				Lower Extremity	2020-2021
3131	2020-10-23	M	Cross Country		"Tight hamstrings. but strong musculature"		Tight hamstrings				Lower Extremity	2020-2021
2485	2020-10-23	F	Cross Country				Muscular imbalance				Lower Extremity	2020-2021
2810	2020-10-22	M	Cross Country		"Cupped lower back- erector spinae. and QL; stretched HS. Sent home with stretching and back mobility exercises"		Erector Spinae Group Tightness				Trunk	2020-2021
3180	2020-10-16	F	Cross Country								Lower Extremity	2020-2021
3302	2022-04-20	M	Cross Country	Other	Weak and tight anterior tibias. overactive peroneals and soleus						Lower Extremity	2021-2022
3315	2021-11-18	F	Cross Country	Other	"#. General lower back pain due to muscular tightness. L hip upslip. HS and piriformis tightness. Neuro WNL. ruled out disc and facet injury."						Trunk	2021-2022
3329	2021-08-24	F	Cross Country	Other, Lower Leg QYBA shin periostitis/ stress syndrome/ shin splints	Medial Tibial Stress Syndrome / Inflammation of Posterior Tibialis	Right Anterior Lower Leg QYBA Anterior shin periostitis/ stress syndrome/ shin splints	Right Anterior Lower Leg QYBA Anterior shin periostitis/ stress syndrome/ shin splints				Lower Extremity	2021-2022
3333	2021-08-14	F	Cross Country	Other							Trunk	2021-2022
3302	2021-06-25	M	Cross Country	Other							Miscellaneous	2020-2021
3333	2021-06-16	F	Cross Country	Other							Miscellaneous	2020-2021
3354	2021-04-28	M	Cross Country	Other, Thigh TMHX Hamstring strain		Right Posterior Thigh TMHX Hamstring strain	Right Posterior Thigh TMHX Hamstring strain				Lower Extremity	2020-2021
3354	2021-04-27	M	Cross Country	Other							Miscellaneous	2020-2021
3357	2021-04-20	M	Cross Country	Other, Lower Leg QMYP Peroneal trigger points/ spasm		Left Posterior Lower Leg QMYP Peroneal trigger points/ spasm	Left Posterior Lower Leg QMYP Peroneal trigger points/ spasm				Lower Extremity	2020-2021
3302	2021-04-14	M	Cross Country	Other		tib posterior weakness/fatigue	tib posterior weakness/fatigue				Lower Extremity	2020-2021
3359	2021-04-14	M	Cross Country	Other							Miscellaneous	2020-2021
3391	2020-10-09	F	Cross Country	Other							Miscellaneous	2020-2021
3397	2022-07-16	F	Cross Country	Upper Extremity	"Pec and upper trap rightness. elevated first rib"						Upper Extremity	2021-2022
3406	2022-06-24	F	Cross Country	Lower Extremity							Lower Extremity	2021-2022
3406	2022-06-16	F	Cross Country								Lower Extremity	2021-2022
2481	2022-06-06	M	Cross Country		L Achilles Tendonitis		L Achilles Tendonitis				Lower Extremity	2021-2022
3099	2022-04-25	M	Cross Country	Hip and Groin GUXX Instability of Hip Jt/ Groin	"General Instability of the R hip Enrollment in hip DS care for tomorrow (4/26 1pm) HEP isometrics"	Right Hip and Groin GUXX Instability of Hip Jt/ Groin					Lower Extremity	2021-2022
2842	2022-04-10	M	Cross Country								Trunk	2021-2022
2481	2022-03-24	M	Cross Country								Lower Extremity	2021-2022
3276	2021-10-14	F	Cross Country		R bunion with hallux valgus						Lower Extremity	2021-2022
2485	2021-09-18	F	Cross Country		Plantar fascia pain						Lower Extremity	2021-2022
3199	2021-09-09	F	Cross Country		Plantar Fasciitis linked with weak R adductors and pn in the R post tib	Plantar Fasciitis					Lower Extremity	2021-2022
2842	2021-07-16	M	Cross Country	Limited R arch mobility	Muscle tightness		Muscle tightness				Lower Extremity	2020-2021
3406	2021-04-28	F	Cross Country								Miscellaneous	2020-2021
2810	2021-02-08	M	Cross Country			adductor strain vs imbalance vs tightness					Lower Extremity	2020-2021
3397	2021-01-19	F	Cross Country								Miscellaneous	2020-2021
3180	2021-01-06	F	Cross Country	Medical Illness MIVX Systemic Viral Infection ( excl viruses localised to one area)			COVID-19				Miscellaneous	2020-2021
3199	2020-12-28	F	Cross Country	Medical Illness MNEX Epilepsy	Athlete was previously screened during PPE for history of seizure activity.		Seizure Disorder				Miscellaneous	2020-2021
2485	2020-11-16	F	Cross Country								Miscellaneous	2020-2021
2822	2020-11-12	F	Cross Country								Miscellaneous	2020-2021
2810	2020-10-12	M	Cross Country								Miscellaneous	2020-2021
3292	2021-08-15	M	Cross Country		Proximal semis tendinopathy						Lower Extremity	2021-2022
3211	2021-07-01	M	Cross Country								Miscellaneous	2020-2021
3199	2021-05-03	F	Cross Country				tight calves				Lower Extremity	2020-2021
3199	2021-02-26	F	Cross Country				tight calves				Lower Extremity	2020-2021
3406	2021-03-12	F	Cross Country		Lateral Ankle Sprain of ATF and CF with Peroneal Strain.		Lateral Ankle Sprain				Lower Extremity	2020-2021
2810	2021-02-08	M	Cross Country								Miscellaneous	2020-2021
2485	2020-10-23	F	Cross Country				Muscular imbalance				Trunk	2020-2021
3180	2020-10-16	F	Cross Country								Lower Extremity	2020-2021
3315	2021-11-18	F	Cross Country	Left Lumbar	"#. General lower back pain due to muscular tightness. L hip upslip. HS and piriformis tightness. Neuro WNL. ruled out disc and facet injury."						Trunk	2021-2022
3302	2021-06-25	M	Cross Country	Right Lower Leg Foot			plantar fasciitis and ATFL sprain				Lower Extremity	2020-2021
3333	2021-06-16	F	Cross Country		plantar fasciitis vs calf tighness		plantar fasciitis vs calf tighness				Lower Extremity	2020-2021
3354	2021-04-28	M	Cross Country								Miscellaneous	2020-2021
3354	2021-04-27	M	Cross Country		Hamstring strain vs. rupture.		Hamstring strain				Lower Extremity	2020-2021
3359	2021-04-14	M	Cross Country	Left Posterior Lower Leg Foot							Lower Extremity	2020-2021
3354	2021-01-22	M	Cross Country				IT band tightness				Lower Extremity	2020-2021
3302	2020-11-11	M	Cross Country		Hamstring and TFL tightness		Upper leg musculature tightness				Lower Extremity	2020-2021
210	2012-10-02	M	Fencing	Knee					L	Knee Pain	Lower Extremity	2012-2013
237	2012-10-08	F	Fencing	Knee	Needs consistent weekly care to reduce pain and injury prevalence.				R	Meniscal injury/tear	Lower Extremity	2012-2013
277	2012-10-15	F	Fencing	Knee					L	Patella Femoral Pain Syndrome	Lower Extremity	2012-2013
316	2012-10-23	F	Fencing	Hamstring				Acute	R	Tendinitis	Lower Extremity	2012-2013
319	2012-10-23	F	Fencing	Lower Leg				Acute	L	Pain	Lower Extremity	2012-2013
361	2012-11-02	F	Fencing	Ankle					L	Sprain	Lower Extremity	2012-2013
402	2012-11-14	F	Fencing	Knee					B	Pain	Lower Extremity	2012-2013
361	2012-11-17	F	Fencing	Thigh					R	Strain	Trunk	2012-2013
422	2012-11-19	F	Fencing	Hip					R	Strain	Lower Extremity	2012-2013
432	2012-11-27	M	Fencing	Finger				Acute	R	Fracture	Upper Extremity	2012-2013
237	2012-11-27	F	Fencing	Back	Needs consistent weekly care to reduce pain and injury prevalence.				L	Pain	Trunk	2012-2013
438	2012-11-29	M	Fencing	Toe					L	Strain	Lower Extremity	2012-2013
422	2012-12-01	F	Fencing	Head				Acute	N	Concussion	Head	2012-2013
361	2012-12-07	F	Fencing	Unspecified				Acute	N		Miscellaneous	2012-2013
361	2012-12-07	F	Fencing	Arm				Acute	R	Nerve	Upper Extremity	2012-2013
361	2013-01-18	F	Fencing	Knee					R	Tendinitis	Lower Extremity	2012-2013
517	2013-01-21	M	Fencing	Hamstring				Sub-Acute	L	Strain	Lower Extremity	2012-2013
572	2013-02-07	M	Fencing	Ankle				Acute	L	Sprain	Lower Extremity	2012-2013
598	2013-02-21	M	Fencing	Ankle					R	Impingement	Lower Extremity	2012-2013
626	2013-03-06	M	Fencing	Foot				Acute	L	Plantar Fascitis	Lower Extremity	2012-2013
628	2013-03-06	M	Fencing	Foot				Acute	N	Sprain	Lower Extremity	2012-2013
686	2013-04-30	F	Fencing	Knee					B	Joint	Lower Extremity	2012-2013
517	2013-05-01	M	Fencing	Shoulder					L	Strain	Upper Extremity	2012-2013
695	2013-05-07	M	Fencing	Patella					R	Patella Femoral Pain Syndrome	Lower Extremity	2012-2013
361	2013-06-06	F	Fencing	Shoulder				Sub-Acute	L	Strain	Upper Extremity	2012-2013
781	2013-10-07	M	Fencing	Ankle					L	Sprain	Lower Extremity	2013-2014
686	2013-10-28	F	Fencing	Ankle					R	Sprain/Strain	Lower Extremity	2013-2014
839	2013-11-06	M	Fencing	Knee					R	Patella Femoral Pain Syndrome	Lower Extremity	2013-2014
839	2013-11-09	M	Fencing	Ankle					L	Sprain/Strain	Lower Extremity	2013-2014
854	2013-11-13	F	Fencing	Knee					R	Inflammation	Lower Extremity	2013-2014
402	2013-11-15	F	Fencing	Knee					R		Lower Extremity	2013-2014
888	2014-01-07	M	Fencing	Wrist					L	Sprains / Strains	Upper Extremity	2013-2014
316	2014-01-15	F	Fencing	Hip					L	Strain	Lower Extremity	2013-2014
517	2014-01-23	M	Fencing	Foot / Ankle					R	Unclassified	Lower Extremity	2013-2014
781	2014-01-24	M	Fencing	Wrist				Acute	L	Unclassified	Upper Extremity	2013-2014
936	2014-01-30	M	Fencing	Back					R		Trunk	2013-2014
888	2014-02-17	M	Fencing	Ankle / foot					R	Pain	Lower Extremity	2013-2014
1056	2014-09-01	M	Fencing	Back					L	Strain	Trunk	2014-2015
1098	2014-10-06	F	Fencing	Cervical Spine					B	Instability	Spine	2014-2015
1102	2014-10-07	F	Fencing	Hip					L	Pain	Lower Extremity	2014-2015
572	2014-10-09	M	Fencing	Wrist					R	Sprain	Upper Extremity	2014-2015
626	2014-10-15	M	Fencing	Foot					R	Bruise	Lower Extremity	2014-2015
936	2014-10-20	M	Fencing	Hip					R	Strain	Lower Extremity	2014-2015
1156	2014-10-20	F	Fencing	Toe					R		Lower Extremity	2014-2015
572	2014-10-29	M	Fencing	Knee					B	Infra Patella Tendon	Lower Extremity	2014-2015
888	2014-11-04	M	Fencing	Toes					L	Strain	Lower Extremity	2014-2015
1208	2014-11-18	M	Fencing	Back				Acute	B	"Strain (Muscle. tendon)"	Trunk	2014-2015
277	2014-12-02	F	Fencing	Shoulder					L	Instability	Upper Extremity	2014-2015
1226	2014-12-05	M	Fencing	Nervous/Musculoskeletal					L	Nerve	Miscellaneous	2014-2015
1102	2015-01-06	F	Fencing	Ankle				Acute	R	Sprain	Lower Extremity	2014-2015
888	2015-01-08	M	Fencing	Head					N	Concussion	Head	2014-2015
277	2015-02-01	F	Fencing	Head					N	Concussion	Head	2014-2015
1267	2015-02-02	F	Fencing	Lower Back					R	Muscular Imbalance	Trunk	2014-2015
1279	2015-02-09	F	Fencing	Ankle					L	Strain	Lower Extremity	2014-2015
1281	2015-02-10	F	Fencing	Patella					R	Tendon	Lower Extremity	2014-2015
1098	2015-02-18	F	Fencing	Knee				Acute	L	Sprain	Lower Extremity	2014-2015
626	2015-02-19	M	Fencing	Thumb					R	Sprain	Upper Extremity	2014-2015
1300	2015-02-19	M	Fencing	Knee					L	bursitis	Lower Extremity	2014-2015
936	2015-02-20	M	Fencing	Thoracic spine				Chronic	B	Spasm	Spine	2014-2015
1305	2015-02-24	M	Fencing	Shoulder				Acute	R	Subluxation / Dislocation	Upper Extremity	2014-2015
1314	2015-03-03	F	Fencing	Shins					B	Pain	Lower Extremity	2014-2015
1102	2015-03-16	F	Fencing	Hip					B	Muscular Imbalance	Lower Extremity	2014-2015
316	2015-03-30	F	Fencing	Finger				Chronic	R	Tendon	Upper Extremity	2014-2015
1267	2015-04-03	F	Fencing	Head					N	Concussion	Head	2014-2015
1098	2015-04-17	F	Fencing	Shoulder					R		Upper Extremity	2014-2015
277	2015-05-05	F	Fencing	Ankle					R		Lower Extremity	2014-2015
1102	2015-06-10	F	Fencing	Neck				Acute	R	Strain	Head	2014-2015
1416	2015-09-24	F	Fencing	Back					N	"Fracture (Acute. avulsion. stress)"	Trunk	2015-2016
1424	2015-09-29	F	Fencing	Ankle					R	Bruise	Lower Extremity	2015-2016
1431	2015-09-30	M	Fencing	Thumb					R	Sprain	Upper Extremity	2015-2016
1435	2015-10-02	M	Fencing	Back				Chronic	W	Unclassified	Trunk	2015-2016
1281	2015-10-12	F	Fencing	Knee				Chronic	L	Tendonitis	Lower Extremity	2015-2016
1478	2015-10-15	F	Fencing	Knee					R	Pain	Lower Extremity	2015-2016
1500	2015-10-22	F	Fencing	Foot					R	Strain	Lower Extremity	2015-2016
1511	2015-10-25	F	Fencing	Hip					R		Lower Extremity	2015-2016
1156	2015-10-28	F	Fencing	Piriformis				Acute	R	Pain	Trunk	2015-2016
626	2015-11-05	M	Fencing	Head				Chronic	N	Concussion	Head	2015-2016
1431	2015-11-20	M	Fencing	Knee					R	Patellofemoral Disorder	Lower Extremity	2015-2016
1511	2015-12-14	F	Fencing	Knee					B	Tendinitis	Lower Extremity	2015-2016
1511	2016-01-13	F	Fencing	Back				Acute	R	Spasm	Trunk	2015-2016
1602	2016-01-20	M	Fencing	Leg					B	stress reaction	Lower Extremity	2015-2016
1611	2016-01-22	M	Fencing	Wrist					R	Strain	Upper Extremity	2015-2016
1611	2016-01-22	M	Fencing	Achiles tendon					L	Tendonitis	Lower Extremity	2015-2016
1615	2016-01-23	F	Fencing	Knee					R	Tendonitis	Lower Extremity	2015-2016
1623	2016-01-27	F	Fencing	Bicep	"PRACTICE: no fencing; footwork. conditioning. lower body and core work ok. WEIGHTS: lower body and core ok; No upper body ATR: coming in 2x/week."				R	Tendonitis	Upper Extremity	2015-2016
1643	2016-02-03	M	Fencing	Knee					R	Tendonitis	Lower Extremity	2015-2016
936	2016-04-14	M	Fencing	Lower Limb					L	Muscular Imbalance	Lower Extremity	2015-2016
1478	2016-05-10	F	Fencing	Thumb					R	Strain	Upper Extremity	2015-2016
1102	2016-06-01	F	Fencing	Thigh					R	Strain	Trunk	2015-2016
1500	2016-08-18	F	Fencing	Thumb					L	Contusion	Upper Extremity	2016-2017
1500	2016-08-19	F	Fencing	Ankle					L	Bruise	Lower Extremity	2016-2017
1770	2016-09-28	M	Fencing	General medicine					N		Miscellaneous	2016-2017
1804	2016-10-10	F	Fencing	Hamstring					L	Strain	Lower Extremity	2016-2017
1815	2016-10-15	F	Fencing	Shoulder					R		Upper Extremity	2016-2017
1770	2016-10-16	M	Fencing	Knee					R	Patella Femoral Pain Syndrome	Lower Extremity	2016-2017
1314	2016-10-17	F	Fencing	Thigh					R	"Strain (Muscle. tendon)"	Trunk	2016-2017
1602	2016-10-21	M	Fencing	Lower Back					B	Muscular Imbalance	Trunk	2016-2017
1615	2016-10-24	F	Fencing	Foot					L	Strain	Lower Extremity	2016-2017
1267	2016-10-25	F	Fencing	Shoulder					B	Muscular Imbalance	Upper Extremity	2016-2017
1827	2016-10-25	M	Fencing	Knee					B	Tendonitis	Lower Extremity	2016-2017
1431	2016-10-25	M	Fencing	Shins					B		Lower Extremity	2016-2017
1829	2016-10-25	M	Fencing	Hamstring					R	Strain	Lower Extremity	2016-2017
1827	2016-11-02	M	Fencing	Ankle					R	Pain	Lower Extremity	2016-2017
1854	2016-11-05	F	Fencing	Head					N	Concussion	Head	2016-2017
1416	2016-11-11	F	Fencing	Wrist					R	Strain	Upper Extremity	2016-2017
1416	2016-11-11	F	Fencing	Knee					L	Sprain	Lower Extremity	2016-2017
1267	2016-11-22	F	Fencing	Hip					R	"Strain (Muscle. tendon)"	Lower Extremity	2016-2017
1934	2017-01-20	M	Fencing	Ankle					L		Lower Extremity	2016-2017
1854	2017-01-27	F	Fencing	Hip					L	Strain	Lower Extremity	2016-2017
1946	2017-01-27	F	Fencing	Finger					R	Inflammation	Upper Extremity	2016-2017
1208	2017-01-27	M	Fencing	Arm					L		Upper Extremity	2016-2017
1950	2017-01-31	F	Fencing	Hip					L	Pain	Lower Extremity	2016-2017
888	2017-02-14	M	Fencing	Wrist					R	Sprain	Upper Extremity	2016-2017
[truncated: 4,291 more rows]
