# Supplementary material for: Injury and Illness in Non-Football Collegiate Athletics: a Single University, 8-Year Retrospective Analysis
Source: Research Square preprint supplement (doi:10.21203/rs.3.rs-7652417/v1), 2025-10-30
Supplement: Supplementary file 2 [file TotalCount.xlsx]

## Sheet: CountMens
Player Count	2012-2013	2013-2014	2014-2015	2015-2016	2016-2017	2017-2018	2018-2019	2019-2020	2020-2021	2021-2022
M Baseball	34	36	36	40	39	35	35	37	41	39
M Basketball	14	12	14	15	15	15	16	18	16	16
M Cross Country	17	18	15	17	16	15	14	16	13	17
M Fencing	12	15	17	19	18	22	20	19	20	16
M Golf	10	9	8	10	7	10	10	11	11	11
M Crew	35	38	44	45	47	48	41	38	30	27
M Soccer	25	25	27	28	29	27	30	28	22	29
M Swimming/Diving	30	28	30	31	27	23	24	25	25	20
M Tennis	15	15	15	13	14	13	10	11	12	12
M Track and Field	49	66	48	45	50	48	43	51	43	43
M Volleyball	23	21	20	21	22	23	21	21	20	21
M Water Polo	29	22	27	25	27	27	29	28	26	30
F Baseball	20	17	17	22	17	19	18	22	21	18
F Basketball	15	18	18	14	18	14	13	13	14	14
F Cross Country	18	20	16	15	12	17	14	14	17	18
F Fencing	16	14	15	25	18	21	19	17	17	18
F Crew	47	45	43	44	42	41	43	38	32	47
F Soccer	27	28	27	31	30	29	30	29	28	27
F Swimming/Diving	25	29	31	29	33	37	25	24	25	21
F Tennis	15	11	10	13	15	13	8	11	12	15
F Track and Field	54	72	49	50	44	44	43	47	47	41
F Volleyball	15	16	14	13	17	16	18	16	18	19
F Water Polo	17	23	18	24	19	20	23	22	22	27
