# Supplementary material for: Injury and Illness in Non-Football Collegiate Athletics: a Single University, 8-Year Retrospective Analysis
Source: Research Square preprint supplement (doi:10.21203/rs.3.rs-7652417/v1), 2025-10-30
Supplement: Supplementary file 3 [file Diving_Hrs.xlsx]

## Sheet: dive_2022_hours
Week	Workout/Conditioning	Practice	Game	Total Hours
17	1	9	0	10	2022-01-03
18	1	7	9	17	2022-01-10
19	1	9	0	10	2022-01-17
20	2	10	0	12	2022-01-24
21	2	7	0	9	2022-01-31
22	2	13	0	15	2022-02-07
23	1	3	0	4	2022-02-14
24	3	0	0	3	2022-02-21
25	3	0	0	3	2022-02-28
26	0	0	0	0	2022-03-07
27	0	0	0	0	2022-03-14
28	0	0	0	0	2022-03-21
29	0	0	0	0	2022-03-28
30	8	0	0	8	2022-04-04
31	8	0	0	8	2022-04-11
32	8	0	0	8	2022-04-18
33	8	0	0	8	2022-04-25
34	5.5	6	0	11.5	2022-05-02
35	2	16	0	18	2022-05-09
36	8	0	0	8	2022-05-16
37	8	0	0	8	2022-05-23
38	0	0	0	0	2022-05-30
39	0	0	0	0	2022-06-06
40	0	0	0	0	2022-06-13
41	0	0	0	0	2022-06-20
42	0	0	0	0	2022-06-27
43	0	0	0	0	2022-07-04
44	0	0	0	0	2022-07-11
45	0	0	0	0	2022-07-18
46	0	0	0	0	2022-07-25
47	0	0	0	0	2022-08-01
48	0	0	0	0	2022-08-08
49	0	0	0	0	2022-08-15
50	0	0	0	0	2022-08-22
51	0	0	0	0	2022-08-29
52	0	0	0	0	2022-09-05
1	5	8	0	13	2022-09-12
2	4	4	0	8	2022-09-19
3	2	13	0	15	2022-09-26
4	2	13	0	15	2022-10-03
5	2	9	3	14	2022-10-10
6	2	10	0	12	2022-10-17
7	2	12	0	14	2022-10-24
8	1	8	3	12	2022-10-31
9	1	10	0	11	2022-11-07
10	2	13	0	15	2022-11-14
11	0	0	0	0	2022-11-21
12	2	13	0	15	2022-11-28
13	2	13	0	15	2022-12-05
14	0	19	0	19	2022-12-12
15	0	0	0	0	2022-12-19
16	0	7	0	7	2022-12-26
