# Supplementary material for: Injury and Illness in Non-Football Collegiate Athletics: a Single University, 8-Year Retrospective Analysis
Source: Research Square preprint supplement (doi:10.21203/rs.3.rs-7652417/v1), 2025-10-30
Supplement: Supplementary file 4 [file M_Baseball_Hrs.xlsx]

## Sheet: hours - mba_2022_hours
Week	Workout/Conditioning	Practice	Game	Total Hours
17	4	4	0	8	2022-01-03
18	3	4	0	7	2022-01-10
19	2	3	0	5	2022-01-17
20	3	9.5	0	12.5	2022-01-24
21	3	16.5	0	19.5	2022-01-31
22	3	19.5	0	22.5	2022-02-07
23	3	8.5	9	20.5	2022-02-14
24	1	5	12	18	2022-02-21
25	0	5	12	17	2022-02-28
26	0	5	8	13	2022-03-07
27	2	7.5	6	15.5	2022-03-14
28	0	2.5	15	17.5	2022-03-21
29	0	5	12	17	2022-03-28
30	0	5	12	17	2022-04-04
31	0	5	9	14	2022-04-11
32	0	7.5	12	19.5	2022-04-18
33	1	7.5	9	17.5	2022-04-25
34	0	5	12	17	2022-05-02
35	0	5	15	20	2022-05-09
36	1	2.5	9	12.5	2022-05-16
37	1	5	9	15	2022-05-23
38	0	0	0	0	2022-05-30
39	0	0	0	0	2022-06-06
40	0	0	0	0	2022-06-13
41	0	0	0	0	2022-06-20
42	0	0	0	0	2022-06-27
43	0	0	0	0	2022-07-04
44	0	0	0	0	2022-07-11
45	0	0	0	0	2022-07-18
46	0	0	0	0	2022-07-25
47	0	0	0	0	2022-08-01
48	0	0	0	0	2022-08-08
49	0	0	0	0	2022-08-15
50	0	0	0	0	2022-08-22
51	0	0	0	0	2022-08-29
52	0	0	0	0	2022-09-05
1	5	11	0	16	2022-09-12
2	6	16.5	0	22.5	2022-09-19
3	6	7.5	0	13.5	2022-09-26
4	6	15.5	0	21.5	2022-10-03
5	6	16	0	22	2022-10-10
6	6	16	0	22	2022-10-17
7	6	12	3	21	2022-10-24
8	6	12	3	21	2022-10-31
9	6	16.5	0	22.5	2022-11-07
10	6	4	0	10	2022-11-14
11	0	0	0	0	2022-11-21
12	0	0	0	0	2022-11-28
13	0	0	0	0	2022-12-05
14	0	0	0	0	2022-12-12
15	0	0	0	0	2022-12-19
16	0	0	0	0	2022-12-26
