# Supplementary material for: Injury and Illness in Non-Football Collegiate Athletics: a Single University, 8-Year Retrospective Analysis
Source: Research Square preprint supplement (doi:10.21203/rs.3.rs-7652417/v1), 2025-10-30
Supplement: Supplementary file 5 [file M_Basketball_Hrs.xlsx]

## Sheet: hours - mbb_2022_hours
Week	Workout/Conditioning	Practice	Game	Total Hours
24	2	9	6	17	2022-01-03
25	1	7.5	3	11.5	2022-01-10
26	3	10	6	19	2022-01-17
27	2.5	9	6	17.5	2022-01-24
28	2	10	6	18	2022-01-31
29	3	12.5	3	18.5	2022-02-07
30	3	9	6	18	2022-02-14
31	3	9	6	18	2022-02-21
32	1	9	6	16	2022-02-28
33	0	0	0	0	2022-03-07
34	0	0	0	0	2022-03-14
35	0	0	0	0	2022-03-21
36	4	3	0	7	2022-03-28
37	4	5.5	0	9.5	2022-04-04
38	4	5.5	0	9.5	2022-04-11
39	4	5	0	9	2022-04-18
40	2.5	5.5	0	8	2022-04-25
41	4	5.5	0	9.5	2022-05-02
42	3.5	5.5	0	9	2022-05-09
43	0	0	0	0	2022-05-16
44	0	0	0	0	2022-05-23
45	0	0	0	0	2022-05-30
46	0	0	0	0	2022-06-06
47	4	5.5	0	9.5	2022-06-13
48	3	5	0	8	2022-06-20
49	2.5	5.5	0	8	2022-06-27
50	0	0	0	0	2022-07-04
51	0	0	0	0	2022-07-11
52	0	0	0	0	2022-07-18
1	3.5	2.5	0	6	2022-07-25
2	4	4	0	8	2022-08-01
3	4.5	4	0	8.5	2022-08-08
4	4	4	0	8	2022-08-15
5	3.5	4	0	7.5	2022-08-22
6	4	4.5	0	8.5	2022-08-29
7	2.5	4	0	6.5	2022-09-05
8	6	8	0	14	2022-09-12
9	4	5	0	9	2022-09-19
10	2	10.5	0	12.5	2022-09-26
11	3	13	0	16	2022-10-03
12	4.5	13.5	0	18	2022-10-10
13	4.5	13.5	0	18	2022-10-17
14	2.5	12.5	0	15	2022-10-24
15	3.5	12	3	18.5	2022-10-31
16	1	9	6	16	2022-11-07
17	2	7.5	6	15.5	2022-11-14
18	2	5.5	6	13.5	2022-11-21
19	2	12.5	3	17.5	2022-11-28
20	1	11.5	3	15.5	2022-12-05
21	1	7	6	14	2022-12-12
22	1	4.5	3	8.5	2022-12-19
23	2	8.5	6	16.5	2022-12-26
