# Supplementary material for: Injury and Illness in Non-Football Collegiate Athletics: a Single University, 8-Year Retrospective Analysis
Source: Research Square preprint supplement (doi:10.21203/rs.3.rs-7652417/v1), 2025-10-30
Supplement: Supplementary file 7 [file M_Cross Country_Hrs.xlsx]

## Sheet: cc_2022_hours
Week	Workout/Conditioning	Practice	Game	Total Hours
21	0	0	0	0	2022-01-03
22	0	0	0	0	2022-01-10
23	0	0	0	0	2022-01-17
24	0	0	0	0	2022-01-24
25	0	0	0	0	2022-01-31
26	0	0	0	0	2022-02-07
27	0	0	0	0	2022-02-14
28	0	0	0	0	2022-02-21
29	0	0	0	0	2022-02-28
30	0	0	0	0	2022-03-07
31	0	0	0	0	2022-03-14
32	0	0	0	0	2022-03-21
33	0	0	0	0	2022-03-28
34	0	0	0	0	2022-04-04
35	0	0	0	0	2022-04-11
36	0	0	0	0	2022-04-18
37	0	0	0	0	2022-04-25
38	0	0	0	0	2022-05-02
39	0	0	0	0	2022-05-09
40	0	0	0	0	2022-05-16
41	0	0	0	0	2022-05-23
42	0	0	0	0	2022-05-30
43	0	0	0	0	2022-06-06
44	0	0	0	0	2022-06-13
45	0	0	0	0	2022-06-20
46	0	0	0	0	2022-06-27
47	0	0	0	0	2022-07-04
48	0	0	0	0	2022-07-11
49	0	0	0	0	2022-07-18
50	0	0	0	0	2022-07-25
51	0	0	0	0	2022-08-01
52	0	0	0	0	2022-08-08
1	2	17.5	0	19.5	2022-08-15
2	2	13	0	15	2022-08-22
3	1	12	3	16	2022-08-29
4	1	9.5	3	13.5	2022-09-05
5	3	16	0	19	2022-09-12
6	2	14.5	3	19.5	2022-09-19
7	2	12	0	14	2022-09-26
8	2	13	0	15	2022-10-03
9	2	14.5	6	22.5	2022-10-10
10	2	15.5	0	17.5	2022-10-17
11	2	12.5	0	14.5	2022-10-24
12	2.5	2	0	4.5	2022-10-31
13	4.5	0	0	4.5	2022-11-07
14	0	0	0	0	2022-11-14
15	0	0	0	0	2022-11-21
16	0	0	0	0	2022-11-28
17	0	0	0	0	2022-12-05
18	0	0	0	0	2022-12-12
19	0	0	0	0	2022-12-19
20	0	0	0	0	2022-12-26
