# Supplementary material for: Injury and Illness in Non-Football Collegiate Athletics: a Single University, 8-Year Retrospective Analysis
Source: Research Square preprint supplement (doi:10.21203/rs.3.rs-7652417/v1), 2025-10-30
Supplement: Supplementary file 8 [file M_Fencing_Hrs.xlsx]

## Sheet: fen_2022_hours
Week	Workout/Conditioning	Practice	Game	Total Hours
16	5	12.5	0	17.5	2022-01-03
17	5	12.5	0	17.5	2022-01-10
18	4	7.5	0	11.5	2022-01-17
19	5	12.5	0	17.5	2022-01-24
20	5	10	9	24	2022-01-31
21	5	10	0	15	2022-02-07
22	5	12.5	0	17.5	2022-02-14
23	5	12.5	0	17.5	2022-02-21
24	5	12.5	0	17.5	2022-02-28
25	5	10	6	21	2022-03-07
26	4	2.5	0	6.5	2022-03-14
27	0	5	18	23	2022-03-21
28	0	0	0	0	2022-03-28
29	0	0	0	0	2022-04-04
30	0	4	0	4	2022-04-11
31	0	4	0	4	2022-04-18
32	0	4	0	4	2022-04-25
33	0	4	0	4	2022-05-02
34	0	4	0	4	2022-05-09
35	0	4	3	7	2022-05-16
36	0	0	0	0	2022-05-23
37	0	0	0	0	2022-05-30
38	0	0	0	0	2022-06-06
39	0	0	0	0	2022-06-13
40	0	0	0	0	2022-06-20
41	0	0	0	0	2022-06-27
42	0	0	0	0	2022-07-04
43	0	0	0	0	2022-07-11
44	0	0	0	0	2022-07-18
45	0	0	0	0	2022-07-25
46	0	0	0	0	2022-08-01
47	0	0	0	0	2022-08-08
48	0	0	0	0	2022-08-15
49	0	0	0	0	2022-08-22
50	0	0	0	0	2022-08-29
51	0	0	0	0	2022-09-05
52	0	0	0	0	2022-09-12
1	2	3	0	5	2022-09-19
2	5	4	0	9	2022-09-26
3	5	12.5	0	17.5	2022-10-03
4	5	12.5	0	17.5	2022-10-10
5	5	12.5	0	17.5	2022-10-17
6	5	12.5	0	17.5	2022-10-24
7	3	10	6	19	2022-10-31
8	2	7.5	6	15.5	2022-11-07
9	4	10	0	14	2022-11-14
10	2	4.5	0	6.5	2022-11-21
11	3	10	6	19	2022-11-28
12	0	0	0	0	2022-12-05
13	0	0	0	0	2022-12-12
14	0	0	0	0	2022-12-19
15	0	0	0	0	2022-12-26
