# Supplementary material for: Injury and Illness in Non-Football Collegiate Athletics: a Single University, 8-Year Retrospective Analysis
Source: Research Square preprint supplement (doi:10.21203/rs.3.rs-7652417/v1), 2025-10-30
Supplement: Supplementary file 9 [file M_Golf_Hrs.xlsx]

## Sheet: mgo_2022_hours
Week	Workout/Conditioning	Practice	Game	Total Hours
18	3	16	0	19	2022-01-03
19	3	16	0	19	2022-01-10
20	3	16	0	19	2022-01-17
21	3	16	0	19	2022-01-24
22	3	12	0	15	2022-01-31
23	2	2	12	16	2022-02-07
24	3	12	0	15	2022-02-14
25	2	4	6	12	2022-02-21
26	2	6	0	8	2022-02-28
27	3	8	0	11	2022-03-07
28	0	4	0	4	2022-03-14
29	0	0	12	12	2022-03-21
30	0	0	0	0	2022-03-28
31	0	0	6	6	2022-04-04
32	0	0	6	6	2022-04-11
33	0	0	9	9	2022-04-18
34	0	0	0	0	2022-04-25
35	0	0	0	0	2022-05-02
36	0	0	0	0	2022-05-09
37	0	0	0	0	2022-05-16
38	0	0	0	0	2022-05-23
39	0	0	0	0	2022-05-30
40	0	0	0	0	2022-06-06
41	0	0	0	0	2022-06-13
42	0	0	0	0	2022-06-20
43	0	0	0	0	2022-06-27
44	0	0	0	0	2022-07-04
45	0	0	0	0	2022-07-11
46	0	0	0	0	2022-07-18
47	0	0	0	0	2022-07-25
48	0	0	0	0	2022-08-01
49	0	0	0	0	2022-08-08
50	0	0	0	0	2022-08-15
51	0	0	0	0	2022-08-22
52	0	0	0	0	2022-08-29
1	0	3	0	3	2022-09-05
2	1	13	0	14	2022-09-12
3	2	9	12	23	2022-09-19
4	2	10	12	24	2022-09-26
5	3	18	0	21	2022-10-03
6	2	4	12	18	2022-10-10
7	3	7	0	10	2022-10-17
8	3	4	12	19	2022-10-24
9	3	4	0	7	2022-10-31
10	3	4	0	7	2022-11-07
11	3	2	0	5	2022-11-14
12	0	0	0	0	2022-11-21
13	0	0	0	0	2022-11-28
14	0	0	0	0	2022-12-05
15	0	0	0	0	2022-12-12
16	0	0	0	0	2022-12-19
17	0	0	0	0	2022-12-26
