# Supplementary material for: Injury and Illness in Non-Football Collegiate Athletics: a Single University, 8-Year Retrospective Analysis
Source: Research Square preprint supplement (doi:10.21203/rs.3.rs-7652417/v1), 2025-10-30
Supplement: Supplementary file 10 [file M_Soccer_Hrs.xlsx]

## Sheet: mso_2022_hours
Week	Workout/Conditioning	Practice	Game	Total Hours
1	0	0	0	0	2022-01-03
2	0	0	0	0	2022-01-10
3	0	0	0	0	2022-01-17
4	4	4	0	8	2022-01-24
5	4	4	0	8	2022-01-31
6	4	4	0	8	2022-02-07
7	3.5	4	0	7.5	2022-02-14
8	2.5	4	0	6.5	2022-02-21
9	4	4.5	0	8.5	2022-02-28
10	2.5	2	3	7.5	2022-03-07
11	0	0	0	0	2022-03-14
12	0	0	0	0	2022-03-21
13	3	6	0	9	2022-03-28
14	3	6	4	13	2022-04-04
15	3	6	2	11	2022-04-11
16	3	6	2	11	2022-04-18
17	3	6	0	9	2022-04-25
18	3	6	2	11	2022-05-02
19	3	4	0	7	2022-05-09
20	3	4	0	7	2022-05-16
21	3	4	0	7	2022-05-23
22	0	0	0	0	2022-05-30
23	0	0	0	0	2022-06-06
24	0	0	0	0	2022-06-13
25	0	0	0	0	2022-06-20
26	0	0	0	0	2022-06-27
27	0	0	0	0	2022-07-04
28	0	0	0	0	2022-07-11
29	0	0	0	0	2022-07-18
30	0	0	0	0	2022-07-25
31	0	0	0	0	2022-08-01
32	0	20	3	23	2022-08-08
33	0	8.5	6	14.5	2022-08-15
34	0	12	12	24	2022-08-22
35	0	11.5	3	14.5	2022-08-29
36	0	6.5	6	12.5	2022-09-05
37	0	10.5	3	13.5	2022-09-12
38	0	10	3	13	2022-09-19
39	0	8	6	14	2022-09-26
40	0	8	6	14	2022-10-03
41	0	8	6	14	2022-10-10
42	0	8	6	14	2022-10-17
43	0	11.5	3	14.5	2022-10-24
44	0	0	0	0	2022-10-31
45	0	0	0	0	2022-11-07
46	1.5	4	0	5.5	2022-11-14
47	0	0	0	0	2022-11-21
48	0	0	0	0	2022-11-28
49	0	0	0	0	2022-12-05
50	0	0	0	0	2022-12-12
51	0	0	0	0	2022-12-19
52	0	0	0	0	2022-12-26
