# Supplementary material for: Injury and Illness in Non-Football Collegiate Athletics: a Single University, 8-Year Retrospective Analysis
Source: Research Square preprint supplement (doi:10.21203/rs.3.rs-7652417/v1), 2025-10-30
Supplement: Supplementary file 12 [file M_Tennis_Hrs.xlsx]

## Sheet: mte_2022_hours
Week	Workout/Conditioning	Practice	Game	Total Hours
16	0	0	0	0	2022-01-03
17	2.5	11	0	13.5	2022-01-10
18	1.5	16.5	6	24	2022-01-17
19	1.5	16.5	3	21	2022-01-24
20	2.5	16.5	0	19	2022-01-31
21	1.5	11	6	18.5	2022-02-07
22	1.5	14	0	15.5	2022-02-14
23	1	11	6	18	2022-02-21
24	1.5	10.5	0	12	2022-02-28
25	1	3	15	19	2022-03-07
26	1	2	9	12	2022-03-14
27	0	2	3	5	2022-03-21
28	0	2	15	17	2022-03-28
29	1	3	9	13	2022-04-04
30	1	6	9	16	2022-04-11
31	1.5	10	0	11.5	2022-04-18
32	1	5	7	13	2022-04-25
33	0	0	0	0	2022-05-02
34	7.5	0	0	7.5	2022-05-09
35	7.5	0	0	7.5	2022-05-16
36	7.5	0	0	7.5	2022-05-23
37	7.5	0	0	7.5	2022-05-30
38	0	0	0	0	2022-06-06
39	0	0	0	0	2022-06-13
40	0	0	0	0	2022-06-20
41	0	0	0	0	2022-06-27
42	0	0	0	0	2022-07-04
43	0	0	0	0	2022-07-11
44	0	0	0	0	2022-07-18
45	0	0	0	0	2022-07-25
46	0	0	0	0	2022-08-01
47	0	0	0	0	2022-08-08
48	0	0	0	0	2022-08-15
49	0	0	0	0	2022-08-22
50	0	0	0	0	2022-08-29
51	0	0	0	0	2022-09-05
52	0	0	0	0	2022-09-12
1	0	0	0	0	2022-09-19
2	0	3	6	9	2022-09-26
3	2	9	6	17	2022-10-03
4	2	11.5	0	13.5	2022-10-10
5	2	11.5	9	22.5	2022-10-17
6	2	11.5	9	22.5	2022-10-24
7	2	11.5	0	13.5	2022-10-31
8	1	7	9	17	2022-11-07
9	1	7	0	8	2022-11-14
10	2	4	0	6	2022-11-21
11	0	0	0	0	2022-11-28
12	0	0	0	0	2022-12-05
13	0	0	0	0	2022-12-12
14	0	0	0	0	2022-12-19
15	0	0	0	0	2022-12-26
