# Supplementary material for: Injury and Illness in Non-Football Collegiate Athletics: a Single University, 8-Year Retrospective Analysis
Source: Research Square preprint supplement (doi:10.21203/rs.3.rs-7652417/v1), 2025-10-30
Supplement: Supplementary file 13 [file M_Volleyball_Hrs.xlsx]

## Sheet: Men Volleyball Hours
Week	Workout/Conditioning	Practice	Game	Total Hours
16	1.5	11	0	12.5	2022-01-03
17	2.5	10	6	18.5	2022-01-10
18	3	9.5	3	15.5	2022-01-17
19	2.5	8.5	6	17	2022-01-24
20	2.5	6	6	14.5	2022-01-31
21	2.5	4.5	9	16	2022-02-07
22	2.5	6	6	14.5	2022-02-14
23	2.5	9	3	14.5	2022-02-21
24	2.5	8.5	6	17	2022-02-28
25	1.5	4.5	3	9	2022-03-07
26	0	0	0	0	2022-03-14
27	2.5	10.5	6	19	2022-03-21
28	2.5	11	6	19.5	2022-03-28
29	2.5	10.5	6	19	2022-04-04
30	2.5	11	3	16.5	2022-04-11
31	1	5	3	9	2022-04-18
32	0	0	0	0	2022-04-25
33	3	0	0	3	2022-05-02
34	3	4.5	0	7.5	2022-05-09
35	3	4.5	0	7.5	2022-05-16
36	3	4	0	7	2022-05-23
37	0	0	0	0	2022-05-30
38	0	0	0	0	2022-06-06
39	0	0	0	0	2022-06-13
40	0	0	0	0	2022-06-20
41	0	0	0	0	2022-06-27
42	0	0	0	0	2022-07-04
43	0	0	0	0	2022-07-11
44	0	0	0	0	2022-07-18
45	0	0	0	0	2022-07-25
46	0	0	0	0	2022-08-01
47	0	0	0	0	2022-08-08
48	0	0	0	0	2022-08-15
49	0	0	0	0	2022-08-22
50	0	0	0	0	2022-08-29
51	0	0	0	0	2022-09-05
52	0	0	0	0	2022-09-12
1	6.5	4	0	10.5	2022-09-19
2	10	5	0	15	2022-09-26
3	10	16	0	26	2022-10-03
4	10	12.5	0	22.5	2022-10-10
5	10	16	0	26	2022-10-17
6	10	13.5	3	26.5	2022-10-24
7	7	11	3	21	2022-10-31
8	10	13.5	3	26.5	2022-11-07
9	10	9.5	0	19.5	2022-11-14
10	4.5	3	0	7.5	2022-11-21
11	0	0	0	0	2022-11-28
12	0	0	0	0	2022-12-05
13	0	0	0	0	2022-12-12
14	0	0	0	0	2022-12-19
15	1	11	0	12	2022-12-26
