# Supplementary material for: Injury and Illness in Non-Football Collegiate Athletics: a Single University, 8-Year Retrospective Analysis
Source: Research Square preprint supplement (doi:10.21203/rs.3.rs-7652417/v1), 2025-10-30
Supplement: Supplementary file 14 [file M_Water Polo_Hrs.xlsx]

## Sheet: hours - mwp_2022_hours
Week	Workout/Conditioning	Practice	Game	Total Hours
21	0	0	0	0	2022-01-03
22	0	0	0	0	2022-01-10
23	0	0	0	0	2022-01-17
24	7.5	3.5	0	11	2022-01-24
25	6.5	1.5	0	8	2022-01-31
26	6.5	1.5	0	8	2022-02-07
27	6.5	1.5	0	8	2022-02-14
28	5	1.5	0	6.5	2022-02-21
29	6.5	1.5	0	8	2022-02-28
30	0	0	0	0	2022-03-07
31	0	0	0	0	2022-03-14
32	0	0	0	0	2022-03-21
33	3	12.5	0	15.5	2022-03-28
34	3	12	0	15	2022-04-04
35	3	13.5	0	16.5	2022-04-11
36	3	12	3	18	2022-04-18
37	2.5	12	0	14.5	2022-04-25
38	3	12	0	15	2022-05-02
39	1	12.5	3	16.5	2022-05-09
40	2.5	8	0	10.5	2022-05-16
41	0	0	0	0	2022-05-23
42	0	0	0	0	2022-05-30
43	0	0	0	0	2022-06-06
44	0	0	0	0	2022-06-13
45	0	0	0	0	2022-06-20
46	0	0	0	0	2022-06-27
47	0	0	0	0	2022-07-04
48	0	0	0	0	2022-07-11
49	0	0	0	0	2022-07-18
50	0	0	0	0	2022-07-25
51	0	0	0	0	2022-08-01
52	0	0	0	0	2022-08-08
1	3	21	0	24	2022-08-15
2	3	22	0	25	2022-08-22
3	4	23.5	3	30.5	2022-08-29
4	2.5	9	6	17.5	2022-09-05
5	2.5	11.5	6	20	2022-09-12
6	1.5	6.5	6	14	2022-09-19
7	3	8	3	14	2022-09-26
8	1.5	14	3	18.5	2022-10-03
9	3	13.5	3	19.5	2022-10-10
10	3	13.5	3	19.5	2022-10-17
11	3	16	3	22	2022-10-24
12	1.5	8	6	15.5	2022-10-31
13	2.5	14.5	3	20	2022-11-07
14	0	9.5	3	12.5	2022-11-14
15	0	0	0	0	2022-11-21
16	0	0	0	0	2022-11-28
17	0	0	0	0	2022-12-05
18	0	0	0	0	2022-12-12
19	0	0	0	0	2022-12-19
20	0	0	0	0	2022-12-26
