# Supplementary material for: Injury and Illness in Non-Football Collegiate Athletics: a Single University, 8-Year Retrospective Analysis
Source: Research Square preprint supplement (doi:10.21203/rs.3.rs-7652417/v1), 2025-10-30
Supplement: Supplementary file 15 [file M_Water Polo_Hrs_Club.xlsx]

## Sheet: Sport_Hours_WP_men
Week	Game	Practice	xClub Hours	Workout/Conditioning	Total Hours	Date
1		4		3	7	2022-01-03
2		4		3	7	2022-01-10
3		4		3	7	2022-01-17
4		5		3	8	2022-01-24
5		5		3	8	2022-01-31
6		5		3	8	2022-02-07
7		5		3	8	2022-02-14
8		5		3	8	2022-02-21
9		5		3	8	2022-02-28
10					0	2022-03-07
11					0	2022-03-14
12					0	2022-03-21
13		13		3	16	2022-03-28
14		13		3	16	2022-04-04
15		13		3	16	2022-04-11
16		13		3	16	2022-04-18
17	2	13		3	18	2022-04-25
18		13		3	16	2022-05-02
19	4	13		3	20	2022-05-09
20		13		3	16	2022-05-16
21					0	2022-05-23
22					0	2022-05-30
23					0	2022-06-06
24					0	2022-06-13
25			8	3	11	2022-06-20
26			8	3	11	2022-06-27
27			8	3	11	2022-07-04
28			8	3	11	2022-07-11
29			8	3	11	2022-07-18
30			8	3	11	2022-07-25
31			8	3	11	2022-08-01
32			8	3	11	2022-08-08
33		12.5		3	15.5	2022-08-15
34		12.5		3	15.5	2022-08-22
35	6	11		3	20	2022-08-29
36	4.5	12.5		3	20	2022-09-05
37	3	12.5		3	18.5	2022-09-12
38	7.5	9.5		3	20	2022-09-19
39	3	12.5		3	18.5	2022-09-26
40	3	12.5		3	18.5	2022-10-03
41	1.5	12.5		3	17	2022-10-10
42	1.5	12.5		3	17	2022-10-17
43	1.5	12.5		3	17	2022-10-24
44	1.5	12.5		3	17	2022-10-31
45	3	12.5		3	18.5	2022-11-07
46	4.5	12.5		3	20	2022-11-14
47					0	2022-11-21
48					0	2022-11-28
49		4		3	7	2022-12-05
50		4		3	7	2022-12-12
51		4		3	7	2022-12-19
52		4		3	7	2022-12-26
