# Supplementary material for: Injury and Illness in Non-Football Collegiate Athletics: a Single University, 8-Year Retrospective Analysis
Source: Research Square preprint supplement (doi:10.21203/rs.3.rs-7652417/v1), 2025-10-30
Supplement: Supplementary file 16 [file W_Baseball_Hrs.xlsx]

## Sheet: hours - s_2022_hours
Week	Workout/Conditioning	Practice	Game	Total Hours
17	1.5	5.5	0	7	2022-01-03
18	2.5	22.5	0	25	2022-01-10
19	4	22	0	26	2022-01-17
20	4.5	20	0	24.5	2022-01-24
21	4.5	25	0	29.5	2022-01-31
22	3	19.5	9	31.5	2022-02-07
23	7	10.5	9	26.5	2022-02-14
24	7	9.5	9	25.5	2022-02-21
25	6	15	11	32	2022-02-28
26	4	3.5	8	15.5	2022-03-07
27	6	28	4	38	2022-03-14
28	1.5	4.5	10	16	2022-03-21
29	3.5	9.5	10	23	2022-03-28
30	4.5	15.5	7	27	2022-04-04
31	5.5	14.5	7	27	2022-04-11
32	3.5	7	10	20.5	2022-04-18
33	4.5	15	7	26.5	2022-04-25
34	2.5	18	7	27.5	2022-05-02
35	3	25.5	7	35.5	2022-05-09
36	0	8.5	6	14.5	2022-05-16
37	0	0	3	3	2022-05-23
38	0	0	0	0	2022-05-30
39	0	0	0	0	2022-06-06
40	0	0	0	0	2022-06-13
41	0	0	0	0	2022-06-20
42	0	0	0	0	2022-06-27
43	0	0	0	0	2022-07-04
44	0	0	0	0	2022-07-11
45	0	0	0	0	2022-07-18
46	0	0	0	0	2022-07-25
47	0	0	0	0	2022-08-01
48	0	0	0	0	2022-08-08
49	0	0	0	0	2022-08-15
50	0	0	0	0	2022-08-22
51	0	0	0	0	2022-08-29
52	0	0	0	0	2022-09-05
1	2	2	0	4	2022-09-12
2	5	11.5	0	16.5	2022-09-19
3	10	15.5	0	25.5	2022-09-26
4	10	15	0	25	2022-10-03
5	7.5	18.5	3	29	2022-10-10
6	10	22	0	32	2022-10-17
7	6.5	17	6	29.5	2022-10-24
8	10	19.5	0	29.5	2022-10-31
9	6	12	6	24	2022-11-07
10	7.5	16.5	0	24	2022-11-14
11	3	3.5	0	6.5	2022-11-21
12	0	0	0	0	2022-11-28
13	0	0	0	0	2022-12-05
14	0	0	0	0	2022-12-12
15	0	0	0	0	2022-12-19
16	0	0	0	0	2022-12-26
