# Supplementary material for: Injury and Illness in Non-Football Collegiate Athletics: a Single University, 8-Year Retrospective Analysis
Source: Research Square preprint supplement (doi:10.21203/rs.3.rs-7652417/v1), 2025-10-30
Supplement: Supplementary file 17 [file W_Basketball_Hrs.xlsx]

## Sheet: hours - wbb_2022_hours
Week	Workout/Conditioning	Practice	Game	Total Hours
24	2.5	10.5	6	19	2022-01-03
25	2.5	6.5	6	15	2022-01-10
26	2.5	9.5	6	18	2022-01-17
27	1	10	6	17	2022-01-24
28	2.5	10.5	6	19	2022-01-31
29	1	8.5	6	15.5	2022-02-07
30	1	2.5	6	9.5	2022-02-14
31	2.5	9.5	6	18	2022-02-21
32	2.5	9	6	17.5	2022-02-28
33	0	0	0	0	2022-03-07
34	0	0	0	0	2022-03-14
35	0	0	0	0	2022-03-21
36	2	0	0	2	2022-03-28
37	4	5	0	9	2022-04-04
38	4	6	0	10	2022-04-11
39	4	6	0	10	2022-04-18
40	3.5	6	0	9.5	2022-04-25
41	3	5	0	8	2022-05-02
42	3	6	0	9	2022-05-09
43	4	4	0	8	2022-05-16
44	1.5	3	0	4.5	2022-05-23
45	0	0	0	0	2022-05-30
46	0	0	0	0	2022-06-06
47	0	0	0	0	2022-06-13
48	0	0	0	0	2022-06-20
49	0	0	0	0	2022-06-27
50	0	0	0	0	2022-07-04
51	0	0	0	0	2022-07-11
52	0	0	0	0	2022-07-18
1	2	3	0	5	2022-07-25
2	4	6	0	10	2022-08-01
3	6	6	0	12	2022-08-08
4	4	6	0	10	2022-08-15
5	6	6	0	12	2022-08-22
6	2.5	7	0	9.5	2022-08-29
7	0	0	0	0	2022-09-05
8	4	4	0	8	2022-09-12
9	2.5	5	0	7.5	2022-09-19
10	3	12.5	0	15.5	2022-09-26
11	3	12	0	15	2022-10-03
12	3	15	0	18	2022-10-10
13	3	12	0	15	2022-10-17
14	2.5	12	3	17.5	2022-10-24
15	3	11.5	3	17.5	2022-10-31
16	2	17.5	6	25.5	2022-11-07
17	2.5	11	6	19.5	2022-11-14
18	2	13	6	21	2022-11-21
19	1	8.5	3	12.5	2022-11-28
20	2	13	0	15	2022-12-05
21	2	11.5	6	19.5	2022-12-12
22	1	4.5	0	5.5	2022-12-19
23	1.5	11.5	0	13	2022-12-26
