# Supplementary material for: Injury and Illness in Non-Football Collegiate Athletics: a Single University, 8-Year Retrospective Analysis
Source: Research Square preprint supplement (doi:10.21203/rs.3.rs-7652417/v1), 2025-10-30
Supplement: Supplementary file 18 [file W_Crew_Hrs.xlsx]

## Sheet: wcr_2022_hours
Week	Workout/Conditioning	Practice	Game	Total Hours
16	0	0	0	0	2022-01-03
17	0	0	0	0	2022-01-10
18	2.5	15	0	17.5	2022-01-17
19	2.5	15	0	17.5	2022-01-24
20	2.5	15	0	17.5	2022-01-31
21	2.5	15	0	17.5	2022-02-07
22	2.5	15	0	17.5	2022-02-14
23	4.5	15	3	22.5	2022-02-21
24	4.5	17.5	3	25	2022-02-28
25	2.5	14.5	0	17	2022-03-07
26	2.5	17.5	6	26	2022-03-14
27	2.5	14.5	6	23	2022-03-21
28	2.5	21.5	0	24	2022-03-28
29	4.5	17.5	3	25	2022-04-04
30	4.5	17.5	0	22	2022-04-11
31	4.5	24.5	0	29	2022-04-18
32	2.5	17.5	6	26	2022-04-25
33	1.5	18	0	19.5	2022-05-02
34	1.5	14.5	3	19	2022-05-09
35	0	0	0	0	2022-05-16
36	0	0	0	0	2022-05-23
37	0	0	0	0	2022-05-30
38	0	0	0	0	2022-06-06
39	0	0	0	0	2022-06-13
40	0	0	0	0	2022-06-20
41	0	0	0	0	2022-06-27
42	0	0	0	0	2022-07-04
43	0	0	0	0	2022-07-11
44	0	0	0	0	2022-07-18
45	0	0	0	0	2022-07-25
46	0	0	0	0	2022-08-01
47	0	0	0	0	2022-08-08
48	0	0	0	0	2022-08-15
49	0	0	0	0	2022-08-22
50	0	0	0	0	2022-08-29
51	0	0	0	0	2022-09-05
52	0	0	0	0	2022-09-12
1	6.5	1.5	0	8	2022-09-19
2	5	3	0	8	2022-09-26
3	5	3	0	8	2022-10-03
4	2.5	14.5	0	17	2022-10-10
5	2.5	14.5	0	17	2022-10-17
6	2.5	14.5	0	17	2022-10-24
7	1.5	10	0	11.5	2022-10-31
8	1.5	13	3	17.5	2022-11-07
9	2.5	12	0	14.5	2022-11-14
10	1	4.5	0	5.5	2022-11-21
11	2.5	8.5	0	11	2022-11-28
12	0	0	0	0	2022-12-05
13	0	0	0	0	2022-12-12
14	0	0	0	0	2022-12-19
15	0	0	0	0	2022-12-26
