# Supplementary material for: Injury and Illness in Non-Football Collegiate Athletics: a Single University, 8-Year Retrospective Analysis
Source: Research Square preprint supplement (doi:10.21203/rs.3.rs-7652417/v1), 2025-10-30
Supplement: Supplementary file 21 [file W_Soccer_Hrs.xlsx]

## Sheet: hours - wso_2022_hours
Week	Workout/Conditioning	Practice	Game	Total Hours
23	0	0	0	0	2022-01-03
24	0	0	0	0	2022-01-10
25	0	0	0	0	2022-01-17
26	3	4.5	0	7.5	2022-01-24
27	3	4.5	0	7.5	2022-01-31
28	3	4.5	0	7.5	2022-02-07
29	3	4.5	0	7.5	2022-02-14
30	2.5	6	0	8.5	2022-02-21
31	1.5	7.5	2	11	2022-02-28
32	1.5	6	2	9.5	2022-03-07
33	0	0	0	0	2022-03-14
34	0	0	0	0	2022-03-21
35	3	11.5	0	14.5	2022-03-28
36	7.5	9	2	18.5	2022-04-04
37	7.5	11.5	0	19	2022-04-11
38	7.5	11.5	2	21	2022-04-18
39	7.5	11.5	0	19	2022-04-25
40	6.5	7	4	17.5	2022-05-02
41	6	4	0	10	2022-05-09
42	5.5	4	0	9.5	2022-05-16
43	6	4	0	10	2022-05-23
44	0	0	0	0	2022-05-30
45	0	0	0	0	2022-06-06
46	0	0	0	0	2022-06-13
47	0	0	0	0	2022-06-20
48	0	0	0	0	2022-06-27
49	0	0	0	0	2022-07-04
50	0	0	0	0	2022-07-11
51	0	0	0	0	2022-07-18
52	0	0	0	0	2022-07-25
1	0	17	0	17	2022-08-01
2	0	15	3	18	2022-08-08
3	0	13	6	19	2022-08-15
4	0	10	3	13	2022-08-22
5	0	8.5	6	14.5	2022-08-29
6	0	8.5	3	11.5	2022-09-05
7	0	11	6	17	2022-09-12
8	0	8	12	20	2022-09-19
9	0	8.5	6	14.5	2022-09-26
10	0	11	0	11	2022-10-03
11	0	10	6	16	2022-10-10
12	0	8	6	14	2022-10-17
13	0	4.5	6	10.5	2022-10-24
14	0	0	0	0	2022-10-31
15	2.5	0	0	2.5	2022-11-07
16	2.5	0	0	2.5	2022-11-14
17	0	0	0	0	2022-11-21
18	0	0	0	0	2022-11-28
19	0	0	0	0	2022-12-05
20	0	0	0	0	2022-12-12
21	0	0	0	0	2022-12-19
22	0	0	0	0	2022-12-26
