# Supplementary material for: Injury and Illness in Non-Football Collegiate Athletics: a Single University, 8-Year Retrospective Analysis
Source: Research Square preprint supplement (doi:10.21203/rs.3.rs-7652417/v1), 2025-10-30
Supplement: Supplementary file 23 [file W_Tennis_Hrs.xlsx]

## Sheet: wt_2022_hours
Week	Workout/Conditioning	Practice	Game	Total Hours
16	2	12.5	0	14.5	2022-01-03
17	2	12.5	3	17.5	2022-01-10
18	1	7.5	6	14.5	2022-01-17
19	2	12.5	3	17.5	2022-01-24
20	2	10	6	18	2022-01-31
21	2	10	3	15	2022-02-07
22	2	10	6	18	2022-02-14
23	1	10	3	14	2022-02-21
24	2	12.5	3	17.5	2022-02-28
25	1	5	14	20	2022-03-07
26	0	2	3	5	2022-03-14
27	0	0	9	9	2022-03-21
28	1	5	0	6	2022-03-28
29	2	10	4	16	2022-04-04
30	2	10	3	15	2022-04-11
31	2	12.5	3	17.5	2022-04-18
32	0	0	0	0	2022-04-25
33	4.5	2.5	0	7	2022-05-02
34	4.5	2.5	0	7	2022-05-09
35	4.5	2.5	0	7	2022-05-16
36	4.5	2.5	0	7	2022-05-23
37	0	0	0	0	2022-05-30
38	0	0	0	0	2022-06-06
39	0	0	0	0	2022-06-13
40	0	0	0	0	2022-06-20
41	0	0	0	0	2022-06-27
42	0	0	0	0	2022-07-04
43	0	0	0	0	2022-07-11
44	0	0	0	0	2022-07-18
45	0	0	0	0	2022-07-25
46	0	0	0	0	2022-08-01
47	0	0	0	0	2022-08-08
48	0	0	0	0	2022-08-15
49	0	0	0	0	2022-08-22
50	0	0	0	0	2022-08-29
51	0	0	0	0	2022-09-05
52	0	0	0	0	2022-09-12
1	0	9.5	0	9.5	2022-09-19
2	2	11.5	0	13.5	2022-09-26
3	2	11.5	0	13.5	2022-10-03
4	2	11.5	0	13.5	2022-10-10
5	5	6	9	20	2022-10-17
6	1	7	3	11	2022-10-24
7	3	9	0	12	2022-10-31
8	3	6.5	9	18.5	2022-11-07
9	6	9.5	0	15.5	2022-11-14
10	5.5	4.5	0	10	2022-11-21
11	0	0	0	0	2022-11-28
12	0	0	0	0	2022-12-05
13	0	0	0	0	2022-12-12
14	0	0	0	0	2022-12-19
15	0	0	0	0	2022-12-26
