# Supplementary material for: Injury and Illness in Non-Football Collegiate Athletics: a Single University, 8-Year Retrospective Analysis
Source: Research Square preprint supplement (doi:10.21203/rs.3.rs-7652417/v1), 2025-10-30
Supplement: Supplementary file 24 [file W_Volleyball_Hrs.xlsx]

## Sheet: Womens Volleyball Hours
Week	Workout/Conditioning	Practice	Game	Total Hours
22	0	0	0	0	2022-01-03
23	0	4	0	4	2022-01-10
24	0	6.5	0	6.5	2022-01-17
25	2.5	5	0	7.5	2022-01-24
26	2.5	4	0	6.5	2022-01-31
27	2.5	2	0	4.5	2022-02-07
28	2.5	2	0	4.5	2022-02-14
29	1.5	4	0	5.5	2022-02-21
30	2.5	4	0	6.5	2022-02-28
31	0	0	0	0	2022-03-07
32	0	0	0	0	2022-03-14
33	0	0	0	0	2022-03-21
34	3	10	0	13	2022-03-28
35	3	12.5	3	18.5	2022-04-04
36	3	10	3	16	2022-04-11
37	3	11	4	18	2022-04-18
38	3	9	0	12	2022-04-25
39	3	11	0	14	2022-05-02
40	2	8.5	0	10.5	2022-05-09
41	4	0	0	4	2022-05-16
42	3	7.5	0	10.5	2022-05-23
43	0	0	0	0	2022-05-30
44	0	0	0	0	2022-06-06
45	0	0	0	0	2022-06-13
46	0	0	0	0	2022-06-20
47	0	0	0	0	2022-06-27
48	0	0	0	0	2022-07-04
49	0	0	0	0	2022-07-11
50	0	0	0	0	2022-07-18
51	0	0	0	0	2022-07-25
52	0	0	0	0	2022-08-01
1	3	21.5	0	24.5	2022-08-08
2	3.5	18	3	24.5	2022-08-15
3	2.5	11	6	19.5	2022-08-22
4	3	10.5	6	19.5	2022-08-29
5	2.5	9	6	17.5	2022-09-05
6	2	9	6	17	2022-09-12
7	2	9	6	17	2022-09-19
8	2	11.5	6	19.5	2022-09-26
9	2	9	6	17	2022-10-03
10	2	11	6	19	2022-10-10
11	2	11	6	19	2022-10-17
12	2	11	6	19	2022-10-24
13	2	8	6	16	2022-10-31
14	2	14	6	22	2022-11-07
15	1	9	6	16	2022-11-14
16	2	12	6	20	2022-11-21
17	0	0	0	0	2022-11-28
18	0	0	0	0	2022-12-05
19	0	0	0	0	2022-12-12
20	0	0	0	0	2022-12-19
21	0	0	0	0	2022-12-26
