# Supplementary material for: Injury and Illness in Non-Football Collegiate Athletics: a Single University, 8-Year Retrospective Analysis
Source: Research Square preprint supplement (doi:10.21203/rs.3.rs-7652417/v1), 2025-10-30
Supplement: Supplementary file 25 [file W_Water Polo_Hrs.xlsx]

## Sheet: hours - wwp_2022_hours
Week	Workout/Conditioning	Practice	Game	Total Hours
16	3.5	7.5	0	11	2022-01-03
17	3.5	13.5	0	17	2022-01-10
18	5	10	6	21	2022-01-17
19	3.5	8	3	14.5	2022-01-24
20	6.5	12	3	21.5	2022-01-31
21	6	10	2	18	2022-02-07
22	4	8	1	13	2022-02-14
23	5	10	3	18	2022-02-21
24	3	6	2	11	2022-02-28
25	5.5	8	3	16.5	2022-03-07
26	0	4	2	6	2022-03-14
27	3	12.5	4	19.5	2022-03-21
28	1.5	4	1	6.5	2022-03-28
29	3	8.5	1	12.5	2022-04-04
30	1	9.5	2	12.5	2022-04-11
31	0	5.5	3	8.5	2022-04-18
32	0	0	0	0	2022-04-25
33	0	0	0	0	2022-05-02
34	0	0	0	0	2022-05-09
35	0	0	0	0	2022-05-16
36	0	0	0	0	2022-05-23
37	0	0	0	0	2022-05-30
38	0	0	0	0	2022-06-06
39	0	0	0	0	2022-06-13
40	0	0	0	0	2022-06-20
41	0	0	0	0	2022-06-27
42	0	0	0	0	2022-07-04
43	0	0	0	0	2022-07-11
44	0	0	0	0	2022-07-18
45	0	0	0	0	2022-07-25
46	0	0	0	0	2022-08-01
47	0	0	0	0	2022-08-08
48	0	0	0	0	2022-08-15
49	0	0	0	0	2022-08-22
50	0	0	0	0	2022-08-29
51	0	0	0	0	2022-09-05
52	0	0	0	0	2022-09-12
1	2	0	0	2	2022-09-19
2	5.5	2	0	7.5	2022-09-26
3	5.5	2	0	7.5	2022-10-03
4	4.5	10	0	14.5	2022-10-10
5	4.5	10	0	14.5	2022-10-17
6	4.5	9.5	0	14	2022-10-24
7	3.5	8	0	11.5	2022-10-31
8	4.5	10	0	14.5	2022-11-07
9	4.5	10	0	14.5	2022-11-14
10	6	0	0	6	2022-11-21
11	0	0	0	0	2022-11-28
12	0	0	0	0	2022-12-05
13	0	0	0	0	2022-12-12
14	0	0	0	0	2022-12-19
15	0	0	0	0	2022-12-26
