# Supplementary material for: Injury and Illness in Non-Football Collegiate Athletics: a Single University, 8-Year Retrospective Analysis
Source: Research Square preprint supplement (doi:10.21203/rs.3.rs-7652417/v1), 2025-10-30
Supplement: Supplementary file 26 [file W_Water Polo_Hrs_Club.xlsx]

## Sheet: Sport_Hours_WP_Women
Week	Game	Practice	xClub Hours	Workout/Conditioning	Total Hours	Date
1		12.5		3	15.5	2022-01-03
2		12.5		3	15.5	2022-01-10
3	6	11		3	20	2022-01-17
4	3	12.5		3	18.5	2022-01-24
5		12.5		3	15.5	2022-01-31
6	6	11		3	20	2022-02-07
7	3	12.5		3	18.5	2022-02-14
8	6	11		3	20	2022-02-21
9	4.5	12.5		3	20	2022-02-28
10	6	11		3	20	2022-03-07
11	1.5	12.5		3	17	2022-03-14
12	3	12.5		3	18.5	2022-03-21
13	1.5	12.5		3	17	2022-03-28
14	1.5	12.5		3	17	2022-04-04
15	3	12.5		3	18.5	2022-04-11
16	3	12.5		3	18.5	2022-04-18
17					0	2022-04-25
18					0	2022-05-02
19		4		4	8	2022-05-09
20		4		4	8	2022-05-16
21		4		4	8	2022-05-23
22		4		4	8	2022-05-30
23		4		4	8	2022-06-06
24			7.5	3.5	11	2022-06-13
25			7.5	3.5	11	2022-06-20
26			7.5	3.5	11	2022-06-27
27			7.5	3.5	11	2022-07-04
28		4		3.5	7.5	2022-07-11
29		4		3.5	7.5	2022-07-18
30		4		3.5	7.5	2022-07-25
31		4		3.5	7.5	2022-08-01
32		4		3.5	7.5	2022-08-08
33		4		3.5	7.5	2022-08-15
34		4		3.5	7.5	2022-08-22
35		4		3.5	7.5	2022-08-29
36		4		3.5	7.5	2022-09-05
37		4		3.5	7.5	2022-09-12
38		4		3.5	7.5	2022-09-19
39		6		1.5	7.5	2022-09-26
40		6		1.5	7.5	2022-10-03
41		10		3	13	2022-10-10
42		10		3	13	2022-10-17
43		10		3	13	2022-10-24
44		10		3	13	2022-10-31
45		10		3	13	2022-11-07
46		10		3	13	2022-11-14
47		10		3	13	2022-11-21
48		4		3	7	2022-11-28
49		4		3	7	2022-12-05
50		4		3	7	2022-12-12
51		4		3	7	2022-12-19
52		4		3	7	2022-12-26
